# Supplementary material
Source: PubMed Central journal article supplement (PMC3482372)
Supplement: NIHMS411128-supplement-Supplemental.pdf [file NIHMS411128-supplement-Supplemental.pdf]

## Supplementary Information for

### Genome-wide association study identifies loci influencing concentrations of liver enzymes in plasma

#### Authors:

John C Chambers, Weihua Zhang, Joban Sehmi, Xinzhong Li, Mark N Wass, Pim Van der Harst, Hilma Holm, Serena Sanna, Maryam Kavousi, Sebastian E Baumeister, Lachlan J Coin, Guohong Deng, Christian Gieger, Nancy L Heard-Costa, Jouke-Jan Hottenga, Brigitte Kühnel, Vinod Kumar, Vasiliki Lagou, Liming Liang, Jian'an Luan, Pedro Marques Vidal, Irene Mateo Leach, Paul F O'Reilly, John F Peden, Nilufer Rahmioglu, Pasi Soininen, Elizabeth K Speliotes, Xin Yuan, Gudmar Thorleifsson, Behrooz Z Alizadeh, Larry D Atwood, Ingrid B Borecki, Morris J Brown, Pimphen Charoen, Francesco Cucca, Debashish Das, Eco JC de Geus, Anna L Dixon, Angela Döring, Georg Ehret, Gudmundur I Eyjolfsson, Martin Farrall, Nita G Forouhi, Nele Friedrich, Wolfram Goessling, Daniel F Gudbjartsson, Tamara B Harris, Anna-Liisa Hartikainen, Simon Heath, Gideon M Hirschfield, Albert Hofman, Georg Homuth, Elina Hyppönen, Harry LA Janssen, Toby Johnson, Antti J Kangas, Ido P Kema, Jens P Kühn, Sandra Lai, Mark Lathrop, Markus M Lerch, Yun Li, T Jake Liang, Jing-Ping Lin, Ruth JF Loos, Nicholas G Martin, Miriam F Moffatt, Grant W Montgomery, Patricia B Munroe, Kiran Musunuru, Yusuke Nakamura, Christopher J O'Donnell, Isleifur Olafsson, Brenda W Penninx, Anneli Pouta, Bram P Prins, Inga Prokopenko, Ralf Puls, Aimo Ruukonen, Markku J Savolainen, David Schlessinger, Jeffrey NL Schouten, Udo Seedorf, Srijita Sen-Chowdhry, Katherine A Siminovitch, Johannes H Smit, Timothy D Spector, Wenting Tan, Tanya M Teslovich, Taru Tukiainen, Andre G Uitterlinden, Melanie M Van der Klauw, Ramachandran S Vasani, Chris Wallace, Henri Wallaschofski, H.-Erich Wichmann, Gonneke Willemsen, Peter Würtz, Chun Xu, Laura M Yerges-Armstrong, AlcaGen, DIAGRAM, GIANT, Global Lipids Genetics Consortium, The GOLD consortium, ICBP, MAGIC, Goncalo R Abecasis, Kourosh R Ahmadi, Dorret I Boomsma, Mark Caulfield, William O Cookson, Cornelia M van Duijn, Philippe Froguel, Koichi Matsuda, Mark I McCarthy, Christa Meisinger, Vincent Mooser, Kirsi H Pietiläinen, Gunter Schumann, Harold Snieder, Michael JE Sternberg, Ronald P Stolk, Unnur Thorsteinsdottir, Manuela Uda, Gérard Waeber, Nicholas J Wareham, Dawn M Waterworth, Hugh Watkins, John B Whitfield, Jacqueline CM Witteman, Bruce HR Wolffenbuttel, Caroline S Fox, Mika Ala-Korpela, Kari Stefansson, Peter Vollenweider, Henry Völzke, Eric E Schadt, James Scott, Marjo-Riitta Järvelin, Paul Elliott, Jaspal S Kooner,

**Supplementary Table 1.** Characteristics of participants in the genome-wide association cohorts. Results are given as mean (SD) or as % for categorical variables.

|                                          | <b>N<sub>max</sub></b> | <b>Ethnic group</b> | <b>Age (years)</b> | <b>Female</b> | <b>BMI (kg/m<sup>2</sup>)</b> | <b>Alcohol (U/week)</b> | <b>HT</b> | <b>T2D</b> | <b>CHD</b> |
|------------------------------------------|------------------------|---------------------|--------------------|---------------|-------------------------------|-------------------------|-----------|------------|------------|
| <b>Australian Twin</b>                   | 425                    | Caucasian           | 47.2 (12.5)        | 100           | 25.1 (4.6)                    | 3.4 (4.9)               | 10.1      | 0.8        | 1.4        |
| <b>BRIGHT</b>                            | 1805                   | Caucasian           | 56.7 (11.1)        | 60.9          | 27.5 (3.8)                    | 7.5 (11.1)              | 100       | 0          | 4.8        |
| <b>CoLaus</b>                            | 5636                   | Caucasian           | 53.2 (10.7)        | 52.3          | 25.8 (4.6)                    | 7.0 (9.0)               | 19.5      | 6.7        | 3.6        |
| <b>Decode</b>                            | 12572                  | Caucasian           | 61.5 (16.8)        | 60.6          | 27.5 (5.4)                    | NA                      | 26.0      | 8.7        | 26.4       |
| <b>Fenland</b>                           | 1397                   | Caucasian           | 45.0 (7.3)         | 56.0          | 27.1 (4.9)                    | 9.9 (12.3)              | 28.1      | 0          | 0          |
| <b>FinnTwin</b>                          | 32                     | Caucasian           | 26.5 (1.6)         | 64.0          | 26.8 (6.1)                    | 3.3 (3.3)               | 0         | 0          | 0          |
| <b>Framingham</b>                        | 2869                   | Caucasian           | 43.6 (9.8)         | 52.2          | 25.6 (4.3)                    | 3.6 (5.0)               | 21.3      | 1.9        | 2.3        |
| <b>KORA</b>                              | 1809                   | Caucasian           | 62.5 (10.1)        | 50.6          | 28.1 (4.5)                    | 15.4 (20.1)             | 60.7      | 11.0       | 3.5        |
| <b>LOLIPOP Affymetrix European</b>       | 876                    | Caucasian           | 53.2 (8.2)         | 23.6          | 27.8 (4.8)                    | 14.9 (18.0)             | 26.4      | 11.3       | 30.6       |
| <b>LOLIPOP Perlegen European</b>         | 723                    | Caucasian           | 56.0 (8.9)         | 0             | 28.6 (5.3)                    | 17.0 (19.7)             | 55.1      | 16.3       | 42.4       |
| <b>LOLIPOP Perlegen Indian Asian</b>     | 588                    | Indian Asian        | 50.8 (8.2)         | 0             | 27.1 (4.0)                    | 9.6 (15.2)              | 53.3      | 20.8       | 0          |
| <b>LOLIPOP Illumina 317 Indian Asian</b> | 2109                   | Indian Asian        | 48.1 (10.4)        | 0             | 26.8 (4.3)                    | 7.9 (15.5)              | 44.0      | 20.1       | 0          |
| <b>LOLIPOP Illumina 610 Indian Asian</b> | 6042                   | Indian Asian        | 56.9 (10.0)        | 18.0          | 27.4 (4.3)                    | 5.4 (11.3)              | 47.9      | 25.1       | 43.7       |
| <b>NESDA</b>                             | 1724                   | Caucasian           | 42.4 (12.5)        | 67.8          | 25.8 (5.2)                    | 7.1 (9.7)               | 38.3      | 3.6        | 2.0        |
| <b>Netherland Twins Register</b>         | 1721                   | Caucasian           | 45.9 (14.1)        | 63.4          | 25.2 (4.0)                    | 8.1 (7.1)               | 0         | 6.3        | 0          |
| <b>NFBC1966</b>                          | 4562                   | Caucasian           | 31.2 (0.4)         | 53.5          | 24.6 (4.2)                    | 1.2 (2.2)               | 19.5      | 0.6        | 0          |
| <b>PROCARDIS</b>                         | 1230                   | Caucasian           | 60.3 (7.1)         | 17%           | 28.2 (4.1)                    | 6.5(8.5)                | 45.5      | 11.8       | 100        |
| <b>Rotterdam Study 1</b>                 | 4312                   | Caucasian           | 69.9 (9.0)         | 61.3          | 26.3 (3.7)                    | 1.3 (1.8)               | 56.2      | 10.6       | 8.3        |
| <b>SardiNIA</b>                          | 4301                   | Caucasian           | 43.5 (17.6)        | 56.2          | 25.3 (4.8)                    | 17.1 (15.9)             | 25.2      | 2.2        | 2.6        |
| <b>SHIP</b>                              | 4101                   | Caucasian           | 49.7 (16.2)        | 50.7          | 27.3 (4.7)                    | 3.3 (3.6)               | 52.8      | 6.8        | 8.2        |
| <b>TwinsUK</b>                           | 2255                   | Caucasian           | 46.6 (12.3)        | 100           | 25.0 (4.7)                    | 5.0 (7.0)               | 22.0      | 1.0        | 8.0        |

BMI: Body mass index

HT: Hypertension – Physician diagnosis on treatment, or blood pressure >140/85mmHg

CHD: Myocardial infarction, coronary revascularisation or significant coronary stenosis

T2D: Type-2 diabetes – Physician diagnosis on treatment, or fasting glucose >7mmol/L

**Supplementary Table 2.** Liver function marker levels and genotyping methods in the genome-wide association cohorts. Marker levels are given as mean (SD).

|                                          | <b>ALP<br/>(IU/L)</b> | <b>ALT<br/>(IU/L)</b> | <b>GGT<br/>(IU/L)</b> | <b>LFT method (analyser)</b>           |
|------------------------------------------|-----------------------|-----------------------|-----------------------|----------------------------------------|
| <b>Australian Twin</b>                   | 64.9 (22.5)           | 15.7 (9.1)            | 18.3 (17.7)           | Hitachi 747 analyser                   |
| <b>BRIGHT</b>                            | -                     | -                     | 24 (17–36)            | Hitachi analyser                       |
| <b>CoLaus</b>                            | 63.4 (20.2)           | 27.7 (19.6)           | 32.2 (40.2)           | Roche Diagnostics                      |
| <b>deCODE</b>                            | 80.3 (35.6)           | 27.4 (18.6)           | 43.8 (55.3)           | Roche Diagnostics                      |
| <b>Fenland</b>                           | 74.8 (22.1)           | 30.9 (19.4)           | 35.1 (34.2)           | Dade Behring Dimension RxL             |
| <b>FinnTwin</b>                          | -                     | 28.3 (22.8)           | 21.6 (25.2)           | Roche Diagnostics                      |
| <b>Framingham</b>                        | 72.0 (22.1)           | -                     | 16.0 (13.2)           | Beckman Liquid-Stat                    |
| <b>KORA</b>                              | -                     | 20.4 (9.6)            | 40.2 (57.6)           | Roche Diagnostics                      |
| <b>LOLIPOP Affymetrix European</b>       | 74.1 (16.4)           | 29.1 (16.8)           | 40.0 (25.3)           | Roche Diagnostics                      |
| <b>LOLIPOP Perlegen European</b>         | 74.4 (20.9)           | 31.8 (18.7)           | 47.0 (81.5)           | Roche Diagnostics                      |
| <b>LOLIPOP Perlegen Indian Asian</b>     | 77.0 (18.3)           | 34.6 (22.3)           | 47.4 (61.0)           | Roche Diagnostics                      |
| <b>LOLIPOP Illumina 317 Indian Asian</b> | 80.0 (22.1)           | 35.6 (23.2)           | 51.9 (68.2)           | Roche Diagnostics                      |
| <b>LOLIPOP Illumina 610 Indian Asian</b> | 80.8 (26.1)           | 29.7 (18.7)           | 46.8 (76.2)           | Roche Diagnostics                      |
| <b>NESDA</b>                             | -                     | 23.1 (14.3)           | 25.0 (25.4)           | Roche Diagnostics                      |
| <b>Netherlands Twins Register</b>        | -                     | 10.3 (6.9)            | 32.2 (37.5)           | Vitros 250 analyser                    |
| <b>NFBC1966</b>                          | 35.5 (12.8)           | 9.4 (4.6)             | 22.1 (34.6)           | Roche Diagnostics                      |
| <b>PROCARDIS</b>                         | 76.0 (27.3)           | 18.8 (10.7)           | 29.6 (37.1)           | Hitachi 747 analyser                   |
| <b>Rotterdam Study 1</b>                 | 79.6 (26.9)           | 18.0 (11.4)           | 30.0 (29.2)           | ELAN-Fully Selective Analyzer          |
| <b>SardinIA</b>                          | -                     | 25.0 (23.1)           | 27.9 (39.9)           | Hitachi 747 analyser                   |
| <b>SHIP</b>                              | -                     | 28.4 (19.8)           | 35.2 (75.0)           | Hitachi 717 &<br>Hitachi 704 analysers |
| <b>TwinsUK</b>                           | 27.0 (10.5)           | 25.0 (10.7)           | 23.8 (15.1)           | Synchron LX20                          |

**Supplementary Table 3.** Sample and SNP QC, and use of principal components in the genome-wide association cohorts

|                                          | <b>Design</b> | <b>GWA platform</b> | <b>Call rate</b> | <b>Genotype calling</b> | <b>Imputation Software</b> | <b>Association software</b> | <b>Study specific covariates*</b>   |
|------------------------------------------|---------------|---------------------|------------------|-------------------------|----------------------------|-----------------------------|-------------------------------------|
| <b>Australian Twin</b>                   | Twins         | Perlegen 600K       | >95%             | Perlegen                | MACH2                      | Merlin                      | None, samples excluded based on PCs |
| <b>BRIGHT</b>                            | Case cohort   | Affymetrix 500k     | >95%             | BRLMM                   | IMPUTE                     | SNPTEST                     | None, samples excluded based on PCs |
| <b>CoLaus</b>                            | Population    | Affymetrix 500K     | >90%             | BRLMM                   | IMPUTE                     | QUICKTEST                   | PCs                                 |
| <b>deCODE</b>                            | Population    | Illumina 300/370K   | >96%             | BeadStudio              | IMPUTE                     | SNPtest                     | None, samples excluded based on PCs |
| <b>Fenland</b>                           | Population    | Affymetrix 500K     | >90%             | BRLMM                   | IMPUTE                     | SNPTEST                     | PCs                                 |
| <b>FinnTwin</b>                          | Twins         | Illumina 317K       | >95%             | BeadStudio              | IMPUTE                     | PLINK                       | None, samples excluded based on PCs |
| <b>Framingham</b>                        | Population    | Affymetrix 500K     | >97%             | BRLMM                   | MACH                       | LME in R                    | PCs                                 |
| <b>KORA</b>                              | Population    | Affymetrix 500K     | >93%             | BRLMM                   | IMPUTE                     | SNPTEST                     | PCs                                 |
| <b>LOLIPOP Affymetrix European</b>       | Population    | Affymetrix 500K     | >90%             | BRLMM                   | MACH                       | Mach2qtl                    | PCs                                 |
| <b>LOLIPOP Perlegen European</b>         | Population    | Perlegen 284K       | >90%             | Perlegen                | MACH                       | Mach2qtl                    | PCs                                 |
| <b>LOLIPOP Perlegen Indian Asian</b>     | Population    | Perlegen 284K       | >90%             | Perlegen                | MACH                       | Mach2qtl                    | PCs                                 |
| <b>LOLIPOP Illumina 317 Indian Asian</b> | Population    | Illumina 317K       | >90%             | BeadStudio              | MACH                       | Mach2qtl                    | PCs                                 |
| <b>LOLIPOP Illumina 610 Indian Asian</b> | Population    | Illumina 610K       | >90%             | BeadStudio              | MACH                       | Mach2qtl                    | PCs                                 |
| <b>NESDA</b>                             | Case-control  | Perlegen 600K       | >96%             | Perlegen                | IMPUTE                     | SNPTEST                     | Case status & PCs                   |
| <b>Netherland Twins Register</b>         | Twins         | Perlegen 600K       | >95%             | Perlegen                | MACH                       | SNPTEST                     | None, samples excluded based on PCs |
| <b>NFBC1966</b>                          | Population    | Illumina 370K       | >95%             | BeadStudio              | IMPUTE                     | SNPTEST                     | PCs                                 |
| <b>PROCARDIS</b>                         | Case-control  | Illumina 610K       | >95%             | BeadStudio              | IMPUTE                     | STATA                       | Case status, Study site             |
| <b>Rotterdam Study 1</b>                 | Population    | Illumina 550K       | >97.5            | BeadStudio              | MACH                       | Mach2qtl                    | PCs                                 |
| <b>SardiNIA</b>                          | Population    | Affymetrix 500K     | >90%             | BRLMM                   | MACH                       | Merlin                      | None, samples excluded based on PCs |
| <b>SHIP</b>                              | Population    | Affymetrix 6.0      | >92%             | Birdseed2               | IMPUTE                     | SNPtest                     | PCs                                 |
| <b>TwinsUK</b>                           | Twins         | Illumina 317K       | >95%             | Illuminus               | IMPUTE                     | ProbABEL                    | None, samples excluded based on PCs |

Each study excluded SNPs with MAF < 0.01 or with poor imputation quality (Rsq < 0.3 in MACH, or proper info < 0.3 in IMPUTE)

\*PCs = Principal Components, calculated by EIGENSTRAT.

**Supplementary Table 4.** Genomic control lambda values for the genome-wide association analyses

| <b>Cohort</b>                       | <b>ALP</b> | <b>ALT</b> | <b>GGT</b> |
|-------------------------------------|------------|------------|------------|
| Australian Twins                    | 1.007      | 1.011      | 1.003      |
| BRIGHT                              |            |            | 1.015      |
| CoLaus                              | 1.022      | 1.031      | 1.019      |
| Decode                              | 0.986      | 0.991      | 1.005      |
| FinnTwin                            |            | 1.042      | 0.993      |
| Framingham                          | 0.986      | 1.009      | 1.000      |
| KORA                                | 1.011      | 0.998      | 1.018      |
| LOLIPOP- Affymetrix European        | 1.028      | 1.002      | 1.007      |
| LOLIPOP- Perlegen European          | 0.995      | 1.006      | 1.002      |
| LOLIPOP- Illumina 300 Indian Asian  | 1.009      | 1.016      | 1.020      |
| LOLIPOP- Perlegen Indian Asian      | 1.002      | 1.015      | 1.029      |
| LOLIPOP - Illumina 610 Indian Asian | 1.018      | 1.017      | 1.018      |
| NESDA                               |            | 0.991      | 1.010      |
| NetherlandsTwin Register            |            | 0.998      | 1.021      |
| NFBC1966                            | 1.024      | 1.010      | 1.022      |
| PROCARDIS                           | 1.004      | 1.016      | 1.015      |
| Rotterdam Study 1                   |            | 1.025      | 1.034      |
| SardiNIA                            |            | 1.130      | 1.157      |
| SHIP                                |            | 1.032      | 1.016      |
| TwinsUK                             | 1.008      | 1.015      | 1.023      |
| Meta-analysis                       | 1.001      | 1.000      | 1.005      |

**Supplementary Table 5:** Correlations between blood levels of liver markers, and between association test results for liver markers. Results reported as Pearson correlation coefficients between log transformed values of marker (unshaded boxes) or P value (shaded boxes). All correlations are significant at  $P < 10^{-10}$ .

|            | <b>GGT</b> | <b>ALP</b> | <b>ALT</b> |
|------------|------------|------------|------------|
| <b>ALT</b> | 0.64       | 0.19       | -          |
| <b>ALP</b> | 0.28       | -          | 0.022      |
| <b>GGT</b> | -          | 0.064      | 0.189      |

**Supplementary Table 6.** Association of sentinel SNPs with liver markers in genome-wide association (GWA) and further testing.

| Locus      | SNPs at $P < 1 \times 10^{-7}$ | Sentinel SNP | GWA N | GWA P                  | Futher testing N | Further testing P    |
|------------|--------------------------------|--------------|-------|------------------------|------------------|----------------------|
| <b>ALT</b> |                                |              |       |                        |                  |                      |
| 4q22       | 25                             | rs6834314    | 55458 | $3.1 \times 10^{-9}$   |                  |                      |
| 8q24       | 17                             | rs2954021    | 55412 | $5.3 \times 10^{-9}$   |                  |                      |
| 10q24      | 10                             | rs10883437   | 54714 | $4.0 \times 10^{-9}$   |                  |                      |
| 22q13      | 57                             | rs738409     | 55305 | $1.2 \times 10^{-45}$  |                  |                      |
| <b>ALP</b> |                                |              |       |                        |                  |                      |
| 1p36.12    | 84                             | rs1976403    | 31742 | $1.8 \times 10^{-50}$  |                  |                      |
| 2q24       | 17                             | rs16856332   | 32520 | $1.6 \times 10^{-9}$   |                  |                      |
| 6p22       | 66                             | rs1883415    | 32533 | $5.6 \times 10^{-26}$  |                  |                      |
| 8p23       | 10                             | rs6984305    | 32006 | $2.1 \times 10^{-10}$  |                  |                      |
| 8q24       | 19                             | rs2954021    | 32591 | $2.3 \times 10^{-13}$  |                  |                      |
| 9q21       | 3                              | rs10819937   | 32189 | $2.0 \times 10^{-8}$   | 11892            | $3.2 \times 10^{-3}$ |
| 9q34       | 89                             | rs579459     | 31870 | $2.6 \times 10^{-123}$ |                  |                      |
| 10q21      | 160                            | rs7923609    | 32644 | $5.9 \times 10^{-23}$  |                  |                      |
| 11q12      | 14                             | rs174601     | 31820 | $1.3 \times 10^{-8}$   | 11965            | $1.0 \times 10^{-2}$ |
| 11q.24     | 7                              | rs2236653    | 31853 | $1.8 \times 10^{-9}$   |                  |                      |
| 16q22      | 7                              | rs7186908    | 32577 | $4.8 \times 10^{-9}$   |                  |                      |
| 17p13      | 2                              | rs314253     | 32048 | $8.4 \times 10^{-12}$  |                  |                      |
| 19q13      | 37                             | rs281377     | 31604 | $1.1 \times 10^{-15}$  |                  |                      |
| 20p11      | 94                             | rs7267979    | 32600 | $7.4 \times 10^{-10}$  |                  |                      |
| <b>GGT</b> |                                |              |       |                        |                  |                      |
| 1p36.13    | 49                             | rs1497406    | 57592 | $2.8 \times 10^{-19}$  |                  |                      |
| 1p22       | 42                             | rs12145922   | 57603 | $3.8 \times 10^{-11}$  |                  |                      |
| 1p13       | 4                              | rs1335645    | 57649 | $7.3 \times 10^{-9}$   |                  |                      |
| 1q21       | 30                             | rs10908458   | 57602 | $1.7 \times 10^{-15}$  |                  |                      |
| 2p23       | 5                              | rs1260326    | 57623 | $3.9 \times 10^{-13}$  |                  |                      |
| 2q12       | 69                             | rs13030978   | 57247 | $1.1 \times 10^{-11}$  |                  |                      |
| 2q37       | 4                              | rs2140773    | 57604 | $1.1 \times 10^{-9}$   |                  |                      |
| 3q26       | 44                             | rs10513686   | 56686 | $6.1 \times 10^{-11}$  |                  |                      |
| 4q31       | 24                             | rs4547811    | 57567 | $2.5 \times 10^{-27}$  |                  |                      |
| 5p15       | 6                              | rs6888304    | 56636 | $1.0 \times 10^{-8}$   | 11935            | $9.1 \times 10^{-3}$ |
| 5q11       | 4                              | rs4074793    | 54935 | $3.4 \times 10^{-10}$  |                  |                      |
| 6p12       | 10                             | rs9296736    | 57554 | $2.6 \times 10^{-9}$   |                  |                      |
| 7q11       | 21                             | rs17145750   | 57175 | $2.9 \times 10^{-9}$   |                  |                      |
| 10q23      | 24                             | rs754466     | 57343 | $6.4 \times 10^{-10}$  |                  |                      |
| 12q24      | 67                             | rs7310409    | 57452 | $7.0 \times 10^{-45}$  |                  |                      |
| 14q32      | 44                             | rs944002     | 52414 | $5.8 \times 10^{-29}$  |                  |                      |
| 15q21      | 29                             | rs339969     | 57552 | $6.6 \times 10^{-20}$  |                  |                      |
| 15q23      | 5                              | rs8038465    | 57627 | $1.5 \times 10^{-8}$   | 11939            | $7.2 \times 10^{-3}$ |
| 16q23      | 2                              | rs4581712    | 56906 | $2.2 \times 10^{-8}$   | 11879            | $1.1 \times 10^{-2}$ |
| 17q24      | 1                              | rs9913711    | 57511 | $9.5 \times 10^{-8}$   | 11844            | $6.5 \times 10^{-4}$ |
| 18q21.31   | 1                              | rs12968116   | 48901 | $1.8 \times 10^{-8}$   | 11944            | $3.6 \times 10^{-3}$ |
| 18q21.32   | 41                             | rs4503880    | 48078 | $3.0 \times 10^{-12}$  |                  |                      |
| 19q13      | 11                             | rs516246     | 53006 | $7.6 \times 10^{-10}$  |                  |                      |
| 22q11.21   | 34                             | rs1076540    | 57657 | $9.6 \times 10^{-17}$  |                  |                      |
| 22q11.23   | 16                             | rs2739330    | 48783 | $1.7 \times 10^{-9}$   |                  |                      |
| 22q11.23   | 19                             | rs2073398    | 56216 | $1.1 \times 10^{-109}$ |                  |                      |

**Supplementary Table 7.** Characteristics of LOLIPOP participants used for further testing of SNPs with ALP, ALT and GGT levels.

|                          | European whites | Indian Asians | Combined    |
|--------------------------|-----------------|---------------|-------------|
| N=                       | 5328            | 6811          | 12,139      |
| Age (years)              | 52.4 (11.8)     | 46.4 (10.2)   | 49.0 (11.3) |
| Female sex (%)           | 40.6            | 61.6          | 52.4        |
| BMI (kg/m <sup>2</sup> ) | 27.4 (5.0)      | 27.5 (4.7)    | 27.5 (4.9)  |
| Alcohol (Units / week)   | 12.1 (17.6)     | 3.1 (9.8)     | 7.0 (14.5)  |
| HT (%)                   | 20.0            | 18.0          | 18.9        |
| T2D (%)                  | 7.3             | 11.5          | 9.6         |
| CHD (%)                  | 7.6             | 0.3           | 3.5         |
| ALP (IU/L)               | 76.2 (28.5)     | 82.0 (27.5)   | 79.5 (28.1) |
| ALT (IU/L)               | 28.3 (20.1)     | 28.6 (20.1)   | 28.5 (20.8) |
| GGT (IU/L)               | 43.8 (74.1)     | 39.0 (57.7)   | 41.1 (65.4) |

BMI: Body Mass Index

HT: Hypertension – Physician diagnosis on treatment, or blood pressure >140/85mmHg

CHD: Myocardial infarction, coronary revascularisation or significant coronary stenosis.

T2D: Type-2 diabetes – Physician diagnosis on treatment, or fasting glucose >7mmol/L



**Supplementary Table 8.** Association of sentinel SNPs with the three liver markers tested. Arrow indicates direction of change for effect allele. Discovery association highlighted orange; secondary associations reaching  $6 \times 10^{-4}$  ( $P < 0.05$  after Bonferroni correction) highlighted yellow.

| Region     | SNP        | Genes of interest                    | Alleles (R / E) | ALT                     | ALP                      | GGT                      |
|------------|------------|--------------------------------------|-----------------|-------------------------|--------------------------|--------------------------|
| <b>ALT</b> |            |                                      |                 |                         |                          |                          |
| 4q22       | rs6834314  | <i>HSD17B13, MAPK10</i>              | G / A           | ↑ $3.1 \times 10^{-09}$ | ↓ $7.8 \times 10^{-02}$  | ↑ $2.5 \times 10^{-02}$  |
| 8q24       | rs2954021  | <i>TRIB1</i>                         | G / A           | ↑ $5.2 \times 10^{-09}$ | ↑ $2.3 \times 10^{-13}$  | ↑ $8.0 \times 10^{-06}$  |
| 10q24      | rs10883437 | <i>CPN1</i>                          | A / T           | ↑ $4.0 \times 10^{-09}$ | ↑ $5.7 \times 10^{-02}$  | ↑ $1.9 \times 10^{-03}$  |
| 22q13      | rs738409   | <i>PNPLA3, SAMM50</i>                | C / G           | ↑ $1.2 \times 10^{-45}$ | ↓ $2.2 \times 10^{-01}$  | ↓ $9.7 \times 10^{-01}$  |
| <b>ALP</b> |            |                                      |                 |                         |                          |                          |
| 1p36.12    | rs1976403  | <i>ALPL, NBPF3</i>                   | A / C           | ↓ $6.7 \times 10^{-01}$ | ↑ $1.8 \times 10^{-50}$  | ↓ $7.0 \times 10^{-01}$  |
| 2q24       | rs16856332 | <i>ABCB11</i>                        | G / T           | ↓ $3.6 \times 10^{-01}$ | ↑ $1.6 \times 10^{-09}$  | ↓ $6.5 \times 10^{-02}$  |
| 6p22       | rs1883415  | <i>ALDH5A1, GPLD1</i>                | A / C           | ↓ $7.0 \times 10^{-01}$ | ↑ $5.6 \times 10^{-26}$  | ↓ $9.2 \times 10^{-01}$  |
| 8p23       | rs6984305  | <i>PPP1R3B</i>                       | T / A           | ↑ $4.3 \times 10^{-02}$ | ↑ $2.1 \times 10^{-10}$  | ↓ $4.2 \times 10^{-03}$  |
| 8q24       | rs2954021  | <i>TRIB1</i>                         | G / A           | ↑ $5.2 \times 10^{-09}$ | ↑ $2.3 \times 10^{-13}$  | ↑ $8.0 \times 10^{-06}$  |
| 9q21       | rs10819937 | <i>ALDOB, C9orf125</i>               | G / C           | ↓ $7.4 \times 10^{-01}$ | ↑ $2.0 \times 10^{-08}$  | ↑ $4.9 \times 10^{-02}$  |
| 9q34       | rs579459   | <i>ABO</i>                           | C / T           | ↓ $8.4 \times 10^{-01}$ | ↑ $2.6 \times 10^{-123}$ | ↓ $2.4 \times 10^{-05}$  |
| 10q21      | rs7923609  | <i>JMJD1C, NRBF2</i>                 | A / G           | ↓ $4.4 \times 10^{-01}$ | ↑ $5.9 \times 10^{-23}$  | ↑ $4.4 \times 10^{-03}$  |
| 11q12      | rs174601   | <i>C11orf10, FADS1, FADS2</i>        | C / T           | ↓ $4.9 \times 10^{-05}$ | ↑ $1.3 \times 10^{-08}$  | ↓ $5.3 \times 10^{-01}$  |
| 11q.24     | rs2236653  | <i>ST3GAL4</i>                       | C / T           | ↑ $5.4 \times 10^{-01}$ | ↑ $1.8 \times 10^{-09}$  | ↓ $4.6 \times 10^{-01}$  |
| 16q22      | rs7186908  | <i>HPR, PMFBP1</i>                   | G / C           | ↓ $5.6 \times 10^{-01}$ | ↑ $4.8 \times 10^{-09}$  | ↑ $5.5 \times 10^{-01}$  |
| 17p13      | rs314253   | <i>ASGR1, DLG4</i>                   | T / C           | ↑ $2.9 \times 10^{-01}$ | ↑ $8.4 \times 10^{-12}$  | ↑ $2.4 \times 10^{-01}$  |
| 19q13      | rs281377   | <i>FUT2</i>                          | C / T           | ↓ $8.8 \times 10^{-01}$ | ↑ $1.1 \times 10^{-15}$  | ↓ $1.9 \times 10^{-06}$  |
| 20p11      | rs7267979  | <i>ABHD12, GINS1, PYGB</i>           | A / G           | ↓ $3.8 \times 10^{-02}$ | ↑ $7.4 \times 10^{-10}$  | ↑ $6.9 \times 10^{-01}$  |
| <b>GGT</b> |            |                                      |                 |                         |                          |                          |
| 1p36.13    | rs1497406  | <i>C1orf89, EPHA2</i>                | A / G           | ↑ $2.3 \times 10^{-06}$ | ↑ $3.3 \times 10^{-01}$  | ↑ $3.3 \times 10^{-19}$  |
| 1p22       | rs12145922 | <i>CCBL2, PKN2</i>                   | C / A           | ↑ $4.1 \times 10^{-03}$ | ↑ $1.6 \times 10^{-03}$  | ↑ $4.3 \times 10^{-11}$  |
| 1p13       | rs1335645  | <i>CEPT1, DENND2D</i>                | G / A           | ↑ $4.1 \times 10^{-06}$ | ↑ $7.6 \times 10^{-01}$  | ↑ $7.9 \times 10^{-09}$  |
| 1q21       | rs10908458 | <i>DPM3, EFNA1, PKLR</i>             | C / T           | ↑ $2.2 \times 10^{-07}$ | ↑ $2.1 \times 10^{-01}$  | ↑ $1.9 \times 10^{-15}$  |
| 2p23       | rs1260326  | <i>C2orf16, GCKR</i>                 | C / T           | ↓ $9.0 \times 10^{-01}$ | ↑ $3.2 \times 10^{-06}$  | ↑ $4.4 \times 10^{-13}$  |
| 2q12       | rs13030978 | <i>MYO1B, STAT4</i>                  | C / T           | ↑ $3.1 \times 10^{-01}$ | ↑ $2.9 \times 10^{-01}$  | ↑ $1.2 \times 10^{-11}$  |
| 2q37       | rs2140773  | <i>EFHD1, LOC100129166</i>           | C / A           | ↑ $7.6 \times 10^{-06}$ | ↓ $6.8 \times 10^{-01}$  | ↑ $1.2 \times 10^{-09}$  |
| 3q26       | rs10513686 | <i>SLC2A2</i>                        | G / A           | ↑ $1.3 \times 10^{-03}$ | ↑ $4.0 \times 10^{-01}$  | ↑ $6.8 \times 10^{-11}$  |
| 4q31       | rs4547811  | <i>ZNF827</i>                        | T / C           | ↑ $1.0 \times 10^{-07}$ | ↑ $6.7 \times 10^{-01}$  | ↑ $3.2 \times 10^{-27}$  |
| 5p15       | rs6888304  | <i>CDH6</i>                          | G / A           | ↑ $6.7 \times 10^{-05}$ | ↑ $1.9 \times 10^{-01}$  | ↑ $1.1 \times 10^{-08}$  |
| 5q11       | rs4074793  | <i>ITGA1</i>                         | A / G           | ↑ $4.7 \times 10^{-04}$ | ↑ $1.3 \times 10^{-01}$  | ↑ $3.7 \times 10^{-10}$  |
| 6p12       | rs9296736  | <i>C6orf142</i>                      | C / T           | ↑ $2.6 \times 10^{-04}$ | ↑ $6.8 \times 10^{-05}$  | ↑ $2.9 \times 10^{-09}$  |
| 7q11       | rs17145750 | <i>MLXIPL</i>                        | T / C           | ↓ $1.1 \times 10^{-01}$ | ↑ $5.5 \times 10^{-02}$  | ↑ $3.2 \times 10^{-09}$  |
| 10q23      | rs754466   | <i>DLG5</i>                          | A / T           | ↑ $1.8 \times 10^{-02}$ | ↑ $5.6 \times 10^{-01}$  | ↑ $7.0 \times 10^{-10}$  |
| 12q24      | rs7310409  | <i>HNF1A, C12orf27</i>               | A / G           | ↓ $8.1 \times 10^{-01}$ | ↓ $8.5 \times 10^{-08}$  | ↑ $1.1 \times 10^{-44}$  |
| 14q32      | rs944002   | <i>C14orf73</i>                      | A / G           | ↑ $1.3 \times 10^{-01}$ | ↑ $1.1 \times 10^{-01}$  | ↑ $7.7 \times 10^{-29}$  |
| 15q21      | rs339969   | <i>RORA</i>                          | C / A           | ↑ $3.9 \times 10^{-05}$ | ↑ $5.7 \times 10^{-01}$  | ↑ $8.0 \times 10^{-20}$  |
| 15q23      | rs8038465  | <i>CD276</i>                         | C / T           | ↑ $1.6 \times 10^{-02}$ | ↑ $8.5 \times 10^{-01}$  | ↑ $1.6 \times 10^{-08}$  |
| 16q23      | rs4581712  | <i>DYNLRB2</i>                       | C / A           | ↑ $4.7 \times 10^{-02}$ | ↑ $9.4 \times 10^{-01}$  | ↑ $2.4 \times 10^{-08}$  |
| 17q24      | rs9913711  | <i>FLJ37644, SOX9</i>                | G / C           | ↑ $7.8 \times 10^{-05}$ | ↑ $7.6 \times 10^{-01}$  | ↑ $1.0 \times 10^{-07}$  |
| 18q21.31   | rs12968116 | <i>ATP8B1</i>                        | T / C           | ↑ $2.5 \times 10^{-02}$ | ↑ $3.2 \times 10^{-01}$  | ↑ $2.0 \times 10^{-08}$  |
| 18q21.32   | rs4503880  | <i>NEDD4L</i>                        | C / T           | ↑ $5.3 \times 10^{-03}$ | ↑ $2.7 \times 10^{-03}$  | ↑ $3.4 \times 10^{-12}$  |
| 19q13      | rs516246   | <i>FUT2</i>                          | C / T           | ↑ $1.8 \times 10^{-01}$ | ↓ $1.3 \times 10^{-14}$  | ↑ $8.3 \times 10^{-10}$  |
| 22q11.21   | rs1076540  | <i>MICAL3</i>                        | T / C           | ↓ $9.0 \times 10^{-01}$ | ↓ $4.0 \times 10^{-01}$  | ↑ $1.1 \times 10^{-16}$  |
| 22q11.23   | rs2739330  | <i>DDT, DDTL, GSTT1, GSTT2B, MIF</i> | C / T           | ↑ $1.2 \times 10^{-01}$ | ↑ $1.3 \times 10^{-02}$  | ↑ $1.9 \times 10^{-09}$  |
| 22q11.23   | rs2073398  | <i>GGT1, GGTL2</i>                   | C / G           | ↑ $7.2 \times 10^{-01}$ | ↑ $8.6 \times 10^{-01}$  | ↑ $3.5 \times 10^{-109}$ |

**Supplementary Table 9:** Summary of known biology for the candidate genes identified. Evidence: n=nearest gene, e=eQTL, c=coding variation, g=GRAIL, o=other.

| Locus      | SNP        | Gene            | Evidence | Summary                                                                                                                                                                                                                                                                                                                                                                                                                                                                                                                  |
|------------|------------|-----------------|----------|--------------------------------------------------------------------------------------------------------------------------------------------------------------------------------------------------------------------------------------------------------------------------------------------------------------------------------------------------------------------------------------------------------------------------------------------------------------------------------------------------------------------------|
| <b>ALT</b> |            |                 |          |                                                                                                                                                                                                                                                                                                                                                                                                                                                                                                                          |
| 4q22       | rs6834314  | <i>HSD17B13</i> | ne       | Hydroxysteroid (17-beta) dehydrogenase 13. Highly expressed in liver and encodes enzyme that may be involved in metabolism androgen and steroidogenesis <sup>1</sup> .                                                                                                                                                                                                                                                                                                                                                   |
|            |            | <i>MAPK10</i>   | e        | Mitogen activated protein kinase-10. May be involved in cellular responses to inflammatory cytokines <sup>2</sup> .                                                                                                                                                                                                                                                                                                                                                                                                      |
| 8q24       | rs2954021  | <i>TRIB1</i>    | n        | Tribbles homolog-1. A serine/threonine kinase-like proteins activation of NF-KB and MAP kinases <sup>3</sup> . <i>TRIB1</i> binds JNK and P38, affects MAP kinase activity, and influences gene expression in TLR-mediated signalling pathways <sup>4</sup> . <i>TRIB1</i> variants strongly associated with triglyceride levels in GWA studies <sup>5</sup> .                                                                                                                                                           |
| 10q24      | rs10883437 | <i>CPN1</i>     | n        | Carboxypeptidase N, polypeptide 1 (also called kininase-1 and anaphylatoxin inactivator). Encodes the catalytic subunit of a plasma metallo-protease that regulates peptides such as kinins and anaphylatoxins <sup>6</sup> . Mutations in this gene are associated with angioedema and chronic urticaria <sup>7</sup> .                                                                                                                                                                                                 |
| 22q13      | rs738409   | <i>PNPLA3</i>   | nc       | Patatin-like phospholipase domain containing 3 (also called Adiponutrin). A membrane bound triacylglycerol lipase present in adipocytes <sup>8</sup> . Involved in energy utilisation / storage by adipocytes. Also strongly expressed in liver. Genetic variants in <i>PNPLA3</i> are associated with hepatic fat <sup>9</sup> and susceptibility to alcoholic liver disease <sup>10</sup> .                                                                                                                            |
|            |            | <i>SAMM50</i>   | c        | SAMM50 is a component of the sorting and assembly machinery (SAM) complex of the outer mitochondrial membrane. The SAM complex has a role in integrating beta-barrel proteins into the outer mitochondrial membrane <sup>11</sup> .                                                                                                                                                                                                                                                                                      |
| <b>ALP</b> |            |                 |          |                                                                                                                                                                                                                                                                                                                                                                                                                                                                                                                          |
| 1p36.12    | rs1976403  | <i>ALPL</i>     | o        | Alkaline phosphatase, liver/bone/kidney isoform. A glycosylated enzyme that is widely expressed, and primarily membrane bound. ALPL is the primary source of circulating ALP in plasma <sup>12</sup> .                                                                                                                                                                                                                                                                                                                   |
|            |            | <i>NBPF3</i>    | nce      | Neuroblastoma breakpoint family, member 3. The <i>NBPF</i> gene family are located primarily on regions of segmental duplications on chromosome 1. The proteins encoded are composed of repetitive elements and are of unknown function <sup>13</sup> . Genetic variation in <i>NBPF</i> genes associated with mental retardation <sup>14</sup> , autism <sup>15</sup> , schizophrenia <sup>16</sup> and several cancers, including neuroblastoma <sup>17</sup> and sarcoma <sup>18</sup> .                              |
| 2q24       | rs16856332 | <i>ABCB11</i>   | ng       | ATP-binding cassette transporter subfamily B, member 11, also called BSEP (Bile Salt Export Pump). <i>ABCB11</i> is responsible for the transport of taurocholate and other cholate conjugates from hepatocytes to bile. In humans. <i>ABCB11</i> activity is the major determinant of bile formation and bile flow <sup>19</sup> . Mutations in <i>ABCB11</i> cause progressive familial intrahepatic cholestasis type 2 (PFIC2) and are associated with increased risk of hepatocellular carcinoma <sup>20, 21</sup> . |
| 6p22       | rs1883415  | <i>ALDH5A1</i>  | e        | Aldehyde dehydrogenase 5 family, member A1. A mitochondrial succinic semialdehyde dehydrogenase involved in metabolism of the neurotransmitter GABA <sup>22</sup> . Mutations cause 4-hydroxybutyricaciduria, and lead to accumulation of GABA and related molecules with neuromodulatory properties, and a wide spectrum of neurological and psychiatric dysfunction <sup>23</sup> .                                                                                                                                    |

|        |            |                      |        |                                                                                                                                                                                                                                                                                                                                                                                                                                                                                                                                                                                                                                                           |
|--------|------------|----------------------|--------|-----------------------------------------------------------------------------------------------------------------------------------------------------------------------------------------------------------------------------------------------------------------------------------------------------------------------------------------------------------------------------------------------------------------------------------------------------------------------------------------------------------------------------------------------------------------------------------------------------------------------------------------------------------|
|        |            | <i>GPLD1</i>         | nc     | Glycosylphosphatidylinositol phospholipase D1. <i>GPLD1</i> is synthesised in liver and circulates in serum as a component of ApoA1 and ApoA4 containing HDL cholesterol particles <sup>24</sup> . Glycosylphosphatidylinositol phospholipases release proteins from glycosylphosphatidylinositol (GPI) anchors at the cell surface and thus influence cell surface binding of plasma proteins such as ALP, endoplasmic trafficking, and immune responses to pathogens <sup>25</sup> . Glycosylphosphatidylinositol phospholipases may also cleave GPIs to produce second messengers that mediate responses to insulin and other hormones <sup>26</sup> . |
| 8p23   | rs6984305  | <i>PPP1R3B</i>       | ne     | Glycogen-targeting subunit for phosphatase PP1. Facilitates interaction of PP1 with enzymes of glycogen metabolism and regulates PP1 activity <sup>27</sup> . Suppresses the rate at which PP1 dephosphorylates (inactivates) glycogen phosphorylase, enhances activation of glycogen synthase, and therefore limits glycogen breakdown. Its activity is inhibited by PYGL, resulting in inhibition of the glycogen synthase and glycogen phosphorylase phosphatase activities of PP1 <sup>28</sup> . Overexpression of <i>PPP1R3B</i> increases basal and insulin-stimulated glycogen synthesis in hepatocytes <sup>29</sup> .                           |
| 8q24   | rs2954021  | <i>TRIB1</i>         | n      | Tribbles homolog-1. A serine/threonine kinase-like protein activating NF-KB <sup>30</sup> and MAP kinases <sup>31</sup> . May influence gene expression in TLR-mediated and other signalling pathways <sup>32</sup> .                                                                                                                                                                                                                                                                                                                                                                                                                                     |
| 9q21   | rs10819937 | <i>ALDOB</i>         | o      | Fructose-1,6-bisphosphate aldolase B. Glycolytic enzyme that catalyzes the reversible conversion of fructose-1,6-bisphosphate to glyceraldehyde 3-phosphate and dihydroxyacetone phosphate <sup>33</sup> . Strongly expressed in adult liver, kidney and intestine. Mutations in <i>ALDOB</i> cause hereditary fructose intolerance, characterised by hypoglycaemia, hepatomegaly and liver dysfunction after fructose ingestion <sup>34, 35</sup> .                                                                                                                                                                                                      |
|        |            | <i>C9orf125</i>      | n      | Chromosome 9 open reading frame 125. Unknown function.                                                                                                                                                                                                                                                                                                                                                                                                                                                                                                                                                                                                    |
| 9q34   | rs579459   | <i>ABO</i>           | n      | ABO blood group (transferase A, alpha 1-3-N-acetylgalactosaminyltransferase; transferase B, alpha 1-3-galactosyltransferase). Encodes a glycosyltransferase which converts the H antigen (a cell surface carbohydrate sequence) into the A or B antigen <sup>36</sup> . <i>ABO</i> variants strongly associated with several phenotypes, including pancreatic <sup>37</sup> and gastric carcinoma <sup>38</sup> and auto-immune disease, and with ALP in GWA studies <sup>39</sup> .                                                                                                                                                                      |
| 10q21  | rs7923609  | <i>JMJD1C</i>        | n      | Jumonji domain containing 1C (also called thyroid receptor interacting protein 8, <i>TRIP8</i> ). Member of large family of jumonji proteins which have histone demethylase activity <sup>40</sup> . Jumonji proteins play a central role in epigenetic modification of DNA binding and chromatin structure, thereby regulating gene expression, including hormone-dependent transcriptional activation <sup>41</sup> .                                                                                                                                                                                                                                   |
|        |            | <i>NRBF2</i>         | e      | Nuclear receptor binding factor 2. May modulate transcriptional activation by nuclear receptors including PPARs, RARs and RXRs <sup>42</sup> .                                                                                                                                                                                                                                                                                                                                                                                                                                                                                                            |
| 11q12  | rs174601   | <i>C11orf10</i>      | e      | Chromosome 11 open reading frame 10. Unknown function                                                                                                                                                                                                                                                                                                                                                                                                                                                                                                                                                                                                     |
|        |            | <i>FADS1 / FADS2</i> | e / ne | <i>FADS1</i> : Fatty acid desaturase-1; <i>FADS2</i> : Fatty acid desaturase-2. <i>FADS1</i> and <i>FADS2</i> are components of a lipid metabolic pathway, strongly expressed in liver, which catalyzes the synthesis of highly unsaturated fatty acids (HUFA) such as arachidonic acid from omega-3 and omega-6 polyunsaturated fatty acids <sup>43</sup> . HUFA play pivotal roles in many processes including atherosclerosis, inflammation, neurologic development and membrane fluidity <sup>44</sup> .                                                                                                                                              |
| 11q.24 | rs2236653  | <i>ST3GAL4</i>       | n      | ST3 beta-galactoside alpha-2,3-sialyltransferase 4. Contributes to the incorporation of sialic acid residues into the terminal carbohydrate groups of circulating glycoproteins and glycolipids <sup>45</sup> . Subsequent time-dependent loss of sialic acid initiates programmed removal of circulating erythrocytes, platelets and plasma glycoproteins by exposing $\beta$ -galactose residues, enabling                                                                                                                                                                                                                                              |

|            |            |                |    |                                                                                                                                                                                                                                                                                                                                                                                                                                                                                                                                                                   |
|------------|------------|----------------|----|-------------------------------------------------------------------------------------------------------------------------------------------------------------------------------------------------------------------------------------------------------------------------------------------------------------------------------------------------------------------------------------------------------------------------------------------------------------------------------------------------------------------------------------------------------------------|
|            |            |                |    | recognition and phagocytosis by asialoglycoprotein receptors <sup>46, 47</sup> .                                                                                                                                                                                                                                                                                                                                                                                                                                                                                  |
| 16q22      | rs7186908  | <i>HPR</i>     | e  | Haptoglobin-related protein. Plasma protein which circulates in association with Apolipoprotein-A1, and which binds free plasma haemoglobin. May also play a role in innate immunity <sup>48</sup> .                                                                                                                                                                                                                                                                                                                                                              |
|            |            | <i>PMFBP1</i>  | n  | Polyamine modulated factor 1 binding protein 1. Function unknown.                                                                                                                                                                                                                                                                                                                                                                                                                                                                                                 |
| 17p13      | rs314253   | <i>ASGR1</i>   | o  | Asialoglycoprotein receptor 1. Cell surface receptor strongly expressed in liver. Binds plasma glycoproteins from which the terminal sialic acid residues on surface carbohydrate moieties have been removed; the receptor-liganded complex is then internalised by endocytosis <sup>46, 47</sup> .                                                                                                                                                                                                                                                               |
|            |            | <i>DLG4</i>    | n  | Discs, large homolog 4. Member of the membrane-associated guanylate kinase (MAGUK) family; may be involved in ion channel and other signalling processes <sup>49</sup> .                                                                                                                                                                                                                                                                                                                                                                                          |
| 19q13      | rs281377   | <i>FUT2</i>    | nc | Fucosyltransferase 2. Encodes alpha(1,2)fucosyltransferase, the enzyme responsible for the synthesis of H antigen, the precursor of ABO antigen in body fluids and on the intestinal mucosa <sup>50</sup> . Individuals homozygous for nonfunctional <i>FUT2</i> alleles fail to present ABO antigens in secretions ("nonsecretors") and on epithelial cells <sup>51</sup> . Variants in <i>FUT2</i> are associated with vitamin B <sub>12</sub> levels in GWA <sup>52</sup> , and with susceptibility to intestinal infections such as Norovirus <sup>53</sup> . |
| 20p11      | rs7267979  | <i>ABHD12</i>  | ne | Abhydrolase domain containing 12. Membrane protein with predicted monoacylglycerol lipase activity. Expressed in liver, kidney, brain, and elsewhere <sup>54</sup> . Function uncertain; proposed to involved in endocannabinoid signalling <sup>55</sup> .                                                                                                                                                                                                                                                                                                       |
|            |            | <i>GINS1</i>   | ce | GINS complex subunit 1. An essential subunit of the GINS complex, which plays an essential role in the initiation of DNA replication, and progression of DNA replication forks <sup>56</sup> .                                                                                                                                                                                                                                                                                                                                                                    |
|            |            | <i>PYGB</i>    | o  | Phosphorylase glycogen brain. A glycogen phosphorylase found predominantly in the brain, which catalyses the rate-determining step in glycogen degradation <sup>57</sup> .                                                                                                                                                                                                                                                                                                                                                                                        |
| <b>GGT</b> |            |                |    |                                                                                                                                                                                                                                                                                                                                                                                                                                                                                                                                                                   |
| 1p36.13    | rs1497406  | <i>C1orf89</i> | e  | Hypothetical protein of unknown function. Homologous with GTPases involved in mitochondrial trafficking <sup>58</sup> .                                                                                                                                                                                                                                                                                                                                                                                                                                           |
|            |            | <i>EPHA2</i>   | ne | Ephrin receptor A2. Membrane-bound tyrosine kinase, undergoes juxtacrine activation by Ephrin-A ligands presented on apposed cell surfaces <sup>59</sup> . Integral role in developmental events, angiogenesis and a wide range of malignancies <sup>60</sup> . Mutations and common variants associated with cortical cataract <sup>61</sup> .                                                                                                                                                                                                                   |
| 1p22       | rs12145922 | <i>CCBL2</i>   | e  | Cysteine conjugate-beta lyase 2. Encodes an aminotransferase that catalyzes transamination of L-kynurenine (an L-tryptophan metabolite) to form kynurenic acid <sup>62</sup> . Kynurenine pathway metabolites may be involved in neuronal signalling, and have been linked to epilepsy <sup>63</sup> , schizophrenia <sup>64</sup> and neurodegenerative disease <sup>65</sup> .                                                                                                                                                                                  |
|            |            | <i>PKN2</i>    | n  | Protein kinase N2. Cytoplasmic serine-threonine protein kinase, activated by lipids, particularly cardiolipin, other phospholipids and unsaturated fatty acids <sup>66</sup> . Variants in <i>PKN2</i> may be linked with diabetes <sup>67</sup> .                                                                                                                                                                                                                                                                                                                |
| 1p13       | rs1335645  | <i>CEPT1</i>   | ne | Choline/ethanolamine phosphotransferase-1. Encodes an enzyme which catalyses synthesis of phosphatidylcholines <sup>68</sup> .                                                                                                                                                                                                                                                                                                                                                                                                                                    |
|            |            | <i>DENND2D</i> | e  | DENN/MADD domain containing 2D. Unknown function.                                                                                                                                                                                                                                                                                                                                                                                                                                                                                                                 |
| 1q21       | rs10908458 | <i>DPM3</i>    | n  | Dolichyl-phosphate mannosyltransferase polypeptide 3. Subunit of dolichyl-phosphate mannosyltransferase complex which synthesises dolichol-phosphate mannose, a donor of mannosyl residues for post-translational modification of proteins in the endoplasmic reticulum <sup>69</sup> .                                                                                                                                                                                                                                                                           |



|      |            |                     |     |                                                                                                                                                                                                                                                                                                                                                                                                                                                                                                                                                                                                                                                                                          |
|------|------------|---------------------|-----|------------------------------------------------------------------------------------------------------------------------------------------------------------------------------------------------------------------------------------------------------------------------------------------------------------------------------------------------------------------------------------------------------------------------------------------------------------------------------------------------------------------------------------------------------------------------------------------------------------------------------------------------------------------------------------------|
|      |            | <i>EFNA1</i>        | ce  | Mutations in <i>DPM3</i> cause congenital disorders of glycosylation, with defective surface expression of GPI-anchored proteins, and multisystem abnormalities <sup>70</sup> . Ephrin-A1. Agonist of EPHA tyrosine kinase receptors. Anchored to cell membrane by a glycosylphosphatidylinositol linkage, and acts in juxtacrine manner <sup>71</sup> . Involved in developmental events, angiogenesis and oncogenesis <sup>72, 73</sup> .                                                                                                                                                                                                                                              |
|      |            | <i>PKLR</i>         | o   | Pyruvate kinase, liver and RBC. The protein encoded by this gene is a pyruvate kinase that catalyzes the transphosphorylation of phosphoenolpyruvate into pyruvate and ATP, which is the rate-limiting step of glycolysis <sup>74</sup> . Mutations in <i>PKLR</i> cause hereditary nonspherocytic hemolytic anemia <sup>75</sup> .                                                                                                                                                                                                                                                                                                                                                      |
| 2p23 | rs1260326  | <i>C2orf16</i>      | e   | Hypothetical protein C2orf16. Unknown function.                                                                                                                                                                                                                                                                                                                                                                                                                                                                                                                                                                                                                                          |
|      |            | <i>GCKR</i>         | nc  | Glucokinase (hexokinase 4) regulator. Regulatory protein: inhibits hepatic and pancreatic glucokinase <sup>76</sup> . Mutations in <i>GCKR</i> underlie maturity-onset diabetes of the young (MODY) <sup>77</sup> ; common variants are associated with triglyceride <sup>78</sup> , glucose <sup>79</sup> and CRP <sup>80</sup> levels and risk of non-alcoholic fatty liver disease <sup>81</sup> and T2D <sup>82</sup> .                                                                                                                                                                                                                                                              |
| 2q12 | rs13030978 | <i>MYO1B</i>        | ne  | Myosin-1B. Widely expressed myosin-I isoform that concentrates on endosomal and ruffling membranes. May play a role in membrane trafficking and dynamics, including the traffic of protein cargo in multivesicular endosomes <sup>83</sup> .                                                                                                                                                                                                                                                                                                                                                                                                                                             |
|      |            | <i>STAT4</i>        | e   | Signal transducer and activator of transcription 4. Encodes a member of the STAT family of transcription factors mediating responses to cytokines and growth factors <sup>84</sup> .                                                                                                                                                                                                                                                                                                                                                                                                                                                                                                     |
| 2q37 | rs2140773  | <i>EFHD1</i>        | ne  | EF-hand domain-containing protein 1. The EF hand domain is a helix-loop-helix structural domain found in a large family of calcium-binding proteins <sup>85</sup> . <i>EFHD1</i> expression is increased expression during neuronal differentiation <sup>86</sup> , but is of unknown function.                                                                                                                                                                                                                                                                                                                                                                                          |
|      |            | <i>LOC100129166</i> | c   | Hypothetical protein                                                                                                                                                                                                                                                                                                                                                                                                                                                                                                                                                                                                                                                                     |
| 3q26 | rs10513686 | <i>SLC2A2</i>       | nc  | Solute carrier family 2 (facilitated glucose transporter), member 2. Mediates bidirectional transport of glucose across cell membrane of hepatocytes <sup>87</sup> . Also responsible for uptake of glucose by pancreatic beta cells, and may comprise part of the glucose-sensing mechanism of the beta cell <sup>88</sup> . Participates in transport of glucose in the small intestine and kidney <sup>89</sup> . Mutations in <i>SLC2A2</i> underlie MODY[REF]; common variants are associated with levels of glucose <sup>79</sup> , cholesterol <sup>78</sup> , triglycerides <sup>78</sup> and pancreatic beta cell function <sup>79</sup> , and with risk of T2D <sup>82</sup> . |
| 4q31 | rs4547811  | <i>ZNF827</i>       | n   | Zinc finger protein 827. Expressed in liver and other tissues[REF]. Unknown function.                                                                                                                                                                                                                                                                                                                                                                                                                                                                                                                                                                                                    |
| 5p15 | rs6888304  | <i>CDH6</i>         | n   | Cadherin-6. Transmembrane membrane protein which acts as a calcium dependent cell-cell adhesion glycoprotein <sup>90</sup> . Cadherins mediate cell-cell binding and the maintenance of orderly structures such as epithelium <sup>91</sup> . Strong transcriptional expression of this gene has been observed in hepatocellular and renal carcinoma cell lines <sup>92</sup> . Hepatic <i>CDH6</i> is also upregulated after Hepatitis B infection <sup>93</sup> .                                                                                                                                                                                                                      |
| 5q11 | rs4074793  | <i>ITGA1</i>        | n   | Integrin, alpha 1. Subunit of integrin receptors, which selectively recognizes cell-adhesion sites provided by collagens, fibronectins and laminin <sup>94</sup> . Involved in cell-cell adhesion <sup>95</sup> , inflammation <sup>96</sup> and fibrosis <sup>97</sup> . Also involved in the early remodeling of osteoarthritic cartilage <sup>98</sup> . <i>ITGA1</i> -null mice show severe cartilage degradation and synovial hyperplasia <sup>99</sup> . Common variants associated with bone-mineral density <sup>100</sup> .                                                                                                                                                     |
| 6p12 | rs9296736  | <i>C6orf142</i>     | ne  | Hypothetical protein C6orf142. Unknown function.                                                                                                                                                                                                                                                                                                                                                                                                                                                                                                                                                                                                                                         |
| 7q11 | rs17145750 | <i>MLXIPL</i>       | nce | MLX interacting protein-like. Transcription factor of the Myc/Max/Mad superfamily strongly expressed in liver <sup>101</sup> . Binds and activates, in a glucose-dependent manner, carbohydrate response                                                                                                                                                                                                                                                                                                                                                                                                                                                                                 |

|          |            |                 |     |                                                                                                                                                                                                                                                                                                                                                                                                                                                                                                                                                                                                                                             |
|----------|------------|-----------------|-----|---------------------------------------------------------------------------------------------------------------------------------------------------------------------------------------------------------------------------------------------------------------------------------------------------------------------------------------------------------------------------------------------------------------------------------------------------------------------------------------------------------------------------------------------------------------------------------------------------------------------------------------------|
|          |            |                 |     | elements (ChoRE) in the promoters of triglyceride synthesis genes <sup>102</sup> . Common variants in <i>MLXIPL</i> are associated with triglyceride levels in GWA studies <sup>103</sup> .Kooner et al.                                                                                                                                                                                                                                                                                                                                                                                                                                    |
| 10q23    | rs754466   | <i>DLG5</i>     | n   | Discs, large homolog 5. Encodes a member of the membrane-associated guanylate kinase (MAGUK) superfamily, which function as scaffolding molecules at sites of cell-cell contact <sup>104</sup> . <i>DLG5</i> localizes to the plasma membrane and cytoplasm, interacts with components of adherens junctions and the cytoskeleton, and may function in the transmission of extracellular signals to the cytoskeleton and regulation of NFkB activation or caspase activation. Genetic variants in <i>DLG5</i> have been associated with inflammatory bowel disease in some studies <sup>105</sup> .                                         |
| 12q24    | rs7310409  | <i>C12orf27</i> | e   | Hypothetical protein C12orf27. Unknown function.                                                                                                                                                                                                                                                                                                                                                                                                                                                                                                                                                                                            |
|          |            | <i>HNF1A</i>    | nc  | Hepatic transcription factor. Key regulator of transcription of several liver-specific genes. Mutations in <i>HNF1A</i> are a cause of maturity onset diabetes of the young type 3 (MODY3) <sup>106</sup> and hepatic adenomas <sup>107</sup> . Common variants in <i>HNF1A</i> associated with risk of T2D <sup>82</sup> , and with levels of glucose <sup>79</sup> , CRP <sup>80</sup> , and lipids <sup>78</sup> .                                                                                                                                                                                                                       |
| 14q32    | rs944002   | <i>C14orf73</i> | nc  | Hypothetical protein C14orf73. Strongly expressed in liver, but unknown function[REF]. Sequence homology with SEC6, a protein that interacts with the actin cytoskeleton and vesicle transport machinery, and which is involved in targeting exocytic vesicles to docking sites on the plasma membrane <sup>108</sup> .                                                                                                                                                                                                                                                                                                                     |
| 15q21    | rs339969   | <i>RORA</i>     | n   | RAR-related orphan receptor A. Member of the NR1 subfamily of nuclear hormone receptors, regulating expression of numerous metabolic and inflammatory genes including including <i>NF-kB</i> , apolipoproteins <i>AI</i> , <i>APOA5</i> , <i>CIII</i> , <i>CYP7A1</i> and <i>PPARGgamma</i> <sup>109-111</sup> . <i>RORA</i> is widely expressed, particularly neuronal and liver tissues <sup>112</sup> . The staggerer ( <i>Rora<sup>sg/sg</sup></i> ) mutant mouse shows extensive cerebellar neurodegeneration and abnormal innate immunity characterized by an increased susceptibility to systemic LPS treatment <sup>113-115</sup> . |
| 15q23    | rs8038465  | <i>CD276</i>    | ne  | CD276 molecule (also called B7H3). Ubiquitously expressed, including liver <sup>116</sup> . Regulates immune responses, including induction of cytotoxic T-cells, interferon gamma production and NK cell activity <sup>117</sup> .                                                                                                                                                                                                                                                                                                                                                                                                         |
| 16q23    | rs4581712  | <i>DYNLRB2</i>  | n   | Dynein, light chain, roadblock-type 2. May be involved in assembly and motor function of dynein, which plays a central role in cell division and intracellular transport <sup>118</sup> . May also influence TGF-beta signalling <sup>119</sup> .                                                                                                                                                                                                                                                                                                                                                                                           |
| 17q24    | rs9913711  | <i>FLJ37644</i> | e   | Hypothetical gene.                                                                                                                                                                                                                                                                                                                                                                                                                                                                                                                                                                                                                          |
|          |            | <i>SOX9</i>     | n   | SRY (sex determining region Y)-box 9. Transcriptional regulator with an important role in sex and skeletal development <sup>120</sup> . Expressed in the genital ridge, in chondrocytes and in other tissues <sup>121</sup> . Involved in differentiation of Sertoli cells, enhancer expression of <i>COL2A1</i> , required for cartilage formation, and influences BMP2 and Indian hedgehog (IHH) signaling pathways in osteogenic cells <sup>122, 123</sup> . Mutations lead to the skeletal malformation syndrome campomelic dysplasia, and may be accompanied by sex reversal <sup>124</sup> .                                          |
| 18q21.31 | rs12968116 | <i>ATP8B1</i>   | ncg | ATPase, class I, type 8B, member 1. An ATPase that transports aminophospholipids from the outer to the inner leaflet of membranes, and maintains asymmetric distribution of phospholipids in the canicular membrane <sup>125</sup> . Involved in transport of bile acids into the canaliculus, and uptake of bile acids from intestinal lumen <sup>126</sup> . Mutations in <i>ATP8B1</i> result in progressive familial intrahepatic cholestasis type 1, and are associated with raised GGT <sup>127</sup> .                                                                                                                               |
| 18q21.32 | rs4503880  | <i>NEDD4L</i>   | n   | Neural precursor cell expressed, developmentally down-regulated 4-like. Encodes a ubiquitin-protein ligase which inhibits TGF-beta signalling, and promotes internalization of various plasma                                                                                                                                                                                                                                                                                                                                                                                                                                               |

|          |           |                       |              |                                                                                                                                                                                                                                                                                                                                                                                                                                                                                                                                                                                                                                                                                                                                              |
|----------|-----------|-----------------------|--------------|----------------------------------------------------------------------------------------------------------------------------------------------------------------------------------------------------------------------------------------------------------------------------------------------------------------------------------------------------------------------------------------------------------------------------------------------------------------------------------------------------------------------------------------------------------------------------------------------------------------------------------------------------------------------------------------------------------------------------------------------|
|          |           |                       |              | membrane proteins channels, including epithelial sodium channel. Variants in <i>NEDD4L</i> are associated with salt sensitivity and raised blood pressure <sup>128</sup> .                                                                                                                                                                                                                                                                                                                                                                                                                                                                                                                                                                   |
| 19q13    | rs516246  | <i>FUT2</i>           | nc           | Fucosyltransferase 2. Encodes alpha(1,2)fucosyltransferase, the enzyme responsible for the synthesis of H antigen, the precursor of ABO antigen in body fluids and on the intestinal mucosa <sup>50</sup> . Individuals homozygous for nonfunctional <i>FUT2</i> alleles fail to present ABO antigens in secretions ("nonsecretors") and on epithelial cells <sup>51</sup> . Variants in <i>FUT2</i> are associated with vitamin B <sub>12</sub> levels in GWA <sup>52</sup> , and with susceptibility to intestinal infections such as Norovirus <sup>53</sup> .                                                                                                                                                                            |
| 22q11.21 | rs1076540 | <i>MICAL3</i>         | ne           | Microtubule associated monooxygenase, calponin and LIM domain containing 3. <i>MICAL</i> molecules are associated with the cytoskeleton and influences F-actin disassembly and cytoskeletal remodelling <sup>129</sup> . Members of the <i>MICAL</i> family play a key role in a number of processes dependent on F-actin, including endocytosis and semaphorin mediated axon guidance <sup>130</sup> .                                                                                                                                                                                                                                                                                                                                      |
| 22q11.23 | rs2739330 | <i>DDT / DDTL</i>     | <i>e / e</i> | <i>DDT</i> : D-dopachrome tautomerase. <i>DDTL</i> : D-dopachrome tautomerase-like. Converts D-dopachrome to 5,6-dihydroxyindole <sup>131</sup> . May act synergistically with MIF to promote angiogenic factors such as VEGF <sup>132</sup> .                                                                                                                                                                                                                                                                                                                                                                                                                                                                                               |
|          |           | <i>GSTT1 / GSTT2B</i> | <i>e / n</i> | <i>GSTT1</i> : Glutathione S-transferase theta 1; <i>GSTT2B</i> : Glutathione S-transferase theta 2B. The glutathione S-transferases conjugate reduced glutathione to a wide number of exogenous and endogenous chemicals, and are key enzymes in eliminating carcinogens and harmful macromolecules <sup>133</sup> . <i>GSTT1</i> , <i>GSTT2</i> and <i>GSTT2B</i> are highly homologous and located in close proximity <sup>134</sup> .                                                                                                                                                                                                                                                                                                    |
|          |           | <i>MIF</i>            | <i>e</i>     | Macrophage inhibitory factor. Pleiotropic cytokine with a broad range of pro-inflammatory actions, and produced involved by a variety of cell types. In addition influences cell proliferation, angiogenesis and neoplasia <sup>132</sup> .                                                                                                                                                                                                                                                                                                                                                                                                                                                                                                  |
| 22q11.23 | rs2073398 | <i>GGT1</i>           | ne           | Gamma-glutamyltransferase 1. GGT is a transmembrane protein, widely expressed, and found at highest levels in liver, kidney, salivary glands and other tissues involved in absorption and secretion <sup>135</sup> . GGT cleaves extracellular glutathione (GSH) to generate cysteine, the rate-limiting precursor for synthesis of intracellular GSH <sup>136</sup> ; GGT is thus an essential component of cellular antioxidant defense mechanisms. GGT also acts to conserve glutathione from luminal spaces such as renal tubules <sup>135</sup> . <i>GGT(-/-)</i> mice show intracellular GSH deficiency, growth retardation, reduced hepatic fat and glycogen, impaired oxidative phosphorylation and die prematurely <sup>137</sup> . |
|          |           | <i>GGTLC2</i>         | <i>e</i>     | A light chain-only GGT which contain a region corresponding to the <i>GGT1</i> light chain, but which lack the heavy chain region and thus circulates in plasma rather than being membrane bound <sup>135</sup> .                                                                                                                                                                                                                                                                                                                                                                                                                                                                                                                            |

**Supplementary Table 10:** Coding SNPs in LD at  $r^2 > 0.5$  (HapMap<sup>138</sup> or 1000G CEU<sup>139</sup>) with sentinel SNPs identified in the liver marker genome-wide association study.  $P_{\text{pheno}}$  is for the association of coding SNP with phenotype;  $P_{\text{hetero}}$  is for comparison of effect size on phenotype between sentinel SNP and coding SNP;  $r^2$  is LD between sentinel and coding SNP (HapMap CEU or 1000G data). Genes with coding SNPs in  $r^2 > 0.5$  and with phenotype  $P_{\text{hetero}} > 1.2 \times 10^{-3}$  (ie  $P < 0.05$  after correction for 42 tests) represent good candidates for mediators of the liver marker association observed and are highlighted yellow. Genes failing these parameters are highlighted grey. Coding SNPs identified through 1000G and not genotyped or imputed in the GWA study are highlighted green; association with phenotype and  $P_{\text{hetero}}$  are not available (NA).

| Region     | Sentinel SNP | Coding SNP | Source | $r^2$ | Alleles (Ref / Effect) | EAF  | N     | $P_{\text{pheno}}$    | $P_{\text{hetero}}$  | Gene                | Amino acid change | Amino acid |
|------------|--------------|------------|--------|-------|------------------------|------|-------|-----------------------|----------------------|---------------------|-------------------|------------|
| <b>ALT</b> |              |            |        |       |                        |      |       |                       |                      |                     |                   |            |
| 22q13      | rs738409     | rs738409   | HapMap | 1.00  | C / G                  | 0.23 | 55305 | $1.2 \times 10^{-45}$ | 1.00                 | <i>PNPLA3</i>       | I148M             | Ile-Met    |
| 22q13      | rs738409     | rs3761472  | HapMap | 0.54  | A / G                  | 0.19 | 55437 | $3.7 \times 10^{-29}$ | 0.06                 | <i>SAMM50</i>       | D110G             | Asp-Gly    |
| <b>ALP</b> |              |            |        |       |                        |      |       |                       |                      |                     |                   |            |
| 1p36.12    | rs1976403    | rs1827293  | HapMap | 0.85  | G / A                  | 0.52 | 31891 | $9.9 \times 10^{-31}$ | $3.9 \times 10^{-3}$ | <i>NBPF3</i>        | Y114C             | Tyr-Cys    |
| 1p36.12    | rs1976403    | rs12043777 | 1000G  | 0.53  | C / G                  | 0.38 | NA    | NA                    | NA                   | <i>NBPF3</i>        | D444E             | Asp-Glu    |
| 6p22       | rs1883415    | rs2760118  | HapMap | 0.71  | C / T                  | 0.32 | 12095 | $1.3 \times 10^{-2}$  | $1.8 \times 10^{-4}$ | <i>ALDH5A1</i>      | H180Y             | His-Tyr    |
| 6p22       | rs1883415    | rs1126617  | HapMap | 1.00  | C / T                  | 0.33 | 32572 | $2.8 \times 10^{-25}$ | 0.83                 | <i>GPLD1</i>        | V30I              | Val-Ile    |
| 10q21      | rs7923609    | rs1935     | HapMap | 1.00  | C / G                  | 0.50 | 32602 | $1.1 \times 10^{-18}$ | 0.65                 | <i>JMJD1C</i>       | E2298D            | Glu-Asp    |
| 19q13      | rs281377     | rs601338   | HapMap | 0.78  | A / G                  | 0.46 | 32294 | $1.4 \times 10^{-14}$ | 0.52                 | <i>FUT2</i>         | W154X             | Trp-AMB    |
| 19q13      | rs281377     | rs602662   | HapMap | 0.53  | A / G                  | 0.39 | 32454 | $1.9 \times 10^{-13}$ | 0.48                 | <i>FUT2</i>         | G258S             | Gly-Ser    |
| 20p11      | rs7267979    | rs6076347  | HapMap | 0.76  | A / G                  | 0.48 | 32644 | $5.0 \times 10^{-5}$  | 0.24                 | <i>GINS1</i>        | V97I              | Val-Ile    |
| <b>GGT</b> |              |            |        |       |                        |      |       |                       |                      |                     |                   |            |
| 1q21       | rs10908458   | rs4745     | HapMap | 0.69  | T / A                  | 0.48 | 26670 | $1.8 \times 10^{-4}$  | 0.41                 | <i>EFNA1</i>        | D159V             | Asp-Val    |
| 2p23       | rs1260326    | rs1260326  | HapMap | 1.00  | C / T                  | 0.38 | 57623 | $4.4 \times 10^{-13}$ | 1.00                 | <i>GCKR</i>         | P446L             | Pro-leu    |
| 2q37       | rs2140773    | rs4072149  | HapMap | 0.66  | T / C                  | 0.50 | 57459 | $4.7 \times 10^{-8}$  | 0.29                 | <i>LOC100129166</i> | W29R              | Trp-Arg    |
| 3q26       | rs10513686   | rs5400     | HapMap | 1.00  | G / A                  | 0.14 | 57682 | $2.4 \times 10^{-10}$ | 0.95                 | <i>SLC2A2</i>       | T110I             | Thr-Ile    |
| 7q11       | rs17145750   | rs35332062 | 1000G  | 0.94  | G / A                  | 0.14 | NA    | NA                    | NA                   | <i>MLXIPL</i>       | A358V             | Ala-Val    |
| 7q11       | rs17145750   | rs3812316  | 1000G  | 0.94  | C / G                  | 0.14 | NA    | NA                    | NA                   | <i>MLXIPL</i>       | Q241H             | Gln-His    |
| 12q24      | rs7310409    | rs1169288  | HapMap | 0.62  | C / A                  | 0.72 | 54604 | $1.4 \times 10^{-42}$ | 0.43                 | <i>HNF1A</i>        | I27L              | Ile-Leu    |
| 12q24      | rs7310409    | rs2464196  | HapMap | 0.56  | A / G                  | 0.72 | 57559 | $8.3 \times 10^{-38}$ | 0.52                 | <i>HNF1A</i>        | S487N             | Ser-Asp    |
| 14q32      | rs944002     | rs10131298 | HapMap | 0.86  | A / T                  | 0.84 | 27588 | $1.8 \times 10^{-23}$ | 0.14                 | <i>C14orf73</i>     | L185H             | Leu-His    |
| 14q32      | rs944002     | rs2297067  | HapMap | 1.00  | C / T                  | 0.19 | 52449 | $1.9 \times 10^{-28}$ | 0.85                 | <i>C14orf73</i>     | R77W              | Arg-Trp    |
| 14q32      | rs944002     | rs2297066  | 1000G  | 1.00  | C / G                  | 0.22 | NA    | NA                    | NA                   | <i>C14orf73</i>     | E93D              | Asp-Glu    |
| 18q21.31   | rs12968116   | rs12968116 | HapMap | 1.00  | T / C                  | 0.88 | 48901 | $2.0 \times 10^{-8}$  | 1.00                 | <i>ATP8B1</i>       | R952Q             | Arg-Gln    |
| 19q13      | rs516246     | rs601338   | HapMap | 1.00  | G / A                  | 0.54 | 57331 | $4.5 \times 10^{-8}$  | 0.65                 | <i>FUT2</i>         | W154X             | Trp-AMB    |
| 19q13      | rs516246     | rs602662   | HapMap | 0.76  | G / A                  | 0.61 | 57441 | $3.7 \times 10^{-8}$  | 0.72                 | <i>FUT2</i>         | G258S             | Gly-Ser    |



**Supplementary Table 11:** Relationship between sentinel SNPs in the liver marker GWA study, and expression of cis genes ( $\pm 1\text{MB}$ ) in liver. Results filtered at  $P < 3 \times 10^{-5}$  for association of sentinel SNP with transcript expression ( $P < 0.05$  after Bonferroni correction for 1814 SNP-transcript associations). Genes with  $r^2 > 0.5$  and  $P_{\text{hetero}} > 1.2 \times 10^{-3}$  (ie  $P < 0.05$  after correction for 42 tests) represent good candidates for mediators of the liver marker association observed and are highlighted yellow. Genes failing these parameters are highlighted grey.

| Locus      | Sentinel SNP | Transcript | Gene     | Direction | $P_{\text{SS-expression}}$ | $P_{\text{SS-pheno}}$ | Transcript SNP | $P_{\text{TS-expression}}$ | $P_{\text{TS-pheno}}$ | $r^2$ | Expression $P_{\text{hetero}}$ | Phenotype $P_{\text{hetero}}$ |
|------------|--------------|------------|----------|-----------|----------------------------|-----------------------|----------------|----------------------------|-----------------------|-------|--------------------------------|-------------------------------|
| <b>ALT</b> |              |            |          |           |                            |                       |                |                            |                       |       |                                |                               |
| 4q22       | rs6834314    | NM_138980  | MAPK10   | ↑         | 1.9E-06                    | 3.1E-09               | rs6834314      | 1.9E-06                    | 3.1E-09               | 1.00  | 1.00                           | 1.00                          |
| 10q24      | rs10883437   | NM_018294  | CWF19L1  | ↓         | 2.0E-06                    | 4.0E-09               | rs12784396     | 5.4E-32                    | 2.7E-08               | 0.24  | 2.1E-06                        | 0.81                          |
| <b>ALP</b> |              |            |          |           |                            |                       |                |                            |                       |       |                                |                               |
| 6p22       | rs1883415    | NM_001080  | ALDH5A1  | ↓         | 1.9E-17                    | 5.6E-26               | rs1883415      | 1.9E-17                    | 5.6E-26               | 1.00  | 1.00                           | 1.00                          |
| 8p23       | rs6984305    | NM_024607  | PPP1R3B  | ↑         | 3.3E-11                    | 2.1E-10               | rs4240624      | 1.1E-16                    | 5.4E-10               | 0.74  | 0.08                           | 0.90                          |
| 11q12      | rs174601     | NM_013402  | FADS1    | ↓         | 9.0E-11                    | 1.3E-08               | rs174549       | 2.1E-17                    | 5.9E-08               | 0.67  | 0.34                           | 0.78                          |
| 11q12      | rs174601     | NM_004265  | FADS2    | ↓         | 1.9E-05                    | 1.3E-08               | rs968567       | 8.7E-09                    | 1.3E-03               | 0.55  | 0.85                           | 0.59                          |
| 20p11      | rs7267979    | NM_015600  | ABHD12   | ↓         | 2.8E-110                   | 7.4E-10               | rs3761117      | 1.6E-111                   | 2.7E-09               | 0.95  | 0.88                           | 0.80                          |
| <b>GGT</b> |              |            |          |           |                            |                       |                |                            |                       |       |                                |                               |
| 1p36.13    | rs1497406    | NM_030907  | C1orf89  | ↓         | 1.4E-12                    | 3.3E-19               | rs1008529      | 6.9E-17                    | 3.1E-11               | 0.52  | 0.22                           | 0.20                          |
| 1p36.13    | rs1497406    | NM_004431  | EPHA2    | ↓         | 6.7E-22                    | 3.3E-19               | rs7538216      | 5.5E-23                    | 9.8E-17               | 0.95  | 0.84                           | 0.75                          |
| 2p23       | rs1260326    | AL117421   | IFT172   | ↓         | 1.0E-29                    | 4.4E-13               | rs6547626      | 3.8E-88                    | 1.5E-06               | 0.41  | 8.2E-09                        | 0.08                          |
| 2p23       | rs1260326    | NM_032266  | C2orf16  | ↓         | 7.3E-06                    | 4.4E-13               | rs1260326      | 7.3E-06                    | 4.4E-13               | 1.00  | 1.00                           | 1.00                          |
| 2q37       | rs2140773    | NM_025202  | EFHD1    | ↑         | 4.0E-82                    | 1.2E-09               | rs13395911     | 1.7E-84                    | 2.7E-09               | 0.97  | 0.84                           | 0.97                          |
| 5q11       | rs4074793    | NM_181501  | ITGA1    | ↓         | 1.7E-09                    | 3.7E-10               | rs1047483      | 3.6E-14                    | 0.97                  | 0.00  | 0.16                           | 1.3E-11                       |
| 6p12       | rs9296736    | NM_138569  | C6orf142 | ↓         | 1.6E-118                   | 2.9E-09               | rs9349693      | 5.1E-123                   | 6.8E-09               | 0.97  | 0.96                           | 0.90                          |
| 12q24      | rs7310409    | NM_178513  | C12orf27 | ↓         | 2.7E-05                    | 1.1E-44               | rs7310409      | 2.7E-05                    | 1.1E-44               | 1.00  | 1.00                           | 1.00                          |
| 15q23      | rs8038465    | NM_025240  | CD276    | ↑         | 1.2E-07                    | 1.6E-08               | rs6495075      | 7.8E-08                    | 2.5E-04               | 0.98  | 0.98                           | 0.01                          |
| 17q24      | rs9913711    | AK056229   | FLJ37644 | ↓         | 2.3E-13                    | 1.0E-07               | rs9913936      | 1.3E-13                    | 3.8E-07               | 0.98  | 0.95                           | 0.79                          |
| 22q11.23   | rs2739330    | NM_000853  | GSTT1    | ↓         | 1.0E-34                    | 1.9E-09               | rs4822450      | 1.0E-70                    | 4.4E-08               | 0.41  | 0.09                           | 0.03                          |
| 22q11.23   | rs2739330    | NM_002415  | MIF      | ↑         | 2.2E-35                    | 1.9E-09               | rs5760098      | 1.4E-75                    | 2.0E-05               | 0.55  | 0.02                           | 0.63                          |
| 22q11.23   | rs2739330    | NM_001355  | DDT      | ↑         | 5.4E-70                    | 1.9E-09               | rs5760098      | 8.8E-138                   | 2.0E-05               | 0.55  | 0.07                           | 0.63                          |
| 22q11.23   | rs2739330    | NM_000854  | GSTT2    | ↑         | 7.2E-48                    | 1.9E-09               | rs5760101      | 8.0E-120                   | 4.3E-04               | 0.55  | 1.2E-03                        | 0.52                          |

**Sentinel SNP:** top ranking SNP associated with liver marker levels in the genome-wide association study; **Transcript SNP:** the cis-SNP most closely associated with expression of the respective transcript in the expression study. **Direction:** direction of change in transcript expression for the allele associated with raised liver marker levels.  **$P_{\text{SS-expression}}$ :** P value for association of sentinel SNP with transcript expression;  **$P_{\text{TS-expression}}$ :** P value for association of transcript SNP with transcript expression.  **$P_{\text{SS-pheno}}$ :** P value for association of sentinel SNP with liver marker;  **$P_{\text{TS-pheno}}$ :** P value for association of transcript SNP with liver marker. **Expression  $P_{\text{hetero}}$**  is for the comparison of effect sizes on transcript expression between the sentinel and transcript SNPs; **Phenotype  $P_{\text{hetero}}$**  is for the comparison of effect sizes on liver marker levels between the sentinel and transcript SNPs. LD between sentinel and coding SNPs given as  $r^2$ , and calculated from HapMap CEU population.

**Supplementary Table 12:** Relationship between sentinel SNPs identified in the liver marker GWA study, and expression of cis genes ( $\pm 1$ MB) in peripheral blood leucocytes (deCODE)<sup>140</sup>. Results filtered at  $P < 7 \times 10^{-5}$  for association of sentinel SNP with transcript expression ( $P < 0.05$  after Bonferroni correction for 675 SNP-transcript associations tested). Genes with  $r^2 > 0.5$  and  $P_{\text{hetero}} > 1.2 \times 10^{-3}$  (ie  $P < 0.05$  after correction for 42 tests) represent good candidates for mediators of the liver marker association observed and are highlighted yellow. Genes failing these parameters are highlighted grey.

| Locus      | Sentinel SNP | Transcript | Gene                          | Direction | $P_{\text{SS-expression}}$ | $P_{\text{SS-pheno}}$ | Transcript SNP | $P_{\text{TS-expression}}$ | $P_{\text{TS-pheno}}$ | $r^2$ | Expression $P_{\text{hetero}}$ | Phenotype $P_{\text{hetero}}$ |
|------------|--------------|------------|-------------------------------|-----------|----------------------------|-----------------------|----------------|----------------------------|-----------------------|-------|--------------------------------|-------------------------------|
| <b>ALT</b> |              |            |                               |           |                            |                       |                |                            |                       |       |                                |                               |
| 4q22       | rs6834314    | NM_178135  | <i>HSD17B13</i>               | ↓         | 1.2E-39                    | 3.1E-09               | rs13102451     | 1.2E-39                    | 1.5E-07               | 1.00  | 1.00                           | 0.95                          |
| 10q24      | rs10883437   | NM_018294  | <i>CWF19L1</i>                | ↓         | 2.5E-05                    | 4.0E-09               | rs11597086     | 9.8E-22                    | 1.3E-08               | 0.34  | 6.2E-04                        | 0.97                          |
| <b>ALP</b> |              |            |                               |           |                            |                       |                |                            |                       |       |                                |                               |
| 11q12      | rs174601     | NM_013402  | <i>FADS1</i>                  | ↑         | 1.7E-13                    | 1.3E-08               | rs968567       | 1.7E-21                    | 1.3E-03               | 0.31  | 0.02                           | 0.51                          |
| 11q12      | rs174601     | NM_004265  | <i>FADS2</i>                  | ↑         | 8.2E-80                    | 1.3E-08               | rs968567       | 5.1E-195                   | 1.3E-03               | 0.31  | 3.4E-12                        | 0.51                          |
| 11q12      | rs174601     | NM_014206  | <i>C11orf10</i>               | ↑         | 3.3E-05                    | 1.3E-08               | rs174538       | 8.7E-06                    | 2.4E-07               | 0.76  | 0.87                           | 0.66                          |
| 16q22      | rs7186908    | NM_005143  | <i>HP</i>                     | ↓         | 2.7E-18                    | 4.8E-09               | rs12325142     | 1.3E-61                    | 1.3E-06               | 0.39  | 0.005                          | 0.23                          |
| 17p13      | rs314253     | NM_015362  | <i>C17orf81</i>               | ↑         | 6.3E-07                    | 8.4E-12               | rs2074217      | 7.8E-35                    | 1.1E-03               | 0.11  | 2.5E-06                        | 0.94                          |
| 17p13      | rs314253     | NM_080913  | <i>ASGR2</i>                  | ↑         | 3.3E-05                    | 8.4E-12               | rs314239       | 1.1E-28                    | 5.7E-02               | 0.06  | 6.3E-06                        | 8.1E-04                       |
| <b>GGT</b> |              |            |                               |           |                            |                       |                |                            |                       |       |                                |                               |
| 1p36.13    | rs1497406    | NM_030907  | <i>C1orf89</i>                | ↓         | 1.1E-13                    | 3.3E-19               | rs1007887      | 1.2E-16                    | 1.1E-16               | 0.90  | 0.47                           | 0.80                          |
| 1p13       | rs1335645    | NM_024901  | <i>DENND2D</i>                | ↑         | 2.3E-07                    | 7.9E-09               | rs1043096      | 2.2E-07                    | 8.5E-09               | 1.00  | 0.99                           | 0.98                          |
| 2p23       | rs1260326    | AL117421   | <i>IFT172</i>                 | ↓         | 1.4E-57                    | 4.4E-13               | rs1260341      | 1.0E-256                   | 5.9E-07               | 0.50  | 6.5E-11                        | 0.26                          |
| 10q23      | rs754466     | NM_004747  | <i>DLG5</i>                   | ↑         | 1.9E-05                    | 7.0E-10               | rs1248631      | 8.4E-62                    | 7.1E-01               | 0.07  | 5.1E-12                        | 2.2E-04                       |
| 22q11.23   | rs2739330    | NM_000853  | <i>GSTT1</i>                  | ↓         | 4.7E-83                    | 1.9E-09               | rs407257       | 4.8E-185                   | 1.5E-07               | 0.73  | 1.2E-08                        | 0.87                          |
| 22q11.23   | rs2739330    | NM_000854  | <i>GSTT2</i><br><i>GSTT2B</i> | ↑         | 2.9E-05                    | 1.9E-09               | rs9624364      | 5.7E-29                    | 3.4E-03               | 0.07  | 0                              | 0.64                          |
| 22q11.23   | rs2739330    | NM_001355  | <i>DDT, DDTL</i>              | ↓         | 1.4E-44                    | 1.9E-09               | rs5760147      | 2.7E-51                    | 5.5E-09               | 0.93  | 0.18                           | 0.98                          |
| 22q11.23   | rs2073398    | NM_013421  | <i>GGT1,</i><br><i>GGTLC2</i> | ↓         | 2.7E-12                    | 3.5E-109              | rs5751901      | 1.9E-12                    | 8.2E-101              | 0.96  | 0.90                           | 0.17                          |

Abbreviations are as for Supplementary Table 11.

**Supplementary Table 13:** Relationship between sentinel SNPs identified in the liver marker GWA study, and expression of cis genes ( $\pm 1\text{MB}$ ) in adipose tissue (deCODE)<sup>140</sup> Results filtered at  $P < 7 \times 10^{-5}$  for association of sentinel SNP with transcript expression ( $P < 0.05$  after Bonferroni correction for 675 SNP-transcript associations). Genes with  $r^2 > 0.5$  and  $P_{\text{hetero}} > 1.2 \times 10^{-3}$  (ie  $P < 0.05$  after correction for 42 tests) are good candidates for mediators of the liver marker association and are highlighted yellow. Genes failing these parameters are highlighted grey.

| Locus      | Sentinel SNP | Transcript  | Gene            | Direction | $P_{\text{SS-expression}}$ | $P_{\text{SS-pheno}}$ | Transcript SNP | $P_{\text{TS-expression}}$ | $P_{\text{TS-pheno}}$ | $r^2$ | Expression $P_{\text{hetero}}$ | Phenotype $P_{\text{hetero}}$ |
|------------|--------------|-------------|-----------------|-----------|----------------------------|-----------------------|----------------|----------------------------|-----------------------|-------|--------------------------------|-------------------------------|
| <b>ALT</b> |              |             |                 |           |                            |                       |                |                            |                       |       |                                |                               |
| 4q22       | rs6834314    | NM_178135   | <i>HSD17B13</i> | ↓         | 2.1E-12                    | 3.1E-09               | rs6531968      | 1.1E-37                    | 1.9E-05               | 0.23  | 0.003                          | 0.04                          |
| 10q24      | rs10883437   | NM_018294   | <i>CWF19L1</i>  | ↓         | 1.7E-15                    | 4.0E-09               | rs11597086     | 1.1E-69                    | 1.3E-08               | 0.34  | 2.2E-06                        | 0.97                          |
| <b>ALP</b> |              |             |                 |           |                            |                       |                |                            |                       |       |                                |                               |
| 6p22       | rs1883415    | NM_001080   | <i>ALDH5A1</i>  | ↓         | 2.8E-07                    | 5.6E-26               | rs13218564     | 4.3E-09                    | 5.1E-01               | 0.39  | 0.73                           | 2.2E-11                       |
| 6p22       | rs1883415    | NM_177483   | <i>GPLD1</i>    | ↓         | 5.9E-07                    | 5.6E-26               | rs2744576      | 4.2E-10                    | 7.7E-01               | 0.33  | 0.50                           | 4.7E-13                       |
| 9q21       | rs10819937   | NM_000035   | <i>ALDOB</i>    | ↓         | 2.3E-25                    | 2.0E-08               | rs2183745      | 9.9E-60                    | 2.4E-08               | 0.39  | 0.06                           | 0.16                          |
| 9q21       | rs10819937   | NM_003452   | <i>ZNF189</i>   | ↓         | 2.0E-19                    | 2.0E-08               | rs504023       | 9.4E-27                    | 2.4E-01               | 0.05  | 0.35                           | 1.6E-04                       |
| 9q21       | rs10819937   | NM_019051   | <i>MRPL50</i>   | ↓         | 2.5E-06                    | 2.0E-08               | rs10819924     | 1.1E-31                    | 5.0E-01               | 0.01  | 3.5E-07                        | 0.007                         |
| 9q21       | rs10819937   | NM_032342   | <i>C9orf125</i> | ↓         | 7.6E-16                    | 2.0E-08               | rs2183745      | 7.8E-32                    | 2.4E-08               | 0.39  | 0.20                           | 0.16                          |
| 10q21      | rs7923609    | NM_004241   | <i>JMJD1C</i>   | ↓         | 1.0E-08                    | 5.9E-23               | rs1935         | 4.5E-09                    | 1.1E-18               | 1.00  | 0.92                           | 0.65                          |
| 10q21      | rs7923609    | NM_030759   | <i>NRBF2</i>    | ↓         | 2.4E-15                    | 5.9E-23               | rs10822163     | 1.7E-15                    | 3.4E-22               | 0.86  | 0.79                           | 0.85                          |
| 11q12      | rs174601     | NM_014206   | <i>C11orf10</i> | ↑         | 9.3E-08                    | 1.3E-08               | rs174538       | 1.7E-12                    | 2.4E-07               | 0.76  | 0.26                           | 0.66                          |
| 16q22      | rs7186908    | NM_001361   | <i>DHODH</i>    | ↑         | 3.2E-06                    | 4.8E-09               | rs3213422      | 2.3E-20                    | 6.9E-05               | 0.16  | 0.07                           | 0.07                          |
| 16q22      | rs7186908    | NM_005143   | <i>HP</i>       | ↓         | 8.4E-10                    | 4.8E-09               | rs7197453      | 2.4E-14                    | 1.8E-06               | 0.39  | 0.94                           | 0.23                          |
| 16q22      | rs7186908    | NM_020995   | <i>HPR</i>      | ↓         | 5.9E-07                    | 4.8E-09               | rs7184169      | 7.2E-08                    | 3.1E-07               | 0.75  | 0.88                           | 0.33                          |
| 17p13      | rs314253     | NM_015362   | <i>C17orf81</i> | ↑         | 1.3E-06                    | 8.4E-12               | rs222851       | 9.7E-26                    | 2.3E-06               | 0.10  | 5.1E-04                        | 0.09                          |
| 19q13      | rs281377     | NM_182575   | <i>IZUMO1</i>   | ↓         | 1.0E-08                    | 1.1E-15               | rs8104897      | 8.6E-18                    | 1.5E-09               | 0.33  | 0.12                           | 0.26                          |
| <b>GGT</b> |              |             |                 |           |                            |                       |                |                            |                       |       |                                |                               |
| 1p36.13    | rs1497406    | NM_030907   | <i>C1orf89</i>  | ↓         | 2.6E-26                    | 3.3E-19               | rs1008529      | 2.8E-42                    | 3.1E-11               | 0.44  | 0.004                          | 0.34                          |
| 1p13       | rs1335645    | NM_178454   | <i>TMEM77</i>   | ↑         | 7.2E-06                    | 7.9E-09               | rs3795823      | 6.0E-88                    | 7.7E-03               | 0.06  | 8.6E-10                        | 0.004                         |
| 1q21       | rs10908458   | NM_182685   | <i>EFNA1</i>    | ↑         | 9.0E-07                    | 1.9E-15               | rs4276913      | 2.7E-08                    | 3.3E-12               | 0.84  | 0.57                           | 0.68                          |
| 2p23       | rs1260326    | AL117421    | <i>IFT172</i>   | ↓         | 1.5E-50                    | 4.4E-13               | rs1260341      | 7.2E-241                   | 5.9E-07               | 0.50  | 9.0E-10                        | 0.26                          |
| 2q12       | rs13030978   | NM_003151   | <i>STAT4</i>    | ↓         | 3.1E-42                    | 1.2E-11               | rs13025919     | 3.3E-45                    | 1.4E-10               | 0.93  | 0.78                           | 0.49                          |
| 6p12       | rs9296736    | NM_138569   | <i>C6orf142</i> | ↓         | 1.9E-13                    | 2.9E-09               | rs4715439      | 4.0E-16                    | 1.8E-07               | 0.79  | 0.19                           | 0.44                          |
| 7q11       | rs17145750   | Contig39451 | <i>VPS37D</i>   | ↓         | 1.8E-05                    | 3.2E-09               | rs10479665     | 5.9E-12                    | 2.5E-01               | 0.00  | 0.002                          | 3.5E-08                       |
| 7q11       | rs17145750   | NM_032951   | <i>MLXIPL</i>   | ↓         | 5.9E-21                    | 3.2E-09               | rs11974409     | 8.6E-24                    | 5.0E-09               | 0.68  | 0.54                           | 0.34                          |
| 17q24      | rs9913711    | AK056229    | <i>FLJ37644</i> | ↓         | 5.9E-06                    | 1.0E-07               | rs9913936      | 1.5E-06                    | 3.8E-07               | 0.92  | 0.78                           | 0.85                          |
| 22q11.23   | rs2739330    | NM_000853   | <i>GSTT1</i>    | ↓         | 5.2E-84                    | 1.9E-09               | rs407257       | 2.1E-164                   | 1.5E-07               | 0.73  | 8.5E-06                        | 0.87                          |
| 22q11.23   | rs2739330    | NM_000854   | <i>GSTT2</i>    | ↑         | 3.1E-12                    | 1.9E-09               | rs368588       | 8.3E-43                    | 5.6E-01               | 0.04  | 0.0E+00                        | 0.20                          |
| 22q11.23   | rs2739330    | NM_001355   | <i>DDT DDTL</i> | ↓         | 2.1E-18                    | 1.9E-09               | rs5760147      | 2.1E-24                    | 5.5E-09               | 0.93  | 0.20                           | 0.98                          |
| 22q11.23   | rs2739330    | NM_002415   | <i>MIF</i>      | ↑         | 9.5E-06                    | 1.9E-09               | rs5751749      | 8.4E-07                    | 5.3E-01               | 0.01  | 0.02                           | 0.05                          |
| 22q11.23   | rs2739330    | NM_030807   | <i>SLC2A11</i>  | ↓         | 8.9E-11                    | 1.9E-09               | rs17004046     | 8.5E-21                    | 3.8E-02               | 0.13  | 2.2E-04                        | 0.05                          |

Abbreviations are as for Supplementary Table 11.

**Supplementary Table 14:** Relationship between sentinel SNPs in the liver marker GWA study, and expression of cis genes ( $\pm 1\text{MB}$ ) in peripheral blood leucocytes (University of Michigan)<sup>141</sup>. Results filtered at  $P < 2 \times 10^{-5}$  for association of sentinel SNP with transcript expression ( $P < 0.05$  after Bonferroni correction for 2892 SNP-transcript associations). Genes with  $r^2 > 0.5$  and  $P_{\text{hetero}} > 1.2 \times 10^{-3}$  (ie  $P < 0.05$  after correction for 42 tests) represent good candidates for mediators of the liver marker association observed and are highlighted yellow. Genes failing these parameters are highlighted grey.

| Locus      | Sentinel SNP | Transcript  | Gene            | Direction | $P_{\text{SS-expression}}$ | $P_{\text{SS-pheno}}$ | Transcript SNP | $P_{\text{TS-expression}}$ | $P_{\text{TS-pheno}}$ | $r^2$ | Expression $P_{\text{hetero}}$ | Phenotype $P_{\text{hetero}}$ |
|------------|--------------|-------------|-----------------|-----------|----------------------------|-----------------------|----------------|----------------------------|-----------------------|-------|--------------------------------|-------------------------------|
| <b>ALP</b> |              |             |                 |           |                            |                       |                |                            |                       |       |                                |                               |
| 1p36.12    | rs1976403    | 223638_at   | <i>NBPF3</i>    | ↑         | 4.8E-21                    | 1.8E-50               | rs1827293      | 1.3E-27                    | 9.9E-31               | 0.85  | 0.44                           | 0.004                         |
| 6p22       | rs1883415    | 203608_at   | <i>ALDH5A1</i>  | ↓         | 5.4E-11                    | 5.6E-26               | rs1126617      | 9.9E-12                    | 2.8E-25               | 1.00  | 0.95                           | 0.83                          |
| 6p22       | rs1883415    | 228542_at   | <i>MRS2L</i>    | ↓         | 1.6E-07                    | 5.6E-26               | rs3827640      | 1.2E-19                    | 7.9E-02               | 0.13  | 0.01                           | 1.0E-09                       |
| 10q21      | rs7923609    | 228793_at   | <i>JMJD1C</i>   | ↓         | 5.1E-09                    | 5.9E-23               | rs9804238      | 1.1E-15                    | 3.2E-09               | 0.44  | 1.0E-22                        | 0.31                          |
| 10q21      | rs7923609    | 223650_s_at | <i>NRBF2</i>    | ↑         | 1.6E-08                    | 5.9E-23               | rs10822163     | 1.7E-08                    | 3.4E-22               | 0.87  | 0.87                           | 0.85                          |
| 10q21      | rs7923609    | 235016_at   | <i>REEP3</i>    | ↑         | 4.0E-10                    | 5.9E-23               | rs2565185      | 4.3E-29                    | 1.3E-08               | 0.25  | 5.1E-36                        | 0.55                          |
| 11q12      | rs174601     | 218213_s_at | <i>C11orf10</i> | ↑         | 7.2E-10                    | 1.3E-08               | rs174538       | 1.2E-11                    | 2.4E-07               | 0.76  | 0.98                           | 0.66                          |
| 11q12      | rs174601     | 208962_s_at | <i>FADS1</i>    | ↓         | 2.4E-15                    | 1.3E-08               | rs174601       | 2.4E-15                    | 1.3E-08               | 1.00  | 1.00                           | 1.00                          |
| 11q12      | rs174601     | 202218_s_at | <i>FADS2</i>    | ↑         | 1.0E-06                    | 1.3E-08               | rs174541       | 1.0E-08                    | 1.1E-07               | 0.76  | 0.79                           | 0.59                          |
| 17p13      | rs314253     | 223286_at   | <i>C17orf81</i> | ↑         | 3.2E-06                    | 8.4E-12               | rs402514       | 3.5E-36                    | 4.5E-07               | 0.11  | 4.9E-08                        | 0.17                          |
| 20p11      | rs7267979    | 228124_at   | <i>ABHD12</i>   | ↓         | 2.1E-33                    | 7.4E-10               | rs2257991      | 1.2E-33                    | 2.0E-09               | 1.00  | 0.97                           | 0.95                          |
| 20p11      | rs7267979    | 206102_at   | <i>GINS1</i>    | ↓         | 5.5E-15                    | 7.4E-10               | rs2500406      | 7.6E-17                    | 3.0E-06               | 0.63  | 0.57                           | 0.87                          |
| 20p11      | rs7267979    | 201481_s_at | <i>PYGB</i>     | ↓         | 1.5E-07                    | 7.4E-10               | rs2500403      | 1.6E-11                    | 3.5E-03               | 0.24  | 0.05                           | 0.41                          |
| <b>GGT</b> |              |             |                 |           |                            |                       |                |                            |                       |       |                                |                               |
| 1p22       | rs12145922   | 209472_at   | <i>CCBL2</i>    | ↑         | 2.1E-21                    | 4.3E-11               | rs10801690     | 7.0E-35                    | 1.9E-07               | 0.52  | 0.03                           | 0.36                          |
| 1p13       | rs1335645    | 219375_at   | <i>CEPT1</i>    | ↓         | 1.9E-06                    | 7.9E-09               | rs817582       | 3.1E-07                    | 1.2E-05               | 0.72  | 0.75                           | 0.11                          |
| 2p23       | rs1260326    | 209429_x_at | <i>EIF2B4</i>   | ↓         | 1.6E-06                    | 4.4E-13               | rs2272417      | 7.4E-07                    | 1.5E-05               | 0.36  | 0.96                           | 0.07                          |
| 2p23       | rs1260326    | 217765_at   | <i>NRBP1</i>    | ↑         | 7.9E-06                    | 4.4E-13               | rs7586601      | 2.4E-09                    | 9.7E-06               | 0.54  | 0.32                           | 0.07                          |
| 2q12       | rs13030978   | 212364_at   | <i>MYO1B</i>    | ↓         | 2.0E-20                    | 1.2E-11               | rs13025919     | 2.2E-23                    | 1.4E-10               | 0.93  | 0.98                           | 0.49                          |
| 12q24      | rs7310409    | 219022_at   | <i>C12orf43</i> | ↓         | 4.3E-07                    | 1.1E-44               | rs1169303      | 1.3E-07                    | 1.6E-27               | 0.33  | 0.93                           | 0.01                          |
| 22q11.21   | rs1076540    | 212715_s_at | <i>MICAL3</i>   | ↑         | 5.2E-10                    | 1.1E-16               | rs9617648      | 1.9E-16                    | 6.8E-12               | 0.83  | 0.16                           | 0.39                          |
| 22q11.23   | rs2739330    | 203815_at   | <i>GSTT1</i>    | ↓         | 4.5E-25                    | 1.9E-09               | rs407257       | 1.0E-31                    | 1.5E-07               | 0.73  | 0.04                           | 0.87                          |
| 22q11.23   | rs2073398    | 207131_x_at | <i>GGT1</i>     | ↓         | 2.7E-17                    | 3.5E-109              | rs5760492      | 1.8E-17                    | 1.8E-108              | 1.00  | 0.75                           | 0.89                          |

Abbreviations are as for Supplementary Table 11.

**Supplementary Table 15:** Candidate genes identified by GRAIL<sup>142</sup> using Pubmed 2006 or 2010 datasets. P values are corrected for multiple testing.

| Region     | SNP        | Position  | Pubmed 2006          |      | Pubmed 2010            |        |
|------------|------------|-----------|----------------------|------|------------------------|--------|
|            |            |           | Candidate            | P    | Candidate              | P      |
| <b>ALT</b> |            |           |                      |      |                        |        |
| 4q22       | rs6834314  | 88432832  | <i>HSD17B13</i>      | 0.61 | <i>HSD17B13</i>        | 0.78   |
| 8q24       | rs2954021  | 126551259 | <i>TRIB1</i>         | 0.36 | <i>TRIB1</i>           | 0.28   |
| 10q24      | rs10883437 | 101785351 | <i>DNMBP</i>         | 0.11 | <i>DNMBP</i>           | 0.67   |
| 22q13      | rs738409   | 42656060  | <i>PARVB</i>         | 0.33 | <b><i>PNPLA3</i></b>   | 0.02   |
| <b>ALP</b> |            |           |                      |      |                        |        |
| 1p36.12    | rs1976403  | 21639040  | <i>NBPF3</i>         | 0.53 | <i>NBPF3</i>           | 0.17   |
| 2q24       | rs16856332 | 169548820 | <b><i>ABCB11</i></b> | 0.02 | <b><i>ABCB11</i></b>   | 0.007  |
| 6p22       | rs1883415  | 24599454  | <i>ALDH5A1</i>       | 0.87 | <i>ALDH5A1</i>         | 0.62   |
| 8p23       | rs6984305  | 9215678   | <i>PPP1R3B</i>       | 0.86 | <i>PPP1R3B</i>         | 0.78   |
| 8q24       | rs2954021  | 126551259 | <i>TRIB1</i>         | 0.36 | <i>TRIB1</i>           | 0.28   |
| 9q21       | rs10819937 | 103263054 | <i>ALDOB</i>         | 0.94 | <i>ALDOB</i>           | 0.50   |
| 9q34       | rs579459   | 135143989 | <i>ABO</i>           | 0.14 | <b><i>ABO</i></b>      | 0.002  |
| 10q21      | rs7923609  | 64803828  | <i>NRBF2</i>         | 0.82 | <i>REEP3</i>           | 0.43   |
| 11q12      | rs174601   | 61379716  | <i>FADS2</i>         | 0.93 | <i>FADS1</i>           | 0.66   |
| 11q.24     | rs2236653  | 125788995 | <i>ST3GAL4</i>       | 0.11 | <i>ST3GAL4</i>         | 0.29   |
| 16q22      | rs7186908  | 70777874  | <i>HP</i>            | 0.37 | <i>HP</i>              | 0.31   |
| 17p13      | rs314253   | 7032374   | <i>ASGR1</i>         | 0.57 | <i>ASGR1</i>           | 0.46   |
| 19q13      | rs281377   | 53898415  | <i>FUT2</i>          | 0.25 | <b><i>FGF21</i></b>    | 0.04   |
| 20p11      | rs7267979  | 25246087  | <i>MYLK2</i>         | 0.86 | <i>MYLK2</i>           | 0.58   |
| <b>GGT</b> |            |           |                      |      |                        |        |
| 1p36.13    | rs1497406  | 16377907  | <i>EPHA2</i>         | 0.46 | <i>EPHA2</i>           | 0.52   |
| 1p22       | rs12145922 | 88918822  | <i>PKN2</i>          | 0.99 | <i>PKN2</i>            | 0.97   |
| 1p13       | rs1335645  | 111485799 | <i>TMEM77</i>        | 1.00 | <i>DENND2D</i>         | 0.91   |
| 1q21       | rs10908458 | 153393572 | <i>PKLR</i>          | 0.80 | <i>PKLR</i>            | 0.57   |
| 2p23       | rs1260326  | 27584444  | <i>GCKR</i>          | 0.16 | <b><i>GCKR</i></b>     | 0.01   |
| 2q12       | rs13030978 | 191825483 | <i>MYO1B</i>         | 0.53 | <i>MYO1B</i>           | 0.53   |
| 2q37       | rs2140773  | 233221419 | <i>EFHD1</i>         | 0.88 | <i>EFHD1</i>           | 0.98   |
| 3q26       | rs10513686 | 172208236 | <i>SLC2A2</i>        | 0.28 | <i>SLC2A2</i>          | 0.10   |
| 4q31       | rs4547811  | 147014071 | <i>ZNF827</i>        | 0.53 | <i>ZNF827</i>          | 0.94   |
| 5p15       | rs6888304  | 31056278  | <i>CDH6</i>          | 0.76 | <i>CDH6</i>            | 0.49   |
| 5q11       | rs4074793  | 52228882  | <i>ITGA1</i>         | 0.58 | <i>ITGA1</i>           | 0.53   |
| 6p12       | rs9296736  | 54032656  | <i>C6orf142</i>      | 0.59 | <i>C6orf142</i>        | 0.84   |
| 7q11       | rs17145750 | 72664314  | <i>MLXIPL</i>        | 0.08 | <b><i>MLXIPL</i></b>   | 0.0004 |
| 10q23      | rs754466   | 79350440  | <i>DLG5</i>          | 0.79 | <i>DLG5</i>            | 0.09   |
| 12q24      | rs7310409  | 119909244 | <i>HNF1A</i>         | 0.51 | <i>HNF1A</i>           | 0.35   |
| 14q32      | rs944002   | 102642568 | <i>CDC42BPB</i>      | 0.24 | <i>CDC42BPB</i>        | 0.65   |
| 15q21      | rs339969   | 58670573  | <i>RORA</i>          | 0.39 | <i>RORA</i>            | 0.25   |
| 15q23      | rs8038465  | 71765390  | <i>NPTN</i>          | 0.74 | <i>NPTN</i>            | 0.37   |
| 16q23      | rs4581712  | 79055102  | <i>CDYL2</i>         | 0.71 | <i>CDYL2</i>           | 0.83   |
| 17q24      | rs9913711  | 67609756  | <i>SOX9</i>          | 0.71 | <i>SOX9</i>            | 0.65   |
| 18q21.31   | rs12968116 | 53473500  | <b><i>ATP8B1</i></b> | 0.01 | <b><i>ATP8B1</i></b>   | 0.02   |
| 18q21.32   | rs4503880  | 54235034  | <i>ALPK2</i>         | 0.59 | <i>ALPK2</i>           | 0.98   |
| 19q13      | rs516246   | 53897984  | <i>FUT2</i>          | 0.25 | <b><i>FGF21</i></b>    | 0.04   |
| 22q11.21   | rs1076540  | 16819958  | <i>MICAL3</i>        | 0.62 | <i>MICAL3</i>          | 0.67   |
| 22q11.23   | rs2739330  | 22625286  | <i>GSTT1</i>         | 0.57 | <i>GSTT1</i>           | 0.44   |
| 22q11.23   | rs2073398  | 23329104  | <i>C22orf36</i>      | 0.80 | <b><i>C22orf36</i></b> | 0.02   |

**Supplementary Table 16.** Associations reported from GWA studies that are in proximity (+/- 1MB) to a sentinel SNP from the liver marker GWA, based on NHGRI extract September 2010.

| Region  | LFT SNP    | Position  | NHGRI SNP  | Position  | Distance (kb) | r <sup>2</sup> | Disease/Trait                          | Reference                               |
|---------|------------|-----------|------------|-----------|---------------|----------------|----------------------------------------|-----------------------------------------|
| 1p36.12 | rs1976403  | 21639040  | rs4654748  | 21658655  | 19.6          | 0.576          | Folate pathway vitamin levels          | Tanaka et al. Am J Hum Genet 2009       |
| 1p36.12 | rs1976403  | 21639040  | rs1780324  | 21694344  | 55.3          | 0.66           | Plasma levels of liver enzymes (ALP)   | Yuan et al. Am J Hum Genet 2008         |
| 1p36.12 | rs1976403  | 21639040  | rs1697421  | 21695879  | 56.8          | 0.511          | Serum phosphorus concentrations        | Kestenbaum et al. J Am Soc Nephrol 2010 |
| 1p36.12 | rs1976403  | 21639040  | rs7524102  | 22571034  | 932.0         | 0              | Bone mineral density (spine)           | Rivadeneira et al. Nat Genet 2009       |
| 1p36.12 | rs1976403  | 21639040  | rs7524102  | 22571034  | 932.0         | 0              | Bone mineral density (hip)             | Styrkarsdottir et al. N Engl J Med 2008 |
| 1p36.12 | rs1976403  | 21639040  | rs6696981  | 22575445  | 936.4         | 0.005          | Bone mineral density (spine)           | Styrkarsdottir et al. Nat Genet 2008    |
| 1p13    | rs1335645  | 111485799 | rs494453   | 111993645 | 507.8         | 0              | Osteoporosis                           | Hsu et al. PLoS Genet 2010              |
| 1q21    | rs10908458 | 153393572 | rs4537545  | 152685503 | 708.1         | 0.01           | C-reactive protein                     | Elliott et al. JAMA 2009                |
| 1q21    | rs10908458 | 153393572 | rs4129267  | 152692888 | 700.7         | 0.007          | Protein quantitative trait loci        | Melzer et al. PLoS Genet 2008           |
| 1q21    | rs10908458 | 153393572 | rs13376333 | 153080977 | 312.6         | 0              | Atrial fibrillation                    | Ellinor et al. Nat Genet 2010           |
| 2p23    | rs1260326  | 27584444  | rs1260326  | 27584444  | 0.0           | 1              | Triglycerides                          | Kathiresan et al. Nat Genetics 2008     |
| 2p23    | rs1260326  | 27584444  | rs1260326  | 27584444  | 0.0           | 1              | Two hour glucose challenge             | Saxena et al. Nat Genetics 2010         |
| 2p23    | rs1260326  | 27584444  | rs1260326  | 27584444  | 0.0           | 1              | Other metabolic traits (Triglycerides) | Sabatti et al. Nat Genetics 2008        |
| 2p23    | rs1260326  | 27584444  | rs1260326  | 27584444  | 0.0           | 1              | Waist circumference                    | Chambers et al. Nat Genetics 2008       |
| 2p23    | rs1260326  | 27584444  | rs1260326  | 27584444  | 0.0           | 1              | Chronic kidney disease                 | Kottgen et al. Nat Genet 2010           |
| 2p23    | rs1260326  | 27584444  | rs780094   | 27594741  | 10.3          | 0.932          | Fasting insulin                        | Dupuis et al. Nat Genet 2010            |
| 2p23    | rs1260326  | 27584444  | rs780094   | 27594741  | 10.3          | 0.932          | Fasting plasma glucose                 | Dupuis et al. Nat Genet 2010            |
| 2p23    | rs1260326  | 27584444  | rs780094   | 27594741  | 10.3          | 0.932          | HOMA IR                                | Dupuis et al. Nat Genet 2010            |
| 2p23    | rs1260326  | 27584444  | rs780094   | 27594741  | 10.3          | 0.932          | Serum uric acid                        | Kolz et al. PLoS Genet 2009             |
| 2p23    | rs1260326  | 27584444  | rs780094   | 27594741  | 10.3          | 0.932          | Triglycerides                          | Aulchenko et al. Nat Genet 2009         |
| 2p23    | rs1260326  | 27584444  | rs780094   | 27594741  | 10.3          | 0.932          | C-reactive protein                     | Ridker et al. Am J Hum Genet 2008       |
| 2q24    | rs16856332 | 169548820 | rs1402837  | 169465600 | 83.2          | 0              | Glycated hemoglobin levels             | Pare et al. PLoS Genet 2008             |
| 2q24    | rs16856332 | 169548820 | rs560887   | 169471394 | 77.4          | 0              | HOMA B                                 | Dupuis et al. Nat Genet 2010            |
| 2q24    | rs16856332 | 169548820 | rs560887   | 169471394 | 77.4          | 0              | Fasting plasma glucose                 | Dupuis et al. Nat Genet 2010            |
| 2q24    | rs16856332 | 169548820 | rs2544390  | 169913092 | 364.3         | 0.019          | Hematological and biochemical traits   | Kamatani et al. Nat Genet 2010          |
| 2q12    | rs13030978 | 191825483 | rs3821236  | 191611003 | 214.5         | 0              | Systemic sclerosis                     | Radstake et al. Nat Genet 2010          |
| 2q12    | rs13030978 | 191825483 | rs7574865  | 191672878 | 152.6         | 0.009          | Systemic lupus erythematosus           | Han et al. Nat Genet 2009               |
| 2q37    | rs2140773  | 233221419 | rs7571816  | 232785308 | 436.1         | 0.004          | Height                                 | Okada et al. Hum Mol Genet 2010         |
| 2q37    | rs2140773  | 233221419 | rs6717918  | 232863354 | 358.1         | 0.002          | Height                                 | Estrada et al. Hum Mol Genet 2009       |
| 2q37    | rs2140773  | 233221419 | rs10210302 | 233823578 | 602.2         | 0.033          | Crohn's disease                        | WTCCC et al. Nature 2007                |
| 2q37    | rs2140773  | 233221419 | rs3828309  | 233845149 | 623.7         | 0.045          | Crohn's disease                        | Barrett et al. Nat Genet 2008           |
| 2q37    | rs2140773  | 233221419 | rs2241880  | 233848107 | 626.7         | 0.031          | Crohn's disease                        | Rioux et al. Nat Genet 2007             |
| 3q26    | rs10513686 | 172208236 | rs11920090 | 172200215 | 8.0           | 1              | Fasting glucose-related traits         | Dupuis et al. Nat Genet 2010            |
| 4q22    | rs6834314  | 88432832  | rs1471403  | 88994267  | 561.4         | 0.006          | Bone mineral density (spine)           | Rivadeneira et al. Nat Genet 2009       |
| 4q22    | rs6834314  | 88432832  | rs2231142  | 89271347  | 838.5         | 0.001          | Serum uric acid                        | Kolz et al. PLoS Genet 2009             |
| 7q11    | rs17145750 | 72664314  | rs13238203 | 71767603  | 896.7         | 0              | Triglycerides                          | Kathiresan et al. Nature 2010           |
| 7q11    | rs17145750 | 72664314  | rs2240466  | 72494205  | 170.1         | 0.813          | Triglycerides                          | Aulchenko et al. Nat Genet 2008         |

| Region | LFT SNP    | Position  | NHGRI SNP  | Position  | Distance (kb) | r <sup>2</sup> | Disease/Trait                          | Reference                                           |
|--------|------------|-----------|------------|-----------|---------------|----------------|----------------------------------------|-----------------------------------------------------|
| 7q11   | rs17145750 | 72664314  | rs714052   | 72502805  | 161.5         | 0.856          | Triglycerides                          | Kathiresan et al. Nat Genet 2008                    |
| 7q11   | rs17145750 | 72664314  | rs17145738 | 72620810  | 43.5          | 0.855          | Triglycerides                          | Willer et al. Nat Genet 2008                        |
| 7q11   | rs17145750 | 72664314  | rs3812316  | 72658273  | 6.0           | NA             | Triglycerides                          | Kooner et al. Nat Genet 2008                        |
| 8p23   | rs6984305  | 9215678   | rs9987289  | 9220768   | 5.1           | 0.667          | HDL                                    | Kathiresan et al. Nature 2010                       |
| 8q24   | rs2954021  | 126551259 | rs17321515 | 126555591 | 4.3           | 0.776          | Triglycerides                          | Willer et al. Nat Genetics 2008                     |
| 8q24   | rs2954021  | 126551259 | rs2954029  | 126560154 | 8.9           | 0.813          | Triglycerides                          | Kathiresan et al. Nat Genet 2008                    |
| 8q24   | rs2954021  | 126551259 | rs6987702  | 126573908 | 22.6          | 0.032          | Total Cholesterol                      | Aulchenko et al. Nat Genet 2008                     |
| 8q24   | rs2954021  | 126551259 | rs1551398  | 126609233 | 58.0          | 0.082          | Crohn's disease                        | Barrett et al. Nat Genet 2008                       |
| 9q34   | rs579459   | 135143989 | rs8176746  | 135121143 | 22.8          | 0.025          | Hematological and biochemical traits   | Kamatani et al. Nat Genet 2010                      |
| 9q34   | rs579459   | 135143989 | rs657152   | 135129086 | 14.9          | 0.461          | Plasma levels of liver enzymes (ALP)   | Yuan et al. Am J Hum Genet 2008                     |
| 9q34   | rs579459   | 135143989 | rs657152   | 135129086 | 14.9          | 0.461          | Serum Phytosterol Levels               | Teupser et al. Circ Cardiovasc Genet 2010           |
| 9q34   | rs579459   | 135143989 | rs505922   | 135139050 | 4.9           | 0.379          | Venous thromboembolism                 | Tregouet et al. Blood 2009                          |
| 9q34   | rs579459   | 135143989 | rs505922   | 135139050 | 4.9           | 0.379          | Protein quantitative trait loci (TNFA) | Melzer et al. PLoS Genet 2008                       |
| 9q34   | rs579459   | 135143989 | rs505922   | 135139050 | 4.9           | 0.379          | Pancreatic cancer                      | Amundadottir et al. Nat Genet 2009                  |
| 9q34   | rs579459   | 135143989 | rs507666   | 135139220 | 4.8           | NA             | Soluble ICAM-1                         | Pare et al. PLoS Genet 2008                         |
| 9q34   | rs579459   | 135143989 | rs651007   | 135143696 | 0.3           | 0.949          | Plasma E-selectin levels               | Qi et al. Hum Mol Genet 2010                        |
| 9q34   | rs579459   | 135143989 | rs579459   | 135143989 | 0.0           | 1              | Serum soluble E-selectin               | Paterson et al. Arterioscler Thromb Vasc Biol 2009  |
| 9q34   | rs579459   | 135143989 | rs579459   | 135143989 | 0.0           | 1              | Soluble levels of adhesion molecules   | Barbalic et al. Hum Mol Genet 2010                  |
| 9q34   | rs579459   | 135143989 | rs649129   | 135144125 | 0.1           | 1              | Soluble levels of adhesion molecules   | Barbalic et al. Hum Mol Genet 2010                  |
| 9q34   | rs579459   | 135143989 | rs495828   | 135144688 | 0.7           | 1              | Angiotensin-converting enzyme activity | Chung et al. Pharmacogenomics 2010                  |
| 9q34   | rs579459   | 135143989 | rs4962153  | 135313575 | 169.6         | 0.198          | Plasma levels of liver enzymes (ALP)   | Yuan et al. Am J Hum Genet 2008                     |
| 9q34   | rs579459   | 135143989 | rs3025343  | 135468176 | 324.2         | 0              | Smoking behavior                       | The Tobacco and Genetics Consortium. Nat Genet 2010 |
| 10q21  | rs7923609  | 64803828  | rs10995190 | 63948688  | 855.1         | 0              | Breast cancer                          | Turnbull et al. Nat Genet 2010                      |
| 10q21  | rs7923609  | 64803828  | rs10995271 | 64108492  | 695.3         | 0.001          | Crohn's disease                        | Barrett et al. Nat Genet 2008                       |
| 10q21  | rs7923609  | 64803828  | rs224136   | 64140681  | 663.1         | 0.001          | Crohn's disease                        | Rioux et al. Nat Genet 2007                         |
| 10q21  | rs7923609  | 64803828  | rs10761731 | 64697616  | 106.2         | 0.836          | Triglycerides                          | Kathiresan et al. Nature 2010                       |
| 10q21  | rs7923609  | 64803828  | rs12355784 | 64791571  | 12.3          | 0.967          | Plasma levels of liver enzymes (ALP)   | Yuan et al. Am J Hum Genet 2008                     |
| 10q21  | rs7923609  | 64803828  | rs2393967  | 64803162  | 0.7           | 0.6            | Mean platelet volume                   | Soranzo et al. Nat Genet 2009                       |
| 10q21  | rs7923609  | 64803828  | rs2893923  | 64931190  | 127.4         | 0.547          | Platelet aggregation                   | Johnson et al. Nat Genet 2010                       |
| 10q21  | rs7923609  | 64803828  | rs10761779 | 64944933  | 141.1         | 0.967          | Plasma levels of liver enzymes (ALP)   | Yuan et al. Am J Hum Genet 2008                     |
| 10q24  | rs10883437 | 101785351 | rs10883365 | 101277754 | 507.6         | 0.009          | Crohn's disease                        | Parkes et al. Nat Genet 2007                        |
| 10q24  | rs10883437 | 101785351 | rs11190140 | 101281583 | 503.8         | 0.009          | Ulcerative colitis                     | McGovern et al. Nat Genet 2010                      |
| 11q12  | rs174601   | 61379716  | rs174548   | 61327924  | 51.8          | 0.681          | Serum metabolites                      | Gieger et al. PLoS Genet 2008                       |
| 11q12  | rs174601   | 61379716  | rs174550   | 61328054  | 51.7          | 0.863          | Fasting plasma glucose                 | Dupuis et al. Nat Genet 2010                        |
| 11q12  | rs174601   | 61379716  | rs174550   | 61328054  | 51.7          | 0.863          | HOMA B                                 | Dupuis et al. Nat Genet 2010                        |
| 11q12  | rs174601   | 61379716  | rs174570   | 61353788  | 25.9          | 0.303          | Total cholesterol                      | Aulchenko et al. Nat Genet 2008                     |
| 11q12  | rs174601   | 61379716  | rs174570   | 61353788  | 25.9          | 0.303          | LDL cholesterol                        | Aulchenko et al. Nat Genet 2008                     |
| 11q12  | rs174601   | 61379716  | rs1000778  | 61411881  | 32.2          | 0.245          | Sphingolipid Concentrations            | Hicks et al. PLoS Genet 2009                        |
| 12q24  | rs7310409  | 119909244 | rs2014355  | 119659907 | 249.3         | 0.004          | Serum metabolites                      | Illig et al. Nat Genet 2009                         |

| Region | LFT SNP    | Position  | NHGRI SNP  | Position  | Distance (kb) | r <sup>2</sup> | Disease/Trait                               | Reference                           |
|--------|------------|-----------|------------|-----------|---------------|----------------|---------------------------------------------|-------------------------------------|
| 10q24  | rs10883437 | 101785351 | rs11190140 | 101281583 | 503.8         | 0.009          | Crohn's disease                             | Barrett et al. Nat Genet 2008       |
| 11q12  | rs174601   | 61379716  | rs17824933 | 60517188  | 862.5         | 0.016          | Multiple sclerosis                          | De Jager et al. Nat Genet 2009      |
| 11q12  | rs174601   | 61379716  | rs174546   | 61326406  | 53.3          | 0.863          | Triglycerides                               | Kathiresan et al. Nature 2010       |
| 11q12  | rs174601   | 61379716  | rs3136441  | 61326406  | 53.3          | 0              | Blood lipid traits                          | Teslovich et al. Nature 2010        |
| 11q12  | rs174601   | 61379716  | rs174547   | 61327359  | 52.4          | 0.863          | Serum metabolites                           | Illig et al. Nat Genet 2009         |
| 11q12  | rs174601   | 61379716  | rs174547   | 61327359  | 52.4          | 0.863          | HDL cholesterol                             | Kathiresan et al. Nat Genet 2008    |
| 12q24  | rs7310409  | 119909244 | rs2650000  | 119873345 | 35.9          | 0.604          | LDL cholesterol                             | Kathiresan et al. Nat Genet 2008    |
| 12q24  | rs7310409  | 119909244 | rs2650000  | 119873345 | 35.9          | 0.604          | Other metabolic traits (C-reactive protein) | Sabatti et al. Nat Genet 2008       |
| 12q24  | rs7310409  | 119909244 | rs1169288  | 119901033 | 8.2           | 0.617          | Total cholesterol                           | Kathiresan et al. Nature 2010       |
| 12q24  | rs7310409  | 119909244 | rs7310409  | 119909244 | 0.0           | 1              | C-reactive protein                          | Ridker et al. Am J Hum Genet 2008   |
| 12q24  | rs7310409  | 119909244 | rs1169310  | 119923816 | 14.6          | 0.719          | C-reactive protein                          | Reiner et al. Am J Hum Genet 2008   |
| 12q24  | rs7310409  | 119909244 | rs1169313  | 119927053 | 17.8          | 0.719          | Plasma levels of liver enzymes (GGT)        | Yuan et al. Am J Hum Genet 2008     |
| 12q24  | rs7310409  | 119909244 | rs7957197  | 119945069 | 35.8          | 0.114          | Type 2 diabetes                             | Voight et al. Nat Genet 2010        |
| 12q24  | rs7310409  | 119909244 | rs7961894  | 120849966 | 940.7         | 0.007          | Mean platelet volume                        | Soranzo et al. Nat Genet 2009       |
| 15q21  | rs339969   | 58670573  | rs2412710  | 59551119  | 880.5         | 0.003          | Blood lipid traits                          | Teslovich et al. Nature 2010        |
| 15q23  | rs8038465  | 71765390  | rs3825942  | 72006635  | 241.2         | 0.129          | Glaucoma (exfoliation)                      | Thorleifsson et al. Science 2007    |
| 16q22  | rs7186908  | 70777874  | rs2000999  | 70665594  | 112.3         | 0.02           | Total cholesterol                           | Kathiresan et al. Nature 2010       |
| 16q22  | rs7186908  | 70777874  | rs7193343  | 71586661  | 808.8         | 0.014          | Atrial fibrillation                         | Gudbjartsson et al. Nat Genet 2009  |
| 16q22  | rs7186908  | 70777874  | rs2106261  | 71609121  | 831.2         | 0.008          | Atrial fibrillation                         | Benjamin et al. Nat Genet 2009      |
| 16q23  | rs4581712  | 79055102  | rs1424233  | 78240252  | 814.9         | 0.06           | Obesity                                     | Meyre et al. Nat Genet 2009         |
| 16q23  | rs4581712  | 79055102  | rs6564851  | 79822098  | 767.0         | 0.005          | Plasma carotenoid and tocopherol levels     | Ferrucci et al. Am J Hum Genet 2009 |
| 17q24  | rs9913711  | 67609756  | rs1859962  | 66620348  | 989.4         | 0.003          | Prostate cancer                             | Gudmundsson et al. Nat Genet 2008   |
| 19q13  | rs281377   | 53898415  | rs492602   | 53898229  | 0.186         | 0.788          | Plasma level of vitamin B12                 | Hazra et al. Nat Genet 2008         |
| 19q13  | rs281377   | 53898415  | rs492602   | 53898229  | 0.186         | 0.788          | Total Cholesterol                           | Teslovich et al. Nature 2010        |
| 19q13  | rs281377   | 53898415  | rs602662   | 53898797  | 0.382         | 0.591          | Folate pathway vitamin levels               | Tanaka et al. Am J Hum Genet 2009   |
| 19q13  | rs281377   | 53898415  | rs504963   | 53900677  | 2.262         | 0.609          | Crohn's disease                             | McGovern et al. Hum Mol Genet 2010  |
| 19q13  | rs281377   | 53898415  | rs2280401  | 54691821  | 793.406       | 0              | Hematological and biochemical traits        | Kamatani et al. Nat Genet 2010      |
| 22q13  | rs738409   | 42656060  | rs5759167  | 41830156  | 825.9         | 0.01           | Prostate cancer                             | Eeles et al. Nat Genet 2009         |



**Supplementary Table 17.** Association of the sentinel SNPs from the 42 liver marker loci with other clinical phenotypes in published genome-wide association studies. Results are as  $-\log_{10}(P \text{ value})$  in the GWA study, signed according to the direction of change associated with the liver GWA effect allele. Associations reaching  $P < 0.0012$  (corresponding to  $P < 0.05$  after Bonferroni correction) are highlighted. P values are for the number of loci observed to be associated with each phenotype, compared to that expected under the null hypothesis. Phenotype abbreviations used and study references are described below.

| Region     | SNP        | Alcohol intake | BMI   | Systolic BP | Diastolic BP | Total chol | LDL chol | HDL chol | Triglycerides | Glucose | Insulin | HOMA-B | HOMA-IR | CRP   | T2D   |
|------------|------------|----------------|-------|-------------|--------------|------------|----------|----------|---------------|---------|---------|--------|---------|-------|-------|
|            | N (max)    | 28188          | 32530 | 69738       | 69743        | 100184     | 95454    | 99900    | 97598         | 46186   | 38238   | 36466  | 37037   | 16015 | 22570 |
| <b>ALT</b> |            |                |       |             |              |            |          |          |               |         |         |        |         |       |       |
| 4q22       | rs6834314  | 0.84           | 0.10  | 0.57        | 1.52         | -0.59      | 0.18     | 0.77     | -2.69         | -0.12   | 0.01    | -0.33  | -0.05   | 1.25  | 0.86  |
| 8q24       | rs2954021  | -0.66          | -0.63 | 0.35        | -0.19        | 30.84      | 26.48    | -15.95   | 46.14         | -0.29   | 0.08    | 0.03   | -0.01   | 0.14  | -0.05 |
| 10q24      | rs10883437 | 0.84           | 0.23  | -0.02       | 0.12         | -1.72      | -1.17    | -2.23    | 0.27          | 0.11    | 0.13    | -0.24  | 0.12    | 0.26  | 0.24  |
| 22q13      | rs738409   | -0.33          | -1.06 | -0.19       | 0.28         | -3.85      | -2.10    | -2.36    | -0.05         | 0.73    | 0.55    | 0.07   | 0.86    | -1.04 | 1.16  |
| <b>ALP</b> |            |                |       |             |              |            |          |          |               |         |         |        |         |       |       |
| 1p36.12    | rs1976403  | 0.12           | 0.11  | 0.11        | 0.45         | -0.16      | -0.19    | 0.09     | -0.11         | -0.15   | -1.30   | -1.34  | -1.53   | -0.03 | 0.28  |
| 2q24       | rs16856332 | 1.14           | -0.09 | 0.92        | 0.39         | -0.85      | -0.20    | -0.43    | -0.23         | 0.77    | -0.38   | -1.67  | -0.40   | -0.35 | 0.00  |
| 6p22       | rs1883415  | 0.07           | -0.24 | 0.11        | 0.12         | -0.58      | -0.43    | -0.37    | -0.30         | -2.27   | -1.64   | -0.35  | -1.77   | 0.92  | 0.49  |
| 8p23       | rs6984305  | -0.59          | 0.14  | 0.34        | 0.24         | -19.23     | -12.79   | -14.89   | 0.97          | 5.98    | 3.69    | 0.19   | 3.49    | -2.93 | 0.31  |
| 8q24       | rs2954021  | -0.66          | -0.63 | 0.35        | -0.19        | 30.84      | 26.48    | -15.95   | 46.14         | -0.29   | 0.08    | 0.03   | -0.01   | 0.14  | -0.05 |
| 9q21       | rs10819937 | 0.65           | -0.36 | -0.56       | -0.66        | 0.37       | 0.32     | -0.36    | 0.79          | 0.09    | 0.37    | 0.21   | 0.59    | 0.32  | -0.03 |
| 9q34       | rs579459   | 0.14           | 0.21  | 0.72        | 2.99         | -19.31     | -21.29   | -1.04    | 1.74          | -2.34   | -0.23   | 0.97   | -0.28   | -0.88 | -0.47 |
| 10q21      | rs7923609  | -0.15          | -1.69 | -1.11       | -2.34        | 2.61       | 2.45     | 3.57     | -8.25         | -0.67   | -2.06   | -0.87  | -2.42   | -1.11 | 0.11  |
| 11q12      | rs174601   | 0.09           | 0.14  | 0.00        | 1.95         | -17.37     | -16.79   | -18.57   | 20.34         | -6.04   | 0.88    | 3.87   | 0.27    | 0.31  | -1.6  |
| 11q.24     | rs2236653  | 0.09           | -1.04 | -0.63       | -0.24        | 0.28       | 0.09     | 0.83     | -0.17         | -0.44   | -0.33   | -0.54  | -0.50   | -0.80 | 0.58  |
| 16q22      | rs7186908  | -0.06          | 0.20  | -0.21       | -0.29        | -0.75      | -0.40    | 0.97     | 0.19          | -0.78   | -0.43   | 0.11   | -0.62   | 0.65  | 0.89  |
| 17p13      | rs314253   | 0.88           | -0.24 | -0.20       | -0.09        | -4.53      | -4.62    | 0.00     | -0.83         | -0.14   | -0.24   | -0.06  | -0.06   | -0.12 | 0.50  |
| 19q13      | rs281377   | -3.02          | 0.60  | -0.24       | -0.24        | -6.64      | -3.68    | -0.09    | -3.13         | 0.02    | 0.34    | 0.42   | 0.43    | -0.69 | 0.35  |
| 20p11      | rs7267979  | -0.79          | 0.05  | 2.33        | 2.13         | -2.22      | -3.47    | 0.08     | 0.51          | 3.47    | -0.61   | -1.99  | -0.15   | 0.01  | 0.70  |
| <b>GGT</b> |            |                |       |             |              |            |          |          |               |         |         |        |         |       |       |
| 1p36.13    | rs1497406  | 0.03           | -0.32 | 1.45        | 1.73         | 2.84       | 1.60     | 0.47     | 0.97          | 0.13    | -0.10   | -0.19  | -0.07   | 0.66  | -0.02 |
| 1p22       | rs12145922 | 0.20           | -1.22 | -1.42       | -1.09        | 1.57       | 2.10     | 0.04     | 0.26          | -0.13   | -1.01   | -0.89  | -1.06   | 1.20  | -1.63 |
| 1p13       | rs1335645  | -0.52          | -0.18 | -0.22       | -0.20        | -0.14      | 0.07     | -0.41    | -0.21         | 0.66    | 0.52    | 0.11   | 0.25    | -0.23 | -0.06 |
| 1q21       | rs10908458 | 0.00           | -0.07 | 0.55        | 0.49         | -2.02      | -2.33    | 0.10     | -0.22         | -0.68   | 0.09    | 0.37   | 0.05    | 0.54  | -0.07 |
| 2p23       | rs1260326  | -1.83          | -1.01 | 0.52        | 0.12         | 22.01      | 3.20     | -1.46    | 117.56        | -12.37  | -3.92   | -0.48  | -6.04   | 4.04  | -0.34 |
| 2q12       | rs13030978 | -0.39          | 0.19  | 0.10        | 0.57         | -0.45      | -1.55    | -0.02    | 0.83          | -0.12   | -0.72   | -0.53  | -0.44   | -0.62 | 1.87  |
| 2q37       | rs2140773  | -0.09          | 0.40  | 0.46        | 0.47         | -0.32      | -0.11    | -0.04    | -1.70         | 0.47    | -0.03   | -0.17  | 0.05    | 0.31  | -0.60 |
| 3q26       | rs10513686 | 0.17           | -0.35 | 0.34        | 0.33         | 1.73       | 1.89     | -0.31    | 2.14          | -5.66   | 0.58    | 3.75   | 0.00    | 1.09  | -1.55 |

|                    |            |             |             |             |             |                             |                             |                            |                             |                            |                            |                            |                            |                            |             |
|--------------------|------------|-------------|-------------|-------------|-------------|-----------------------------|-----------------------------|----------------------------|-----------------------------|----------------------------|----------------------------|----------------------------|----------------------------|----------------------------|-------------|
| 4q31               | rs4547811  | -0.20       | -0.13       | -0.48       | -0.13       | 0.42                        | 0.36                        | -0.12                      | -0.13                       | -0.78                      | -0.11                      | 0.24                       | 0.00                       | 0.24                       | -0.32       |
| 5p15               | rs6888304  | 0.34        | -0.35       | -0.31       | -0.03       | 0.10                        | -0.29                       | 0.87                       | -0.23                       | -0.61                      | 0.87                       | 1.03                       | 0.78                       | -0.07                      | -0.21       |
| 5q11               | rs4074793  | -1.13       | 0.28        | -0.33       | -1.46       | 2.89                        | 3.35                        | 0.09                       | -0.10                       | 0.78                       | 0.16                       | 0.02                       | 0.30                       | 0.02                       | 0.06        |
| 6p12               | rs9296736  | -0.11       | 0.47        | 0.21        | -0.18       | -1.27                       | -1.30                       | -0.37                      | -0.41                       | -0.21                      | 0.05                       | 0.45                       | 0.03                       | 0.13                       | 0.01        |
| 7q11               | rs17145750 | 0.12        | 0.28        | 0.19        | 0.90        | 1.73                        | -0.13                       | -4.79                      | 57.78                       | -0.14                      | -0.61                      | -0.43                      | -0.39                      | 2.32                       | -0.42       |
| 10q23              | rs754466   | -0.15       | 0.15        | 1.28        | 0.75        | -0.35                       | -0.03                       | 0.29                       | -0.40                       | -0.44                      | -0.65                      | 0.02                       | -0.50                      | 0.05                       | -0.65       |
| 12q24              | rs7310409  | 0.34        | 0.26        | -0.02       | 0.05        | -8.90                       | -9.07                       | -1.39                      | -0.09                       | -0.07                      | 1.19                       | 1.20                       | 0.93                       | 30.29                      | -2.31       |
| 14q32              | rs944002   | -0.63       | 0.01        | -0.62       | -0.27       | 0.12                        | 0.20                        | -0.42                      | 0.11                        | 1.61                       | -0.27                      | -0.70                      | -0.10                      | -0.81                      | 0.24        |
| 15q21              | rs339969   | 0.74        | 1.41        | 0.11        | -0.07       | -1.25                       | -1.30                       | 1.05                       | 0.04                        | -0.16                      | 0.24                       | 0.12                       | 0.04                       | 1.38                       | 0.70        |
| 15q23              | rs8038465  | 0.30        | 0.39        | -0.13       | 0.02        | 0.93                        | 0.10                        | 0.19                       | 0.66                        | -0.07                      | 0.04                       | 0.12                       | 0.06                       | -0.41                      | -0.27       |
| 16q23              | rs4581712  | -0.01       | 0.38        | -0.37       | -0.07       | -0.33                       | -0.35                       | 0.02                       | 0.19                        | 0.59                       | -0.01                      | -0.03                      | 0.23                       | 0.87                       | 0.31        |
| 17q24              | rs9913711  | 0.88        | 0.04        | -0.20       | -0.30       | -0.26                       | 0.08                        | -0.21                      | -1.15                       | -0.33                      | 0.38                       | 0.02                       | 0.21                       | 0.01                       | -0.12       |
| 18q21.31           | rs12968116 | 0.54        | 0.70        | 0.17        | -0.35       | -1.67                       | -1.27                       | -0.04                      | -0.89                       | 0.17                       | 0.11                       | 0.04                       | 0.24                       | 1.34                       | 1.48        |
| 18q21.32           | rs4503880  | 0.01        | -1.16       | -1.13       | -0.52       | -0.21                       | -0.47                       | -0.04                      | -0.44                       | -0.81                      | -0.46                      | -0.27                      | -0.61                      | -1.01                      | 0.74        |
| 19q13              | rs516246   | 1.90        | -0.94       | 0.20        | 0.21        | 9.45                        | 7.32                        | -0.30                      | 5.13                        | -0.40                      | -0.36                      | -0.48                      | -0.61                      | 0.68                       | -0.59       |
| 22q11.21           | rs1076540  | -0.08       | 0.33        | -0.37       | -0.79       | -0.45                       | -0.72                       | 0.33                       | 0.64                        | 0.15                       | -0.29                      | -0.13                      | -0.17                      | 0.66                       | 0.05        |
| 22q11.23           | rs2739330  | -1.45       | 0.04        | 0.03        | -0.53       | -0.14                       | -0.63                       | 0.79                       | 1.12                        | 0.32                       | -0.43                      | -0.49                      | -0.35                      | -0.24                      | -1.56       |
| 22q11.23           | rs2073398  | -0.38       | -0.81       | -0.11       | -0.15       | -1.36                       | -0.46                       | -1.24                      | -0.46                       | 0.74                       | -0.18                      | -1.28                      | -0.40                      | -0.76                      | 1.28        |
| <b>N at</b>        |            | <b>1</b>    | <b>0</b>    | <b>0</b>    | <b>0</b>    | <b>9</b>                    | <b>10</b>                   | <b>5</b>                   | <b>6</b>                    | <b>5</b>                   | <b>2</b>                   | <b>2</b>                   | <b>2</b>                   | <b>2</b>                   | <b>0</b>    |
| <b>P&lt;0.0012</b> |            |             |             |             |             |                             |                             |                            |                             |                            |                            |                            |                            |                            |             |
| <b>P=</b>          |            | <b>0.05</b> | <b>0.95</b> | <b>0.95</b> | <b>0.95</b> | <b>&lt;10<sup>-15</sup></b> | <b>&lt;10<sup>-15</sup></b> | <b>1.9x10<sup>-9</sup></b> | <b>1.4x10<sup>-11</sup></b> | <b>1.9x10<sup>-9</sup></b> | <b>1.2x10<sup>-3</sup></b> | <b>1.2x10<sup>-3</sup></b> | <b>1.2x10<sup>-3</sup></b> | <b>1.2x10<sup>-3</sup></b> | <b>0.95</b> |

### Abbreviations / references:

Alcohol: Alcohol intake<sup>143</sup>

BMI: Body mass index<sup>144</sup>

BP: Blood pressure<sup>145</sup>

Chol: Cholesterol<sup>78</sup>

CRP: C-reactive protein<sup>80</sup>

Glucose<sup>79</sup>

Insulin<sup>79</sup>

HOMA-IR: Homeostasis model assessment of insulin resistance<sup>79</sup>

HOMA-B: Homeostasis model assessment of beta cell function<sup>79</sup>

T2D: Type-2 diabetes<sup>82</sup>

Triglycerides<sup>78</sup>

**Supplementary Table 18.** Associations with liver markers and proportion of population variance explained, amongst the 8,112 participants of the LIFELINES.<sup>14</sup> Effect: % (95%CI) change in phenotype per allele copy. Direction: concordant (+) or discordant (-) direction of effect compared with results from the GWA study. # indicates proxy SNP for the sentinel SNP in the GWA study.

| Region     | SNP                     | Genes                                | Effect (%)         | P       | Direction | r2    |
|------------|-------------------------|--------------------------------------|--------------------|---------|-----------|-------|
| <b>ALT</b> |                         |                                      |                    |         |           |       |
| 4q22       | rs6832102 <sup>#</sup>  | <i>HSD17B13, MAPK10</i>              | 1.8 (0.2 to 3.5)   | 2.8E-02 | +         | 0.000 |
| 8q24       | rs2954021               | <i>TRIB1</i>                         | 1.4 (-0.1 to 2.9)  | 7.1E-02 | +         | 0.000 |
| 10q24      | rs4919416 <sup>#</sup>  | <i>CPN1</i>                          | 1.4 (-0.6 to 3.4)  | 1.7E-01 | +         | 0.000 |
| 22q13      | rs738409                | <i>PNPLA3, SAMM50</i>                | 5.0 (2.2 to 7.8)   | 3.1E-04 | +         | 0.002 |
| <b>ALP</b> |                         |                                      |                    |         |           |       |
| 1p36.12    | rs1976403               | <i>ALPL, NBPF3</i>                   | 3.8 (2.9 to 4.6)   | 1.5E-18 | +         | 0.008 |
| 2q24       | rs16856332              | <i>ABCB11</i>                        | 0.9 (-1.4 to 3.2)  | 4.4E-01 | +         | 0.000 |
| 6p22       | rs1126617 <sup>#</sup>  | <i>ALDH5A1, GPLD1</i>                | 3.4 (2.5 to 4.3)   | 1.8E-14 | +         | 0.007 |
| 8p23       | rs6984305               | <i>PPP1R3B</i>                       | 1.9 (0.3 to 3.5)   | 1.6E-02 | +         | 0.001 |
| 8q24       | rs2954021               | <i>TRIB1</i>                         | 0.7 (-0.2 to 1.5)  | 1.3E-01 | +         | 0.000 |
| 9q21       | rs10819937              | <i>ALDOB, C9orf125</i>               | 1.3 (0.1 to 2.5)   | 3.0E-02 | +         | 0.001 |
| 9q34       | rs579459                | <i>ABO</i>                           | 7.8 (6.7 to 8.9)   | 2.7E-48 | +         | 0.024 |
| 10q21      | rs7923609               | <i>JMJD1C, NRBF2</i>                 | 2.6 (1.8 to 3.5)   | 1.6E-09 | +         | 0.004 |
| 11q12      | rs174601                | <i>C11orf10, FADS1, FADS2</i>        | 2.1 (0.7 to 3.6)   | 4.0E-03 | +         | 0.001 |
| 11q.24     | rs2236653               | <i>ST3GAL4</i>                       | 1.3 (0.1 to 2.4)   | 3.2E-02 | +         | 0.001 |
| 16q22      | rs7186908               | <i>HPR, PMFBP1</i>                   | 0.8 (-0.3 to 1.8)  | 1.4E-01 | +         | 0.000 |
| 17p13      | rs314253                | <i>ASGR1, DLG4</i>                   | 2.3 (0.9 to 3.6)   | 7.4E-04 | +         | 0.001 |
| 19q13      | rs601338 <sup>#</sup>   | <i>FUT2</i>                          | 2.7 (1.8 to 3.7)   | 1.4E-08 | +         | 0.004 |
| 20p11      | rs7267979               | <i>ABHD12, GINS1, PYGB</i>           | 1.1 (0.3 to 1.9)   | 1.0E-02 | +         | 0.001 |
| <b>GGT</b> |                         |                                      |                    |         |           |       |
| 1p36.13    | rs1497406               | <i>C1orf89, EPHA2</i>                | 3.8 (2.2 to 5.5)   | 3.7E-06 | +         | 0.003 |
| 1p22       | rs12145922              | <i>CCBL2, PKN2</i>                   | 1.5 (-0.2 to 3.2)  | 8.1E-02 | +         | 0.000 |
| 1p13       | rs1043096 <sup>#</sup>  | <i>CEPT1, DENND2D</i>                | 2.5 (-0.2 to 5.3)  | 6.5E-02 | +         | 0.000 |
| 1q21       | rs10908458              | <i>DPM3, EFNA1, PKLR</i>             | 1.8 (0.0 to 3.7)   | 5.1E-02 | +         | 0.001 |
| 2p23       | rs1260326               | <i>C2orf16, GCKR</i>                 | 1.9 (0.3 to 3.6)   | 2.3E-02 | +         | 0.001 |
| 2q12       | rs13030978              | <i>MYO1B, STAT4</i>                  | 4.3 (2.4 to 6.3)   | 6.1E-06 | +         | 0.003 |
| 2q37       | rs4973550 <sup>#</sup>  | <i>EFHD1, LOC100129166</i>           | 1.5 (-1.0 to 3.9)  | 2.4E-01 | +         | 0.000 |
| 3q26       | rs10513686              | <i>SLC2A2</i>                        | 4.1 (1.4 to 6.9)   | 2.6E-03 | +         | 0.001 |
| 4q31       | rs4547811               | <i>ZNF827</i>                        | 4.3 (2.2 to 6.4)   | 4.2E-05 | +         | 0.002 |
| 5p15       | rs6888304               | <i>CDH6</i>                          | 0.5 (-1.6 to 2.7)  | 6.5E-01 | +         | 0.000 |
| 5q11       | rs4074793               | <i>ITGA1</i>                         | 5.8 (2.7 to 9.0)   | 2.2E-04 | +         | 0.002 |
| 6p12       | rs9296736               | <i>C6orf142</i>                      | 0.4 (-1.5 to 2.5)  | 6.6E-01 | +         | 0.000 |
| 7q11       | rs13233571 <sup>#</sup> | <i>MLXIPL</i>                        | 3.9 (1.5 to 6.3)   | 1.3E-03 | +         | 0.001 |
| 10q23      | rs754466                | <i>DLG5</i>                          | 2.0 (-0.1 to 4.0)  | 6.1E-02 | +         | 0.000 |
| 12q24      | rs7310409               | <i>HNF1A, C12orf27</i>               | 5.5 (3.8 to 7.2)   | 6.0E-11 | +         | 0.004 |
| 14q32      | rs944002                | <i>C14orf73</i>                      | 7.5 (3.7 to 11.4)  | 8.5E-05 | +         | 0.001 |
| 15q21      | rs339969                | <i>RORA</i>                          | 2.2 (0.5 to 3.8)   | 9.2E-03 | +         | 0.001 |
| 15q23      | rs8038465               | <i>CD276</i>                         | 3.1 (1.5 to 4.7)   | 1.6E-04 | +         | 0.001 |
| 16q23      | rs4581712               | <i>DYNLRB2</i>                       | 0.9 (-1.0 to 2.7)  | 3.6E-01 | +         | 0.000 |
| 17q24      | rs9913711               | <i>FLJ37644, SOX9</i>                | -0.1 (-2.0 to 1.9) | 9.4E-01 | -         | 0.000 |
| 18q21.31   | rs12968116              | <i>ATP8B1</i>                        | 3.6 (0.8 to 6.5)   | 1.2E-02 | +         | 0.001 |
| 18q21.32   | rs4503880               | <i>NEDD4L</i>                        | 3.1 (-0.8 to 7.2)  | 1.2E-01 | +         | 0.000 |
| 19q13      | rs601338 <sup>#</sup>   | <i>FUT2</i>                          | 1.1 (-0.7 to 2.9)  | 2.4E-01 | +         | 0.000 |
| 22q11.21   | rs1076540               | <i>MICAL3</i>                        | 2.6 (0.6 to 4.6)   | 1.1E-02 | +         | 0.001 |
| 22q11.23   | rs2739330               | <i>DDT, DDTL, GSTT1, GSTT2B, MIF</i> | 0.4 (-1.8 to 2.6)  | 7.4E-01 | +         | 0.000 |
| 22q11.23   | rs2330795 <sup>#</sup>  | <i>GGT1, GGTL2</i>                   | 8.1 (6.2 to 10.0)  | 8.8E-18 | +         | 0.007 |

**Supplementary Table 19.** Association of SNP scores with liver markers amongst the 8,112 participants of the LIFELINES study.<sup>14</sup> Results provided as: i. proportion of population variation explained ( $r^2$ ); ii. mean (SD) level of liver marker amongst participants in each quartile of SNP score, and iii. odds ratio for raised liver marker (>upper limit of normal) associated with SNP score in quartile 2-4, compared to quartile 1 (reference) SNP score.

| Phenotype | SNP score <sup>#</sup> | $r^2$ | Mean (SD) levels of liver marker by quartile of SNP score |             |             |             | Odds ratio (95%CI) for raised liver marker by quartile of SNP score |                     |                     |
|-----------|------------------------|-------|-----------------------------------------------------------|-------------|-------------|-------------|---------------------------------------------------------------------|---------------------|---------------------|
|           |                        |       | Quartile 1                                                | Quartile 2  | Quartile 3  | Quartile 4  | Quartile 2                                                          | Quartile 3          | Quartile 4          |
| ALT       | ALT SNPs               | 0.001 | 23.1 (14.7)                                               | 23.5 (19.7) | 24.0 (14.3) | 24.7 (17.8) | 0.89 (0.69 to 1.16)                                                 | 1.10 (0.86 to 1.41) | 1.42 (1.12 to 1.79) |
| ALT       | All SNPs               | 0.001 | 23.4 (18.1)                                               | 23.5 (17.6) | 24.1 (15.3) | 24.3 (15.9) | 0.98 (0.76 to 1.26)                                                 | 1.24 (0.97 to 1.58) | 1.31 (1.03 to 1.66) |
| ALP       | ALP SNPs               | 0.035 | 59.1 (18.3)                                               | 61.8 (17.2) | 63.5 (17.9) | 66.9 (19.1) | 0.90 (0.37 to 2.23)                                                 | 1.92 (0.89 to 4.14) | 2.43 (1.16 to 5.09) |
| ALP       | All SNPs               | 0.012 | 60.4 (16.9)                                               | 62.4 (17.4) | 63.4 (19.1) | 65.1 (19.5) | 1.56 (0.68 to 3.62)                                                 | 1.89 (0.84 to 4.26) | 2.47 (1.13 to 5.38) |
| GGT       | GGT SNPs               | 0.019 | 23.6 (20.8)                                               | 25.6 (22.9) | 26.6 (23.0) | 29.5 (29.9) | 1.36 (1.04 to 1.78)                                                 | 1.39 (1.07 to 1.82) | 1.84 (1.43 to 2.37) |
| GGT       | All SNPs               | 0.011 | 24.4 (21.7)                                               | 25.0 (19.1) | 26.8 (28.5) | 29.2 (27.2) | 1.00 (0.77 to 1.31)                                                 | 1.18 (0.92 to 1.53) | 1.53 (1.20 to 1.96) |

<sup>#</sup>SNP scores determined as the sum of effect alleles for the SNPs associated with respective phenotype [ALT, ALP, GGT] at  $P < 1 \times 10^{-8}$  in the GWA study, or the sum of effect allele for SNPs at all 42 loci identified [All SNPs]. Mean values of SNP scores (quartile 1 to quartile 4 respectively) were i. ALP SNPs: 9.9, 11.9, 13.2, 15.2; ii. ALT SNPs: 2.6, 3.5, 4.2, 5.2; iii. GGT SNPs: 20.8, 23.2, 24.9, 27.3; and iv. All SNPs: 35.8, 39.3, 41.7, 45.2.

**Supplementary Table 20.** Associations with hepatic steatosis assessed by CT in 9,610 people (GOLD study).<sup>13</sup> Lower attenuation indicates greater steatosis. Effect is change in liver attenuation per copy of allele associated with raised liver markers in the GWA study (Table 1).

| Region     | SNP        | Trait                                | Effect | SE    | P       |
|------------|------------|--------------------------------------|--------|-------|---------|
| <b>ALT</b> |            |                                      |        |       |         |
| 4q22       | rs6834314  | <i>HSD17B13, MAPK10</i>              | -0.001 | 0.019 | 0.95    |
| 8q24       | rs2954021  | <i>TRIB1</i>                         | -0.044 | 0.017 | 0.01    |
| 10q24      | rs10883437 | <i>CPN1</i>                          | -0.002 | 0.018 | 0.92    |
| 22q13      | rs738409   | <i>PNPLA3, SAMM50</i>                | -0.261 | 0.021 | 4.3E-34 |
| <b>ALP</b> |            |                                      |        |       |         |
| 1p36.12    | rs1976403  | <i>ALPL, NBPF3</i>                   | 0.014  | 0.019 | 0.47    |
| 2q24       | rs16856332 | <i>ABCB11</i>                        | -0.055 | 0.051 | 0.28    |
| 6p22       | rs1883415  | <i>ALDH5A1, GPLD1</i>                | -0.008 | 0.018 | 0.68    |
| 8p23       | rs6984305  | <i>PPP1R3B</i>                       | 0.232  | 0.031 | 7.9E-14 |
| 8q24       | rs2954021  | <i>TRIB1</i>                         | -0.044 | 0.017 | 0.01    |
| 9q21       | rs10819937 | <i>ALDOB, C9orf125</i>               | 0.009  | 0.026 | 0.73    |
| 9q34       | rs579459   | <i>ABO</i>                           | 0.009  | 0.023 | 0.68    |
| 10q21      | rs7923609  | <i>JMJD1C, NRBF2</i>                 | -0.018 | 0.017 | 0.30    |
| 11q12      | rs174601   | <i>C11orf10, FADS1, FADS2</i>        | -0.006 | 0.019 | 0.75    |
| 11q.24     | rs2236653  | <i>ST3GAL4</i>                       | -0.029 | 0.018 | 0.11    |
| 16q22      | rs7186908  | <i>HPR, PMFBP1</i>                   | 0.013  | 0.021 | 0.56    |
| 17p13      | rs314253   | <i>ASGR1, DLG4</i>                   | 0.015  | 0.019 | 0.41    |
| 19q13      | rs281377   | <i>FUT2</i>                          | 0.028  | 0.021 | 0.19    |
| 20p11      | rs7267979  | <i>ABHD12, GINS1, PYGB</i>           | 0.005  | 0.018 | 0.77    |
| <b>GGT</b> |            |                                      |        |       |         |
| 1p36.13    | rs1497406  | <i>C1orf89, EPHA2</i>                | -0.001 | 0.018 | 0.95    |
| 1p22       | rs12145922 | <i>CCBL2, PKN2</i>                   | 0.026  | 0.018 | 0.14    |
| 1p13       | rs1335645  | <i>CEPT1, DENND2D</i>                | -0.044 | 0.027 | 0.11    |
| 1q21       | rs10908458 | <i>DPM3, EFNA1, PKLR</i>             | -0.007 | 0.018 | 0.71    |
| 2p23       | rs1260326  | <i>C2orf16, GCKR</i>                 | 0.064  | 0.018 | 3.6E-04 |
| 2q12       | rs13030978 | <i>MYO1B, STAT4</i>                  | 0.030  | 0.019 | 0.12    |
| 2q37       | rs2140773  | <i>EFHD1, LOC100129166</i>           | 0.003  | 0.018 | 0.86    |
| 3q26       | rs10513686 | <i>SLC2A2</i>                        | 0.007  | 0.028 | 0.81    |
| 4q31       | rs4547811  | <i>ZNF827</i>                        | 0.029  | 0.024 | 0.23    |
| 5p15       | rs6888304  | <i>CDH6</i>                          | 0.004  | 0.021 | 0.85    |
| 5q11       | rs4074793  | <i>ITGA1</i>                         | -0.055 | 0.036 | 0.12    |
| 6p12       | rs9296736  | <i>C6orf142</i>                      | 0.001  | 0.019 | 0.94    |
| 7q11       | rs17145750 | <i>MLXIPL</i>                        | 0.012  | 0.026 | 0.63    |
| 10q23      | rs754466   | <i>DLG5</i>                          | 0.034  | 0.022 | 0.12    |
| 12q24      | rs7310409  | <i>HNF1A, C12orf27</i>               | 0.049  | 0.018 | 6.3E-03 |
| 14q32      | rs944002   | <i>C14orf73</i>                      |        |       |         |
| 15q21      | rs339969   | <i>RORA</i>                          | -0.015 | 0.019 | 0.43    |
| 15q23      | rs8038465  | <i>CD276</i>                         | 0.008  | 0.018 | 0.66    |
| 16q23      | rs4581712  | <i>DYNLRB2</i>                       | -0.009 | 0.020 | 0.63    |
| 17q24      | rs9913711  | <i>FLJ37644, SOX9</i>                | 0.037  | 0.019 | 0.05    |
| 18q21.31   | rs12968116 | <i>ATP8B1</i>                        | -0.023 | 0.024 | 0.35    |
| 18q21.32   | rs4503880  | <i>NEDD4L</i>                        | -0.002 | 0.022 | 0.92    |
| 19q13      | rs516246   | <i>FUT2</i>                          | -0.021 | 0.020 | 0.30    |
| 22q11.21   | rs1076540  | <i>MICAL3</i>                        | 0.025  | 0.021 | 0.23    |
| 22q11.23   | rs2739330  | <i>DDT, DDTL, GSTT1, GSTT2B, MIF</i> | -0.005 | 0.019 | 0.78    |

**Supplementary Figure 1.** Regional plots for genetic loci associated with ALT in the genome-wide association study.

**Figure 1.1** Locus 4q22

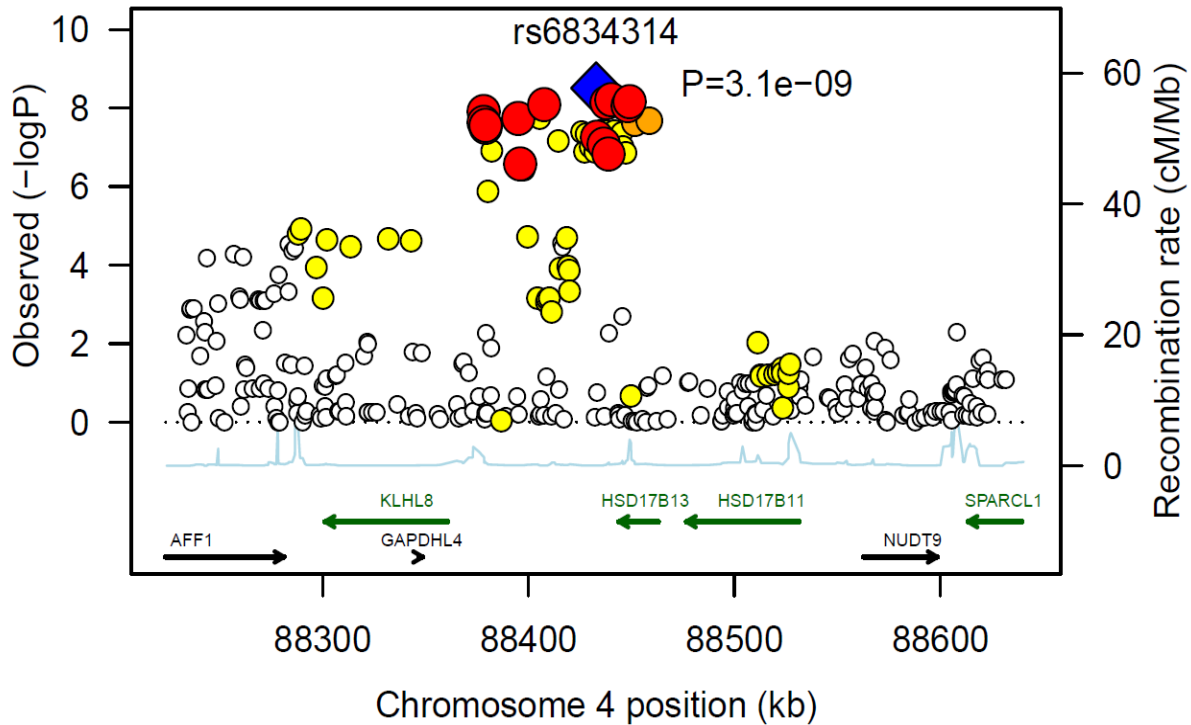

**Figure 1.2** Locus 8q24

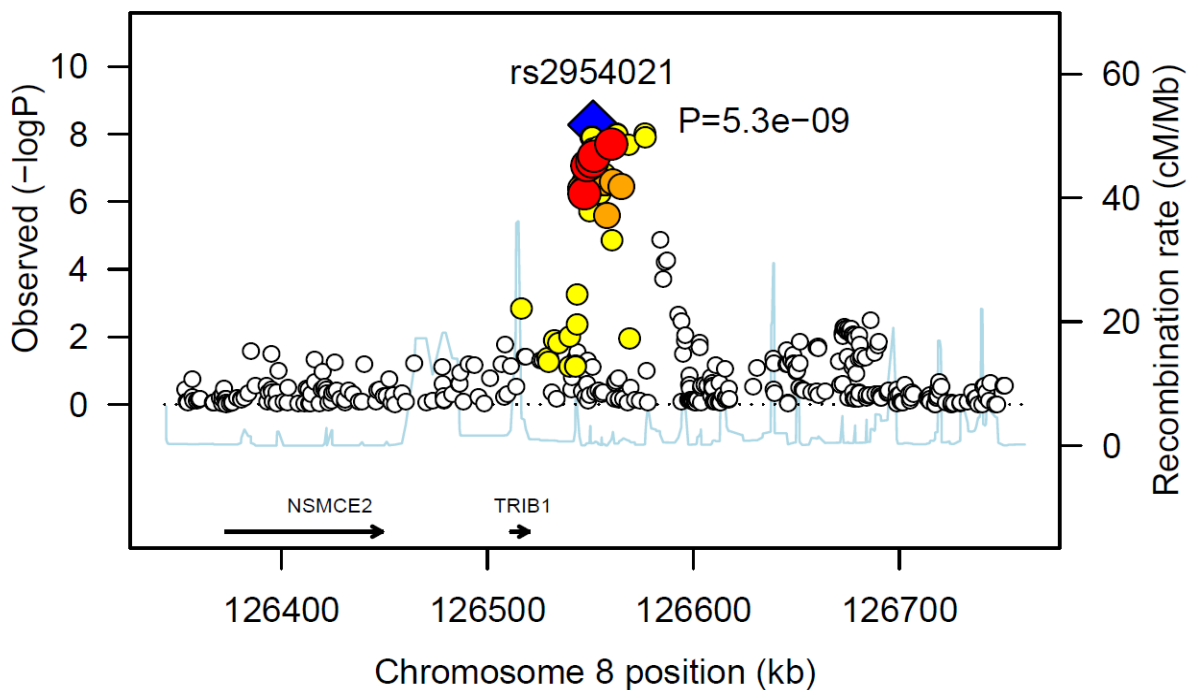

**Figure 1.3** Locus 10q24

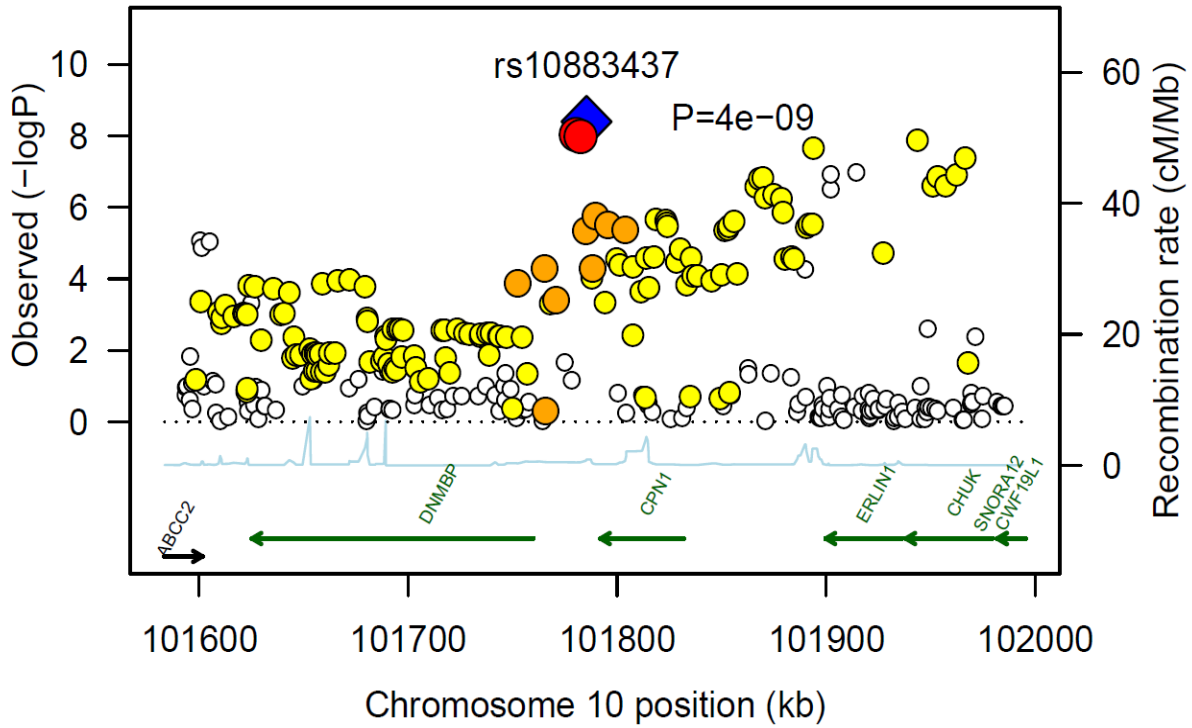

**Figure 1.4** Locus 22q13

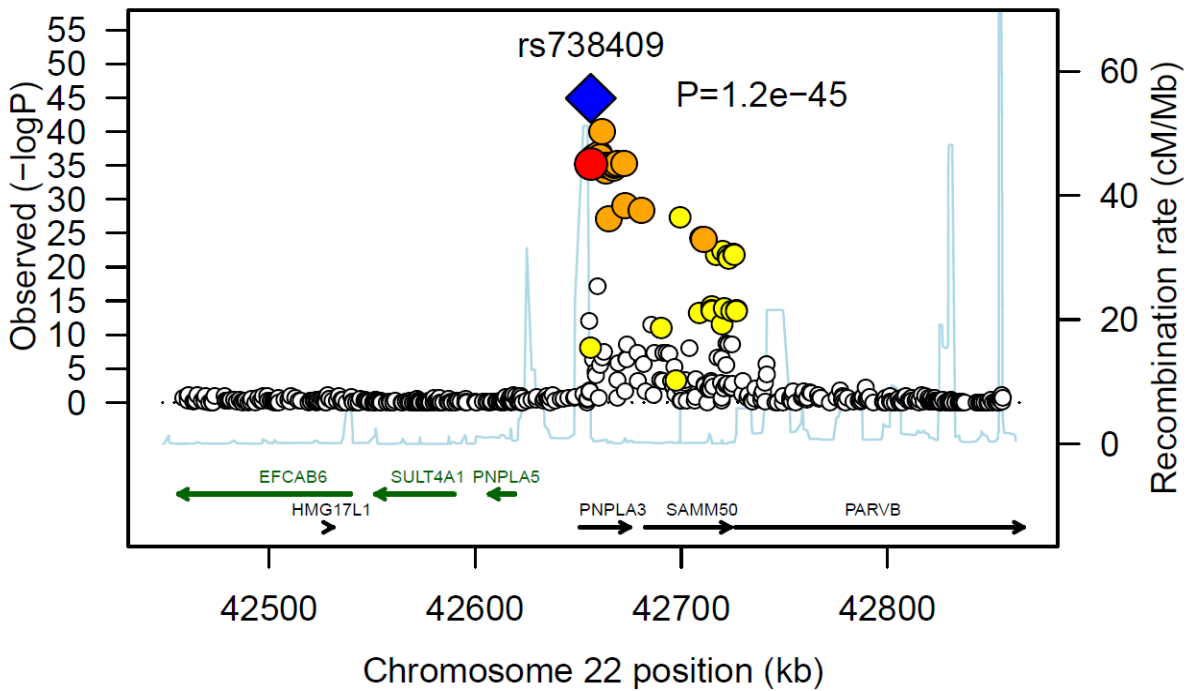

**Supplementary Figure 2.** Regional plots for genetic loci associated with ALP in the genome-wide association study.

**Figure 2.1** Locus 1p36.12

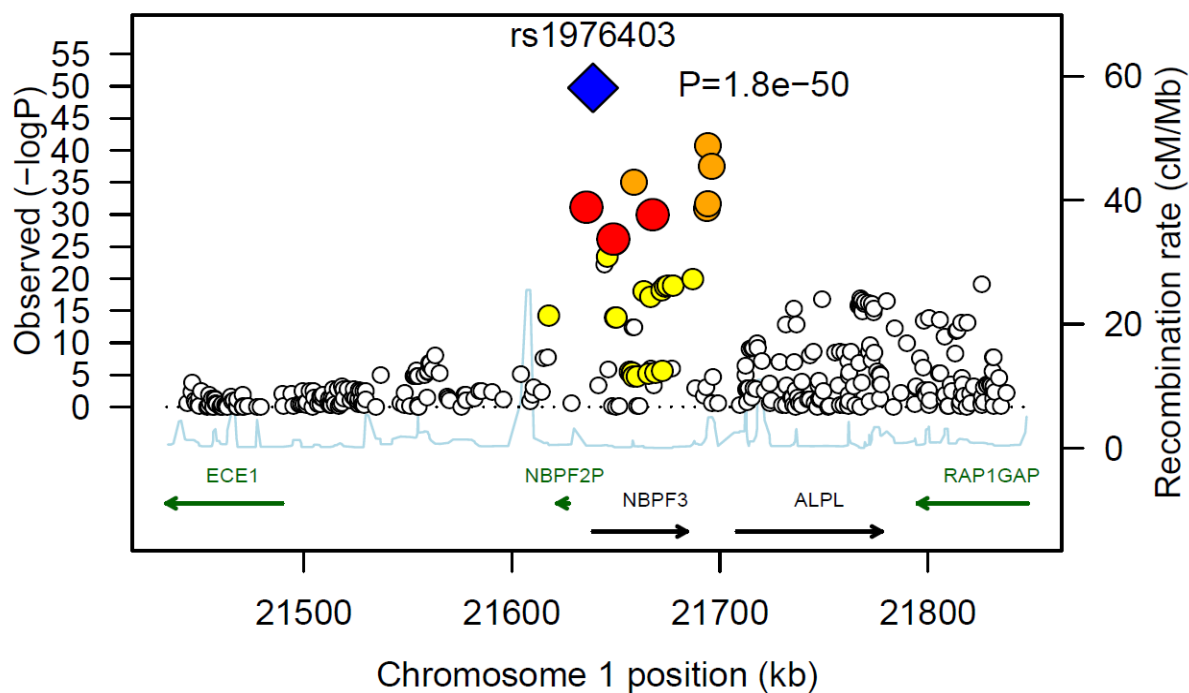

**Figure 2.2** Locus 2q24

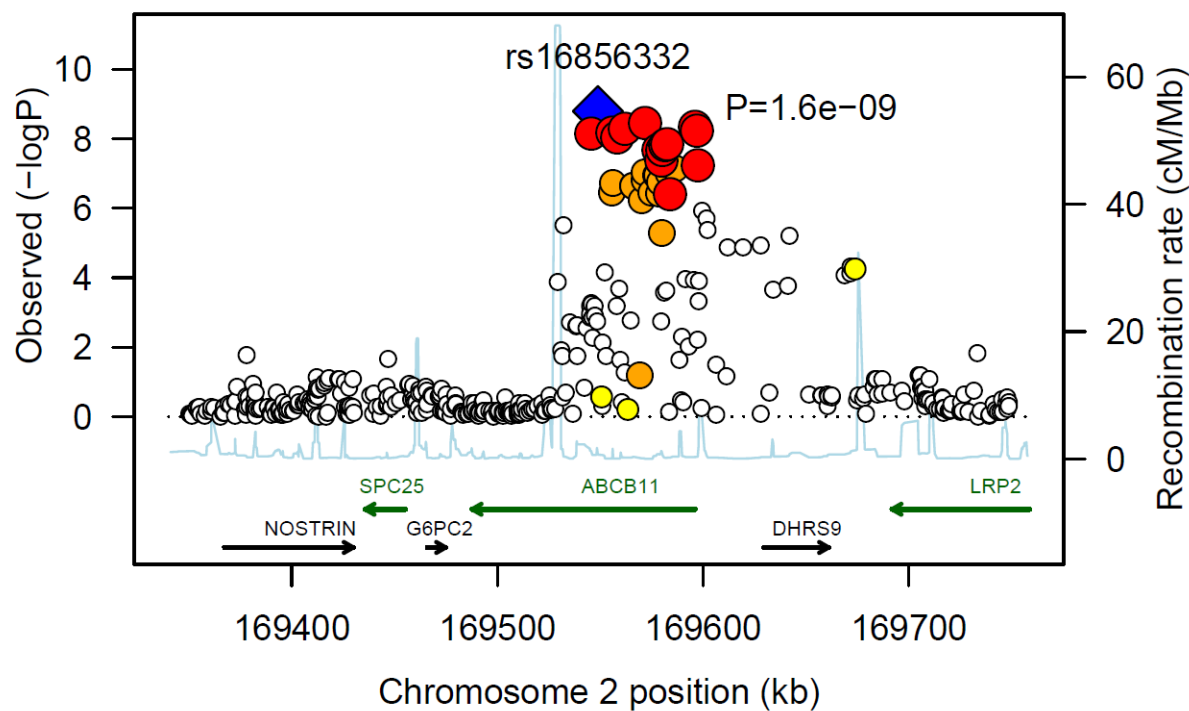



**Figure 2.3** Locus 6p22

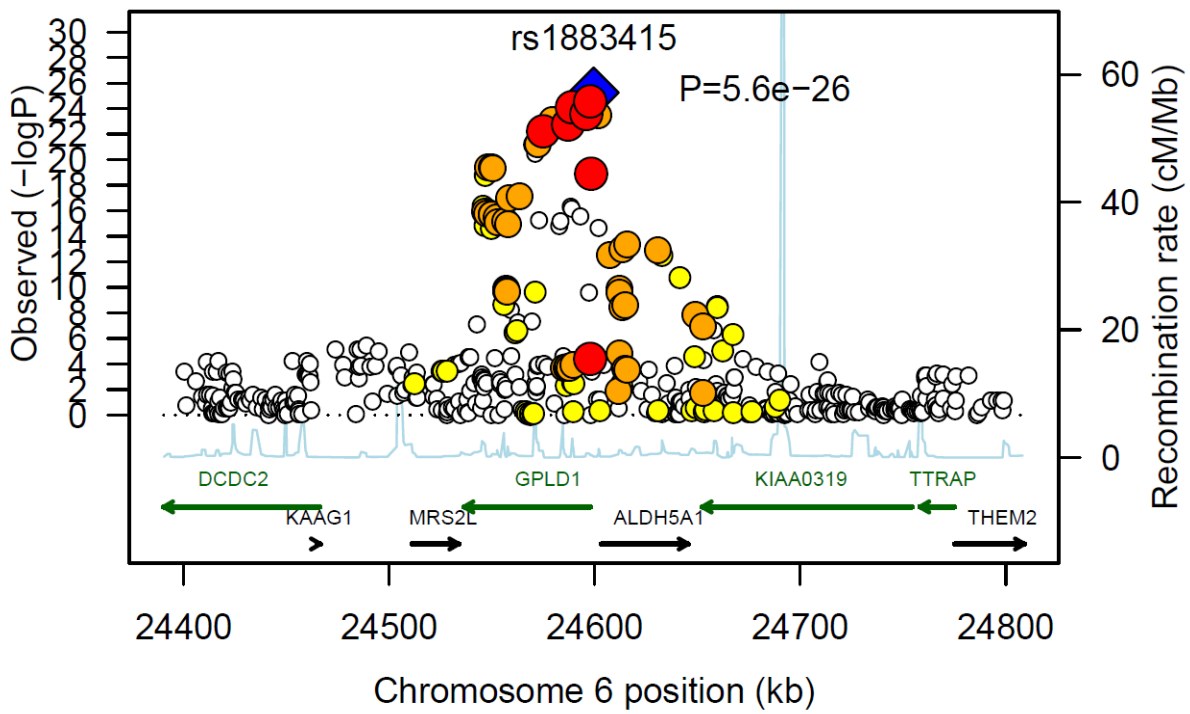

**Figure 2.4** Locus 8p23

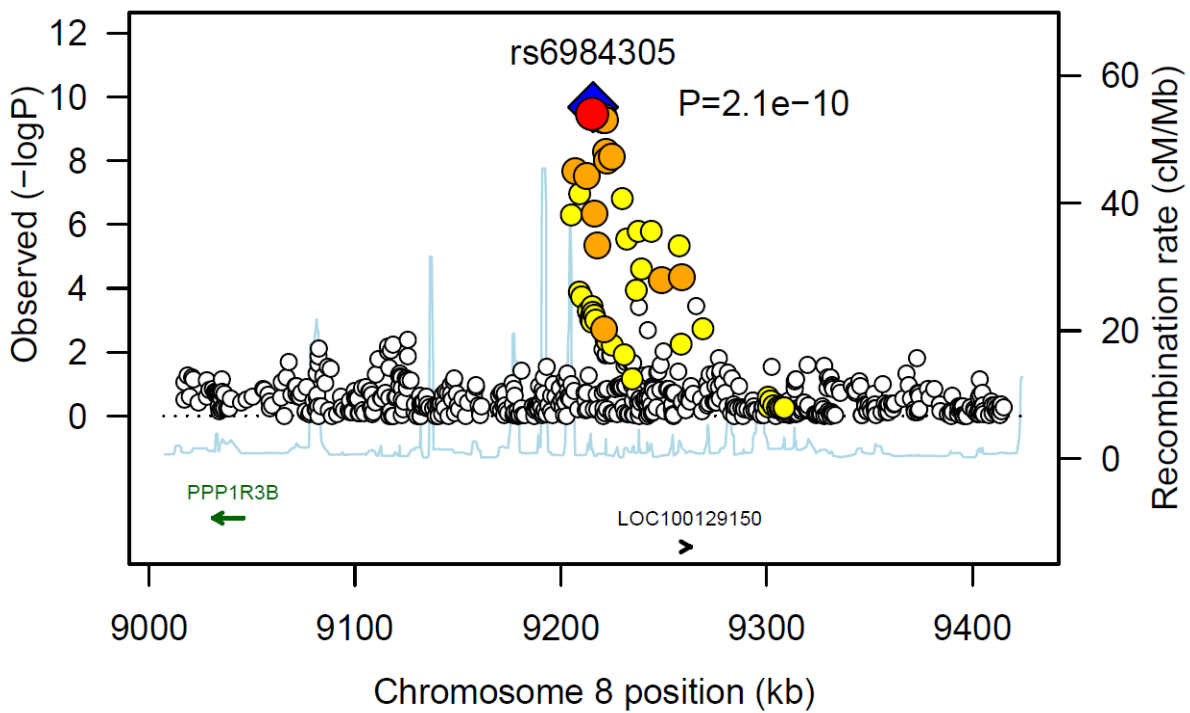

**Figure 2.5** Locus 8q24

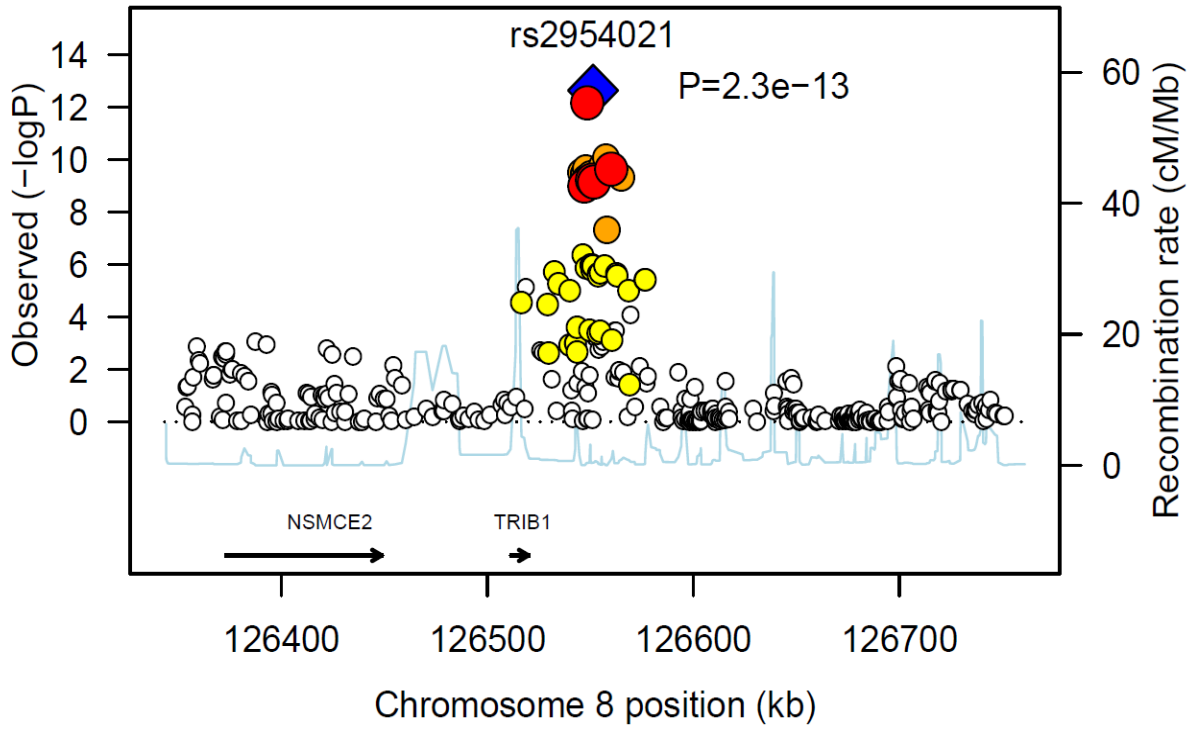

**Figure 2.6** Locus 9q21

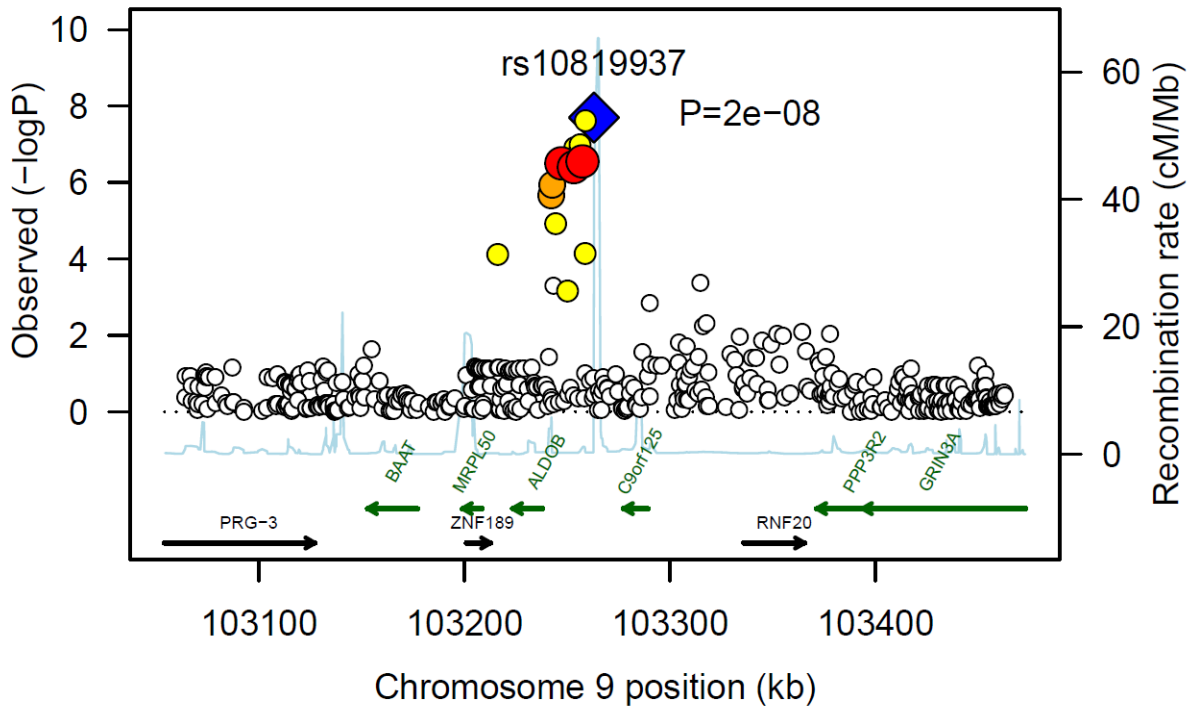

**Figure 2.7** Locus 9q34

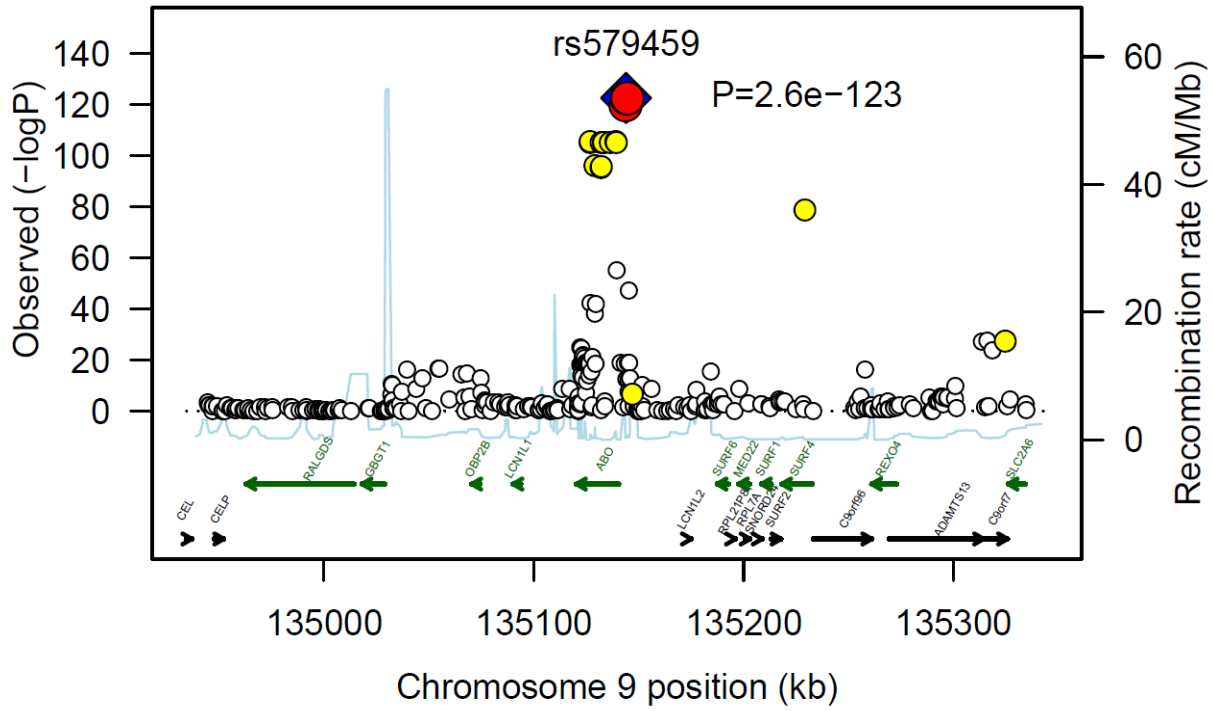

**Figure 2.8** Locus 10q21

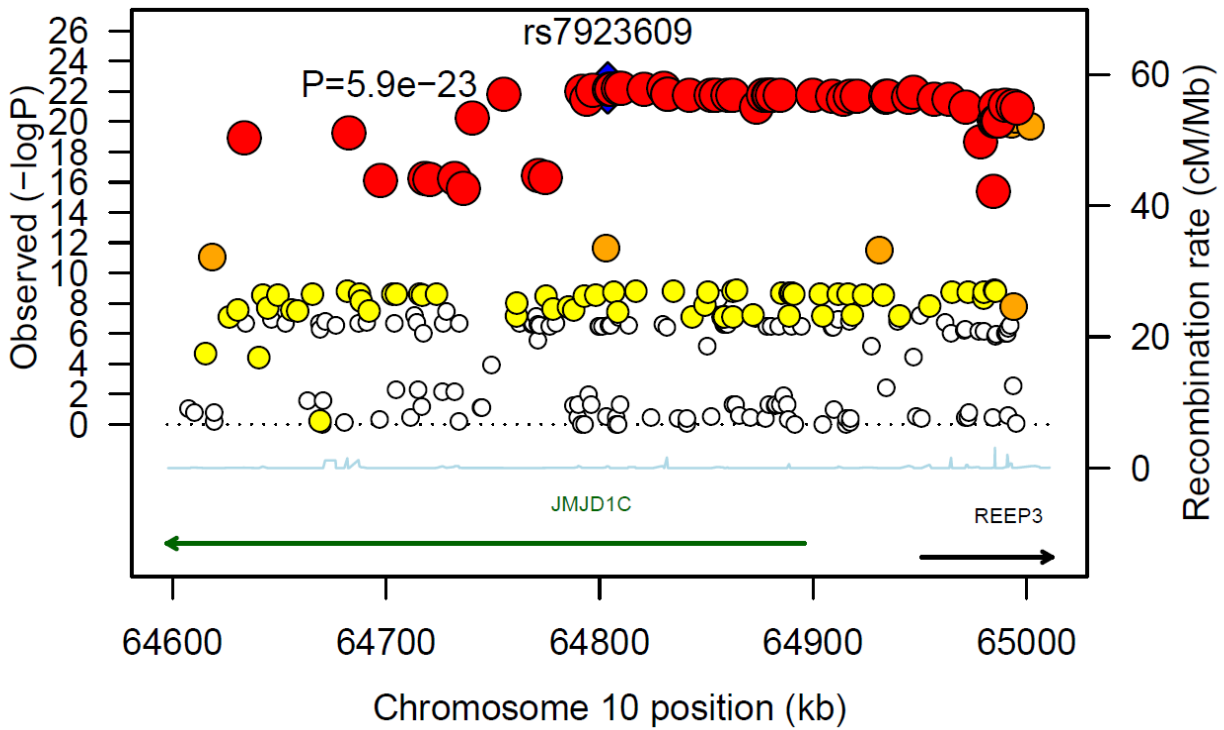

**Figure 2.9** Locus 11q12

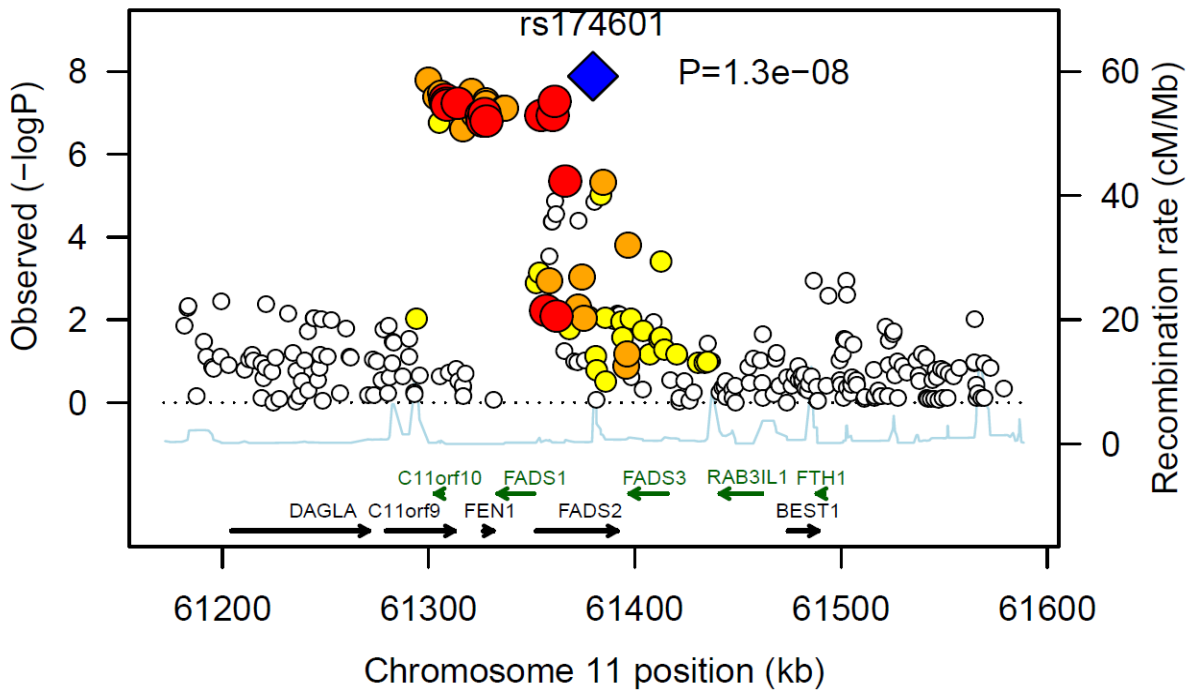

**Figure 2.10** Locus 11q24

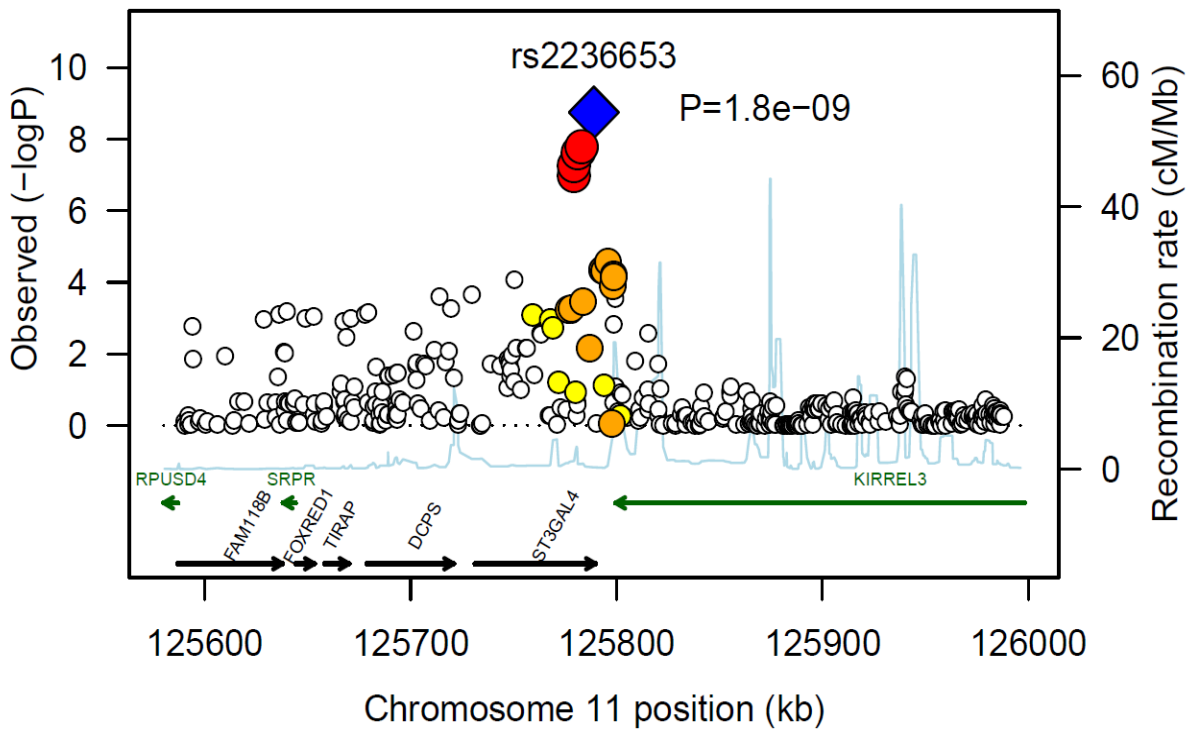

**Figure 2.11** Locus 16q22

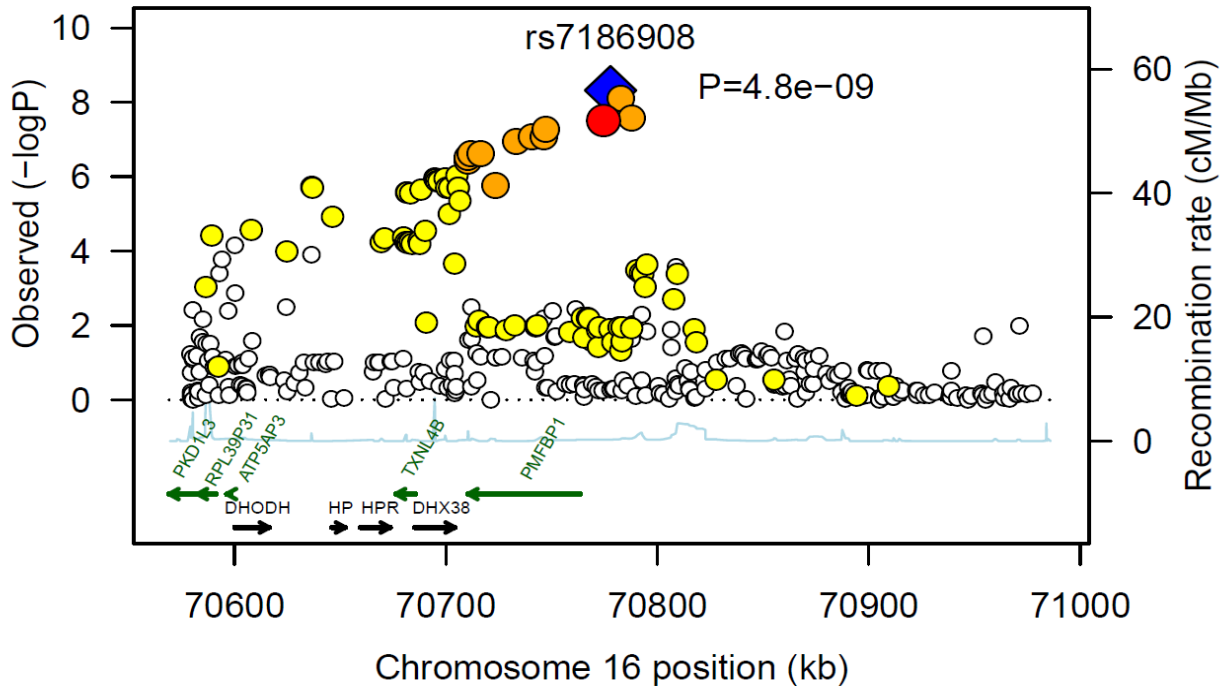

**Figure 2.12** Locus 17p13

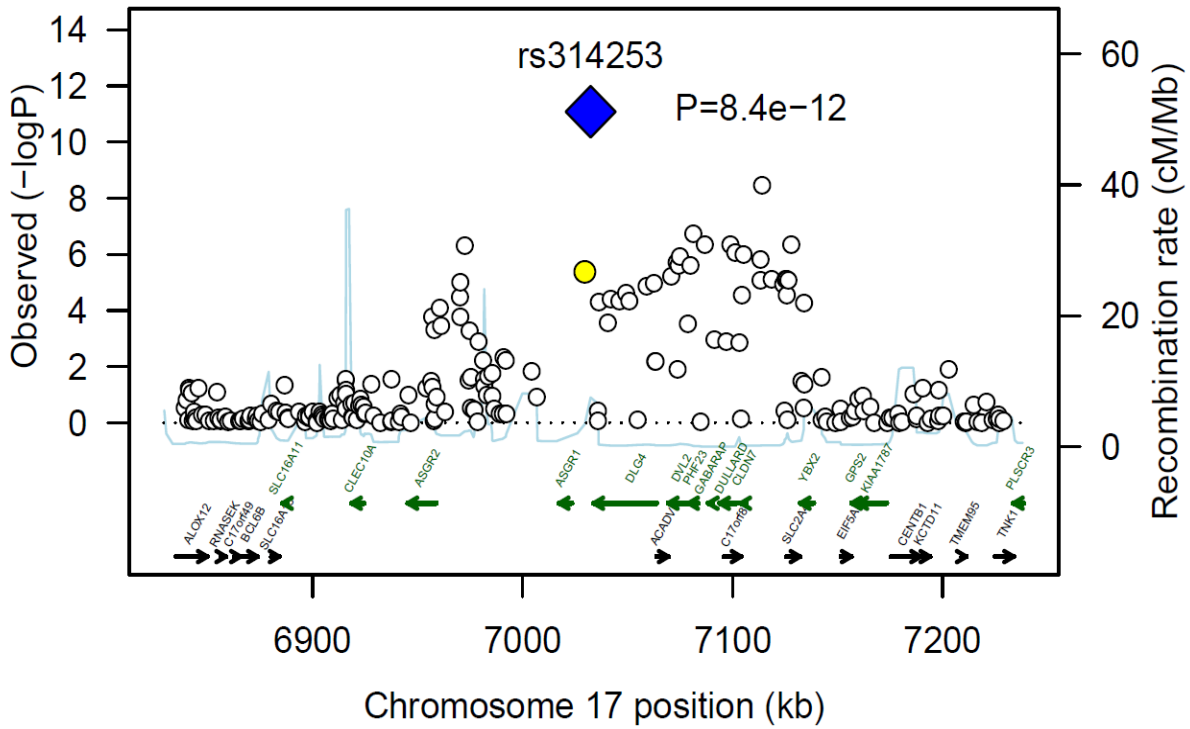

**Figure 2.13** Locus 19q13

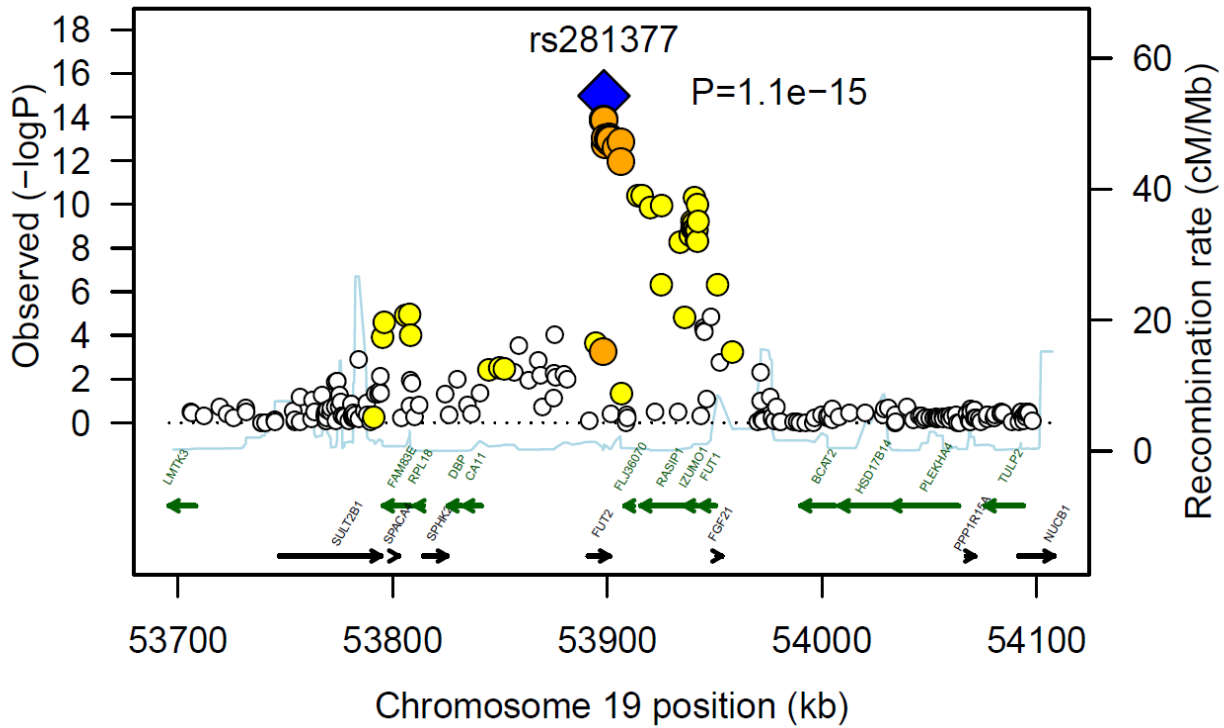

**Figure 2.14** Locus 20p11

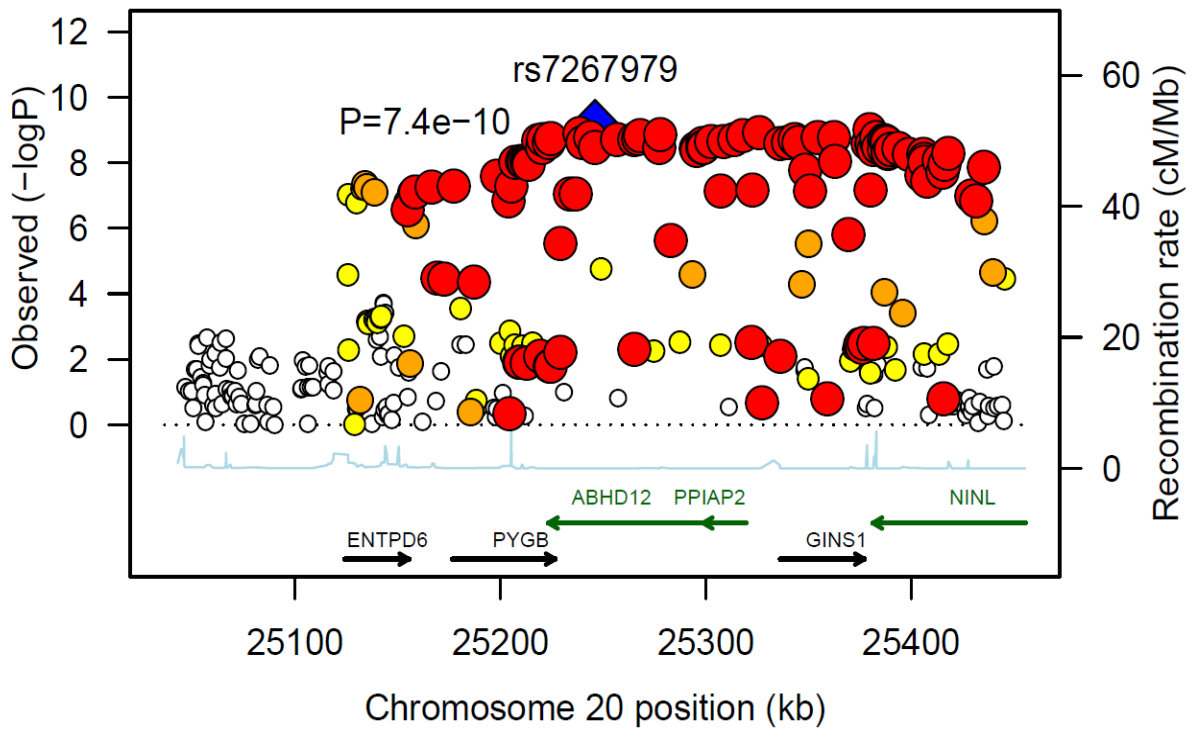

**Supplementary Figure 3.** Regional plots for genetic loci associated with GGT in the genome-wide association study.

**Figure 3.1** Locus 1p36.13

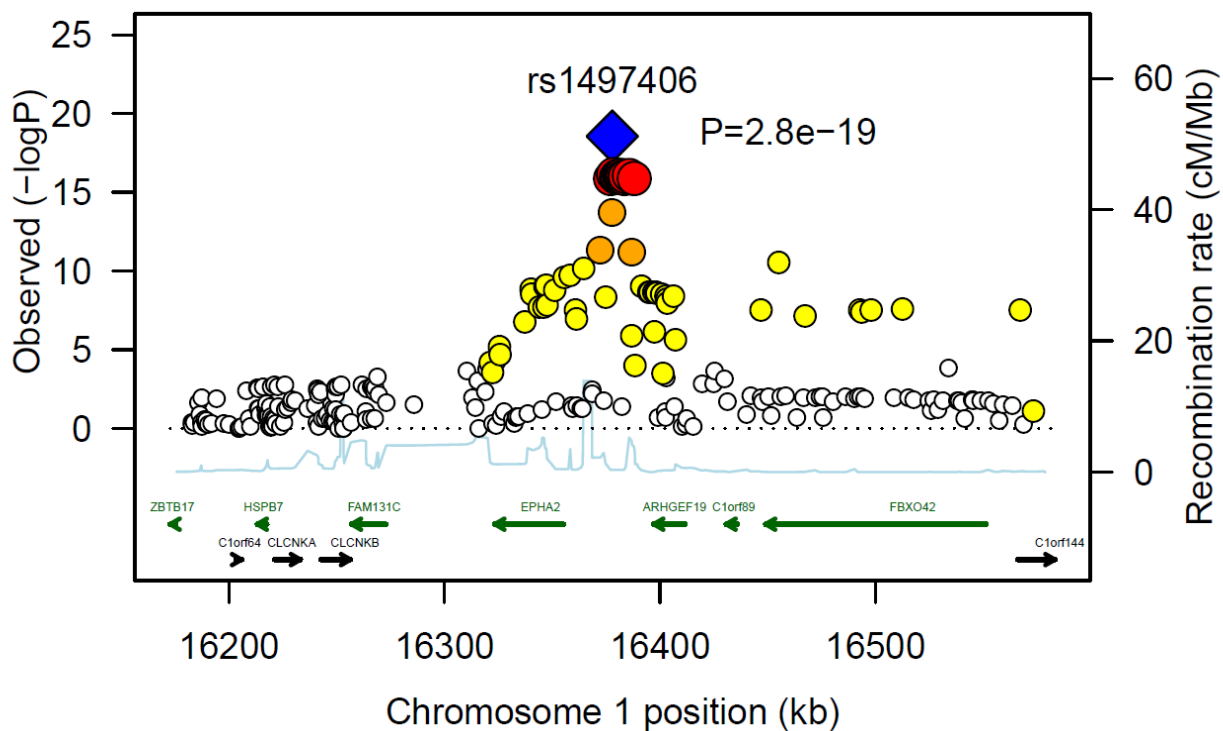

**Figure 3.2** Locus 1p22

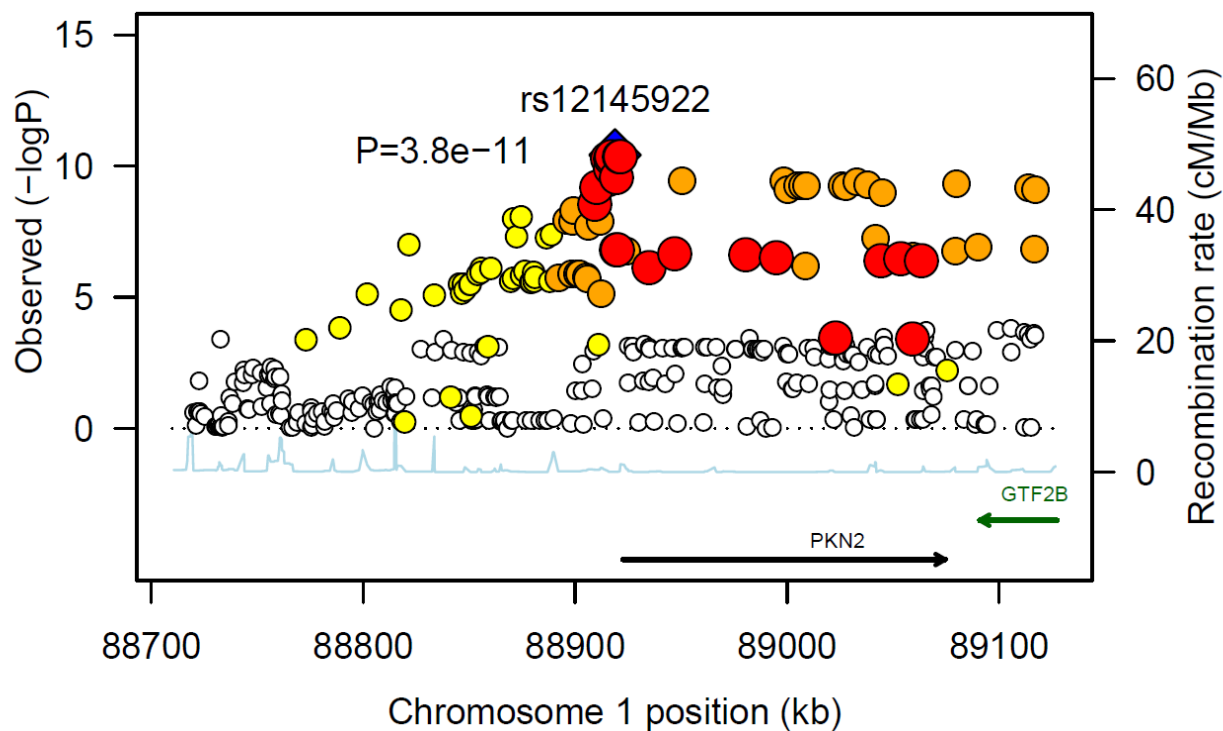

**Figure 3.3** Locus 1p13

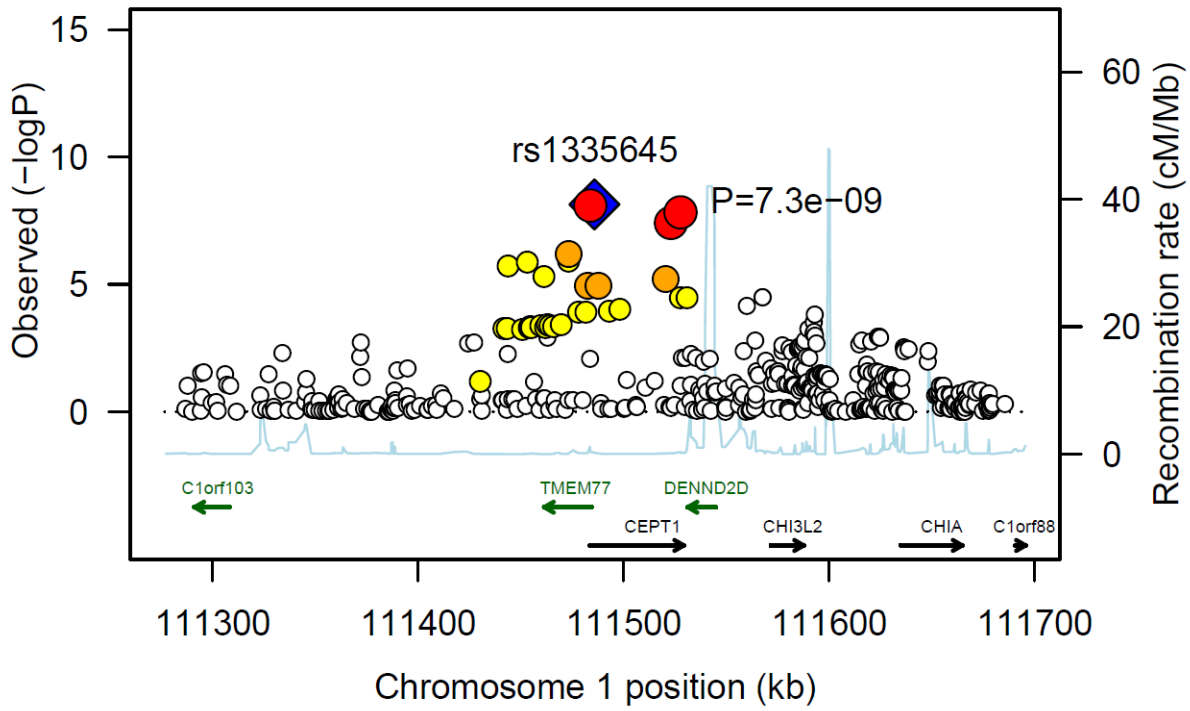

**Figure 3.4** Locus 1q21

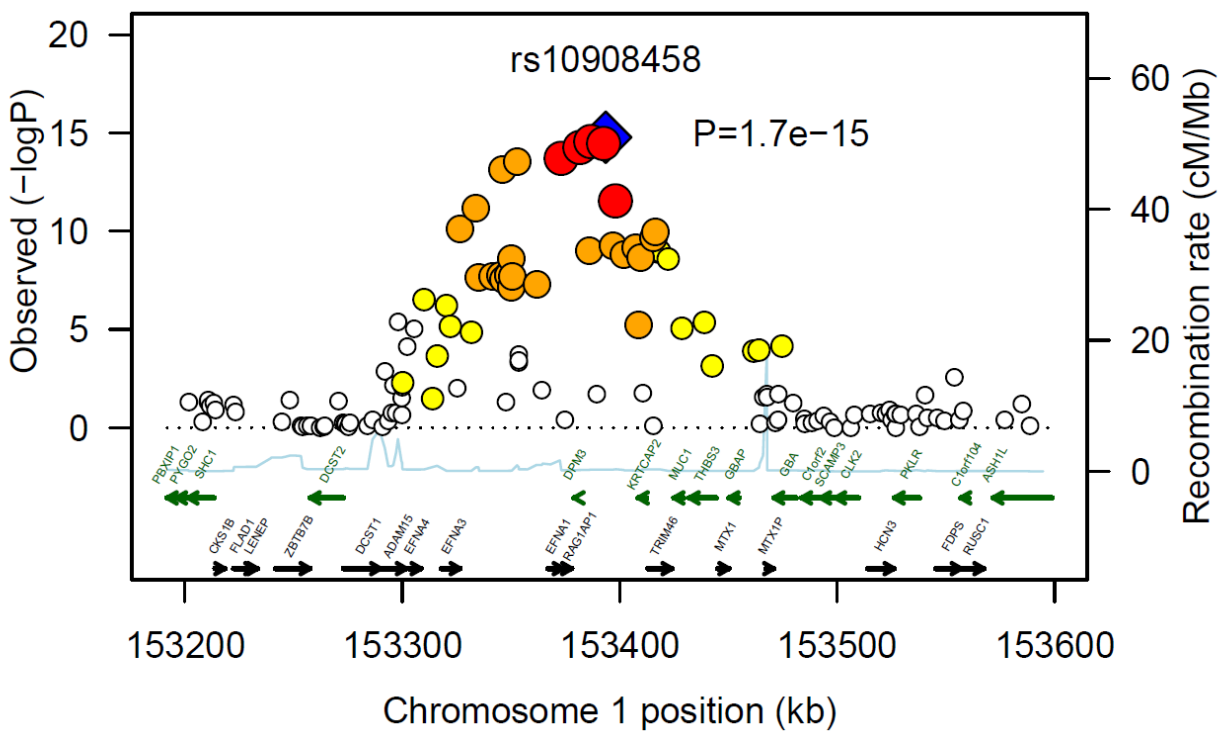



**Figure 3.5** Locus 2p23

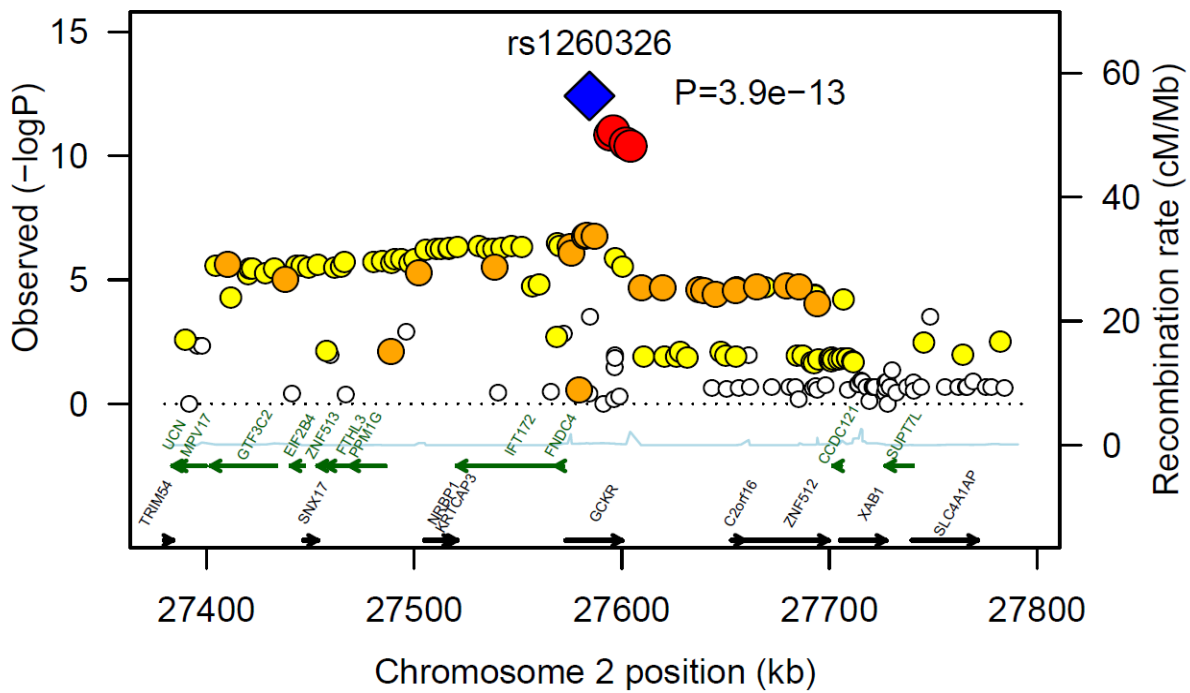

**Figure 3.6** Locus 2q12

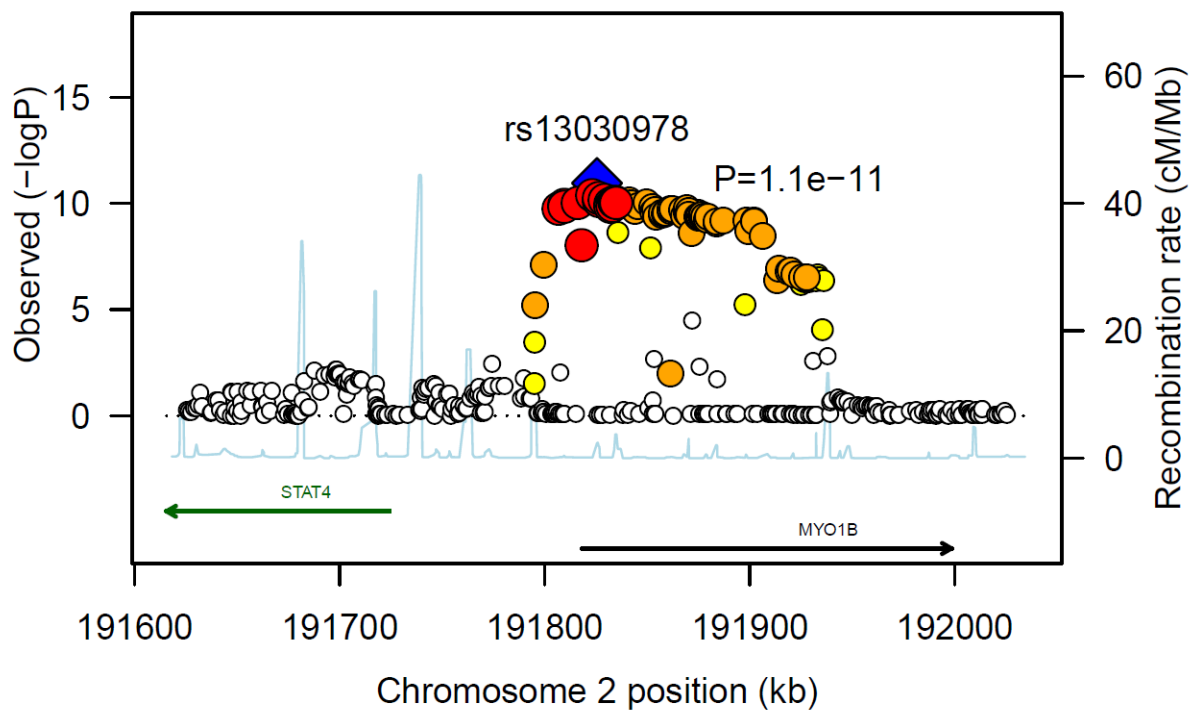

**Figure 3.7** Locus 2q37

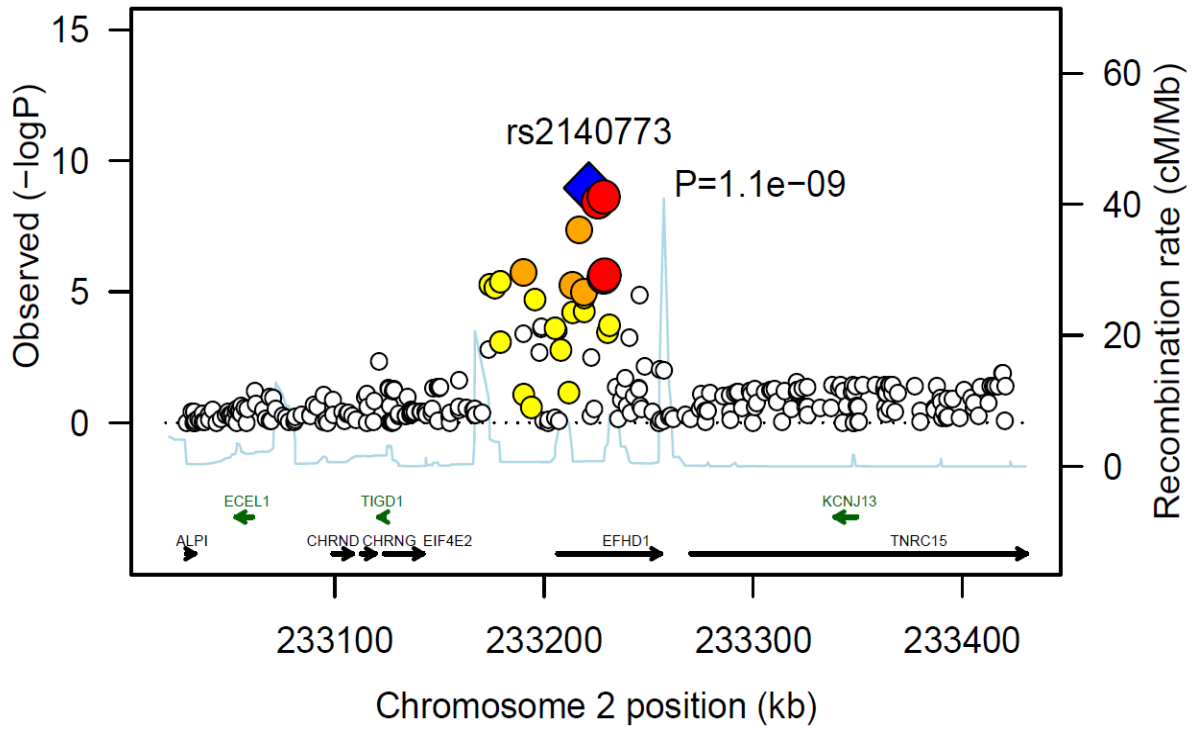

**Figure 3.8** Locus 3q26

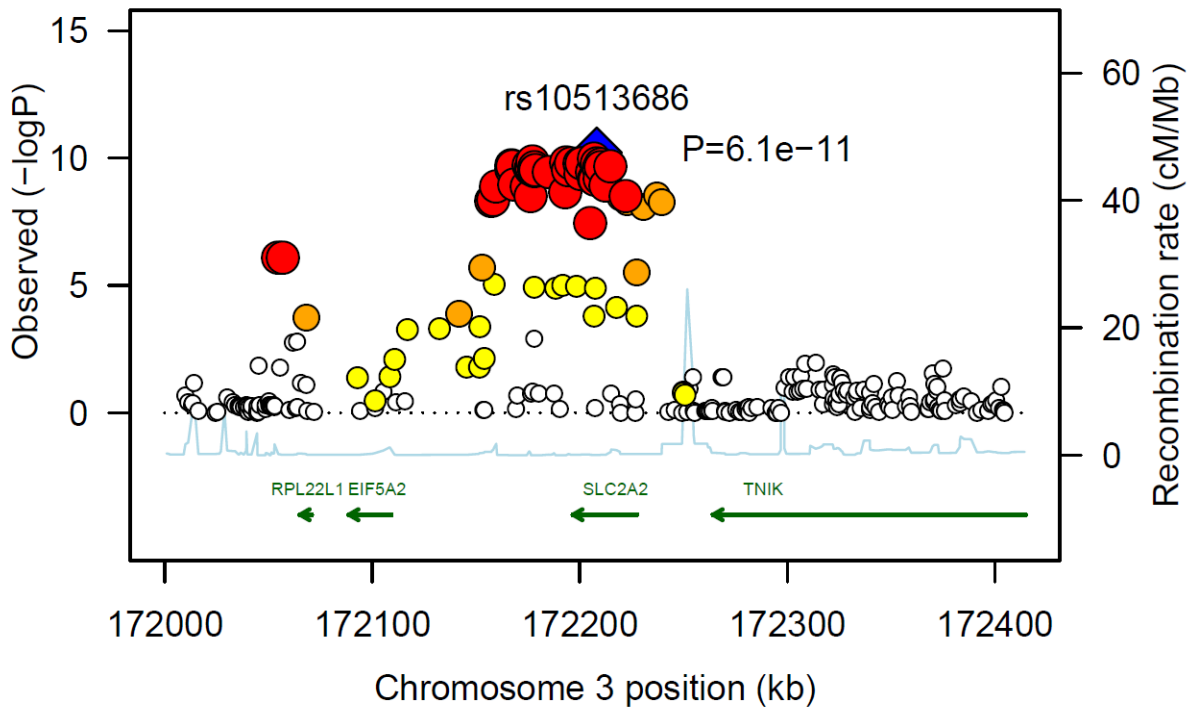

**Figure 3.9** Locus 4q31

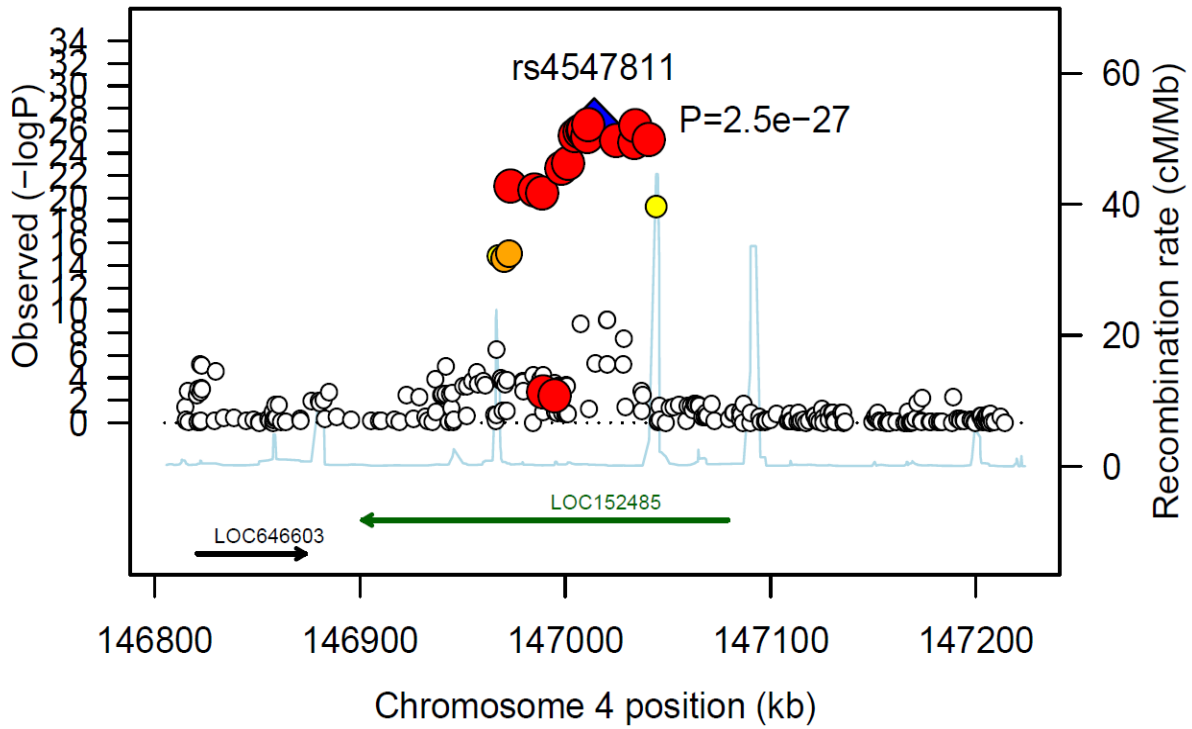

**Figure 3.10** Locus 5p15

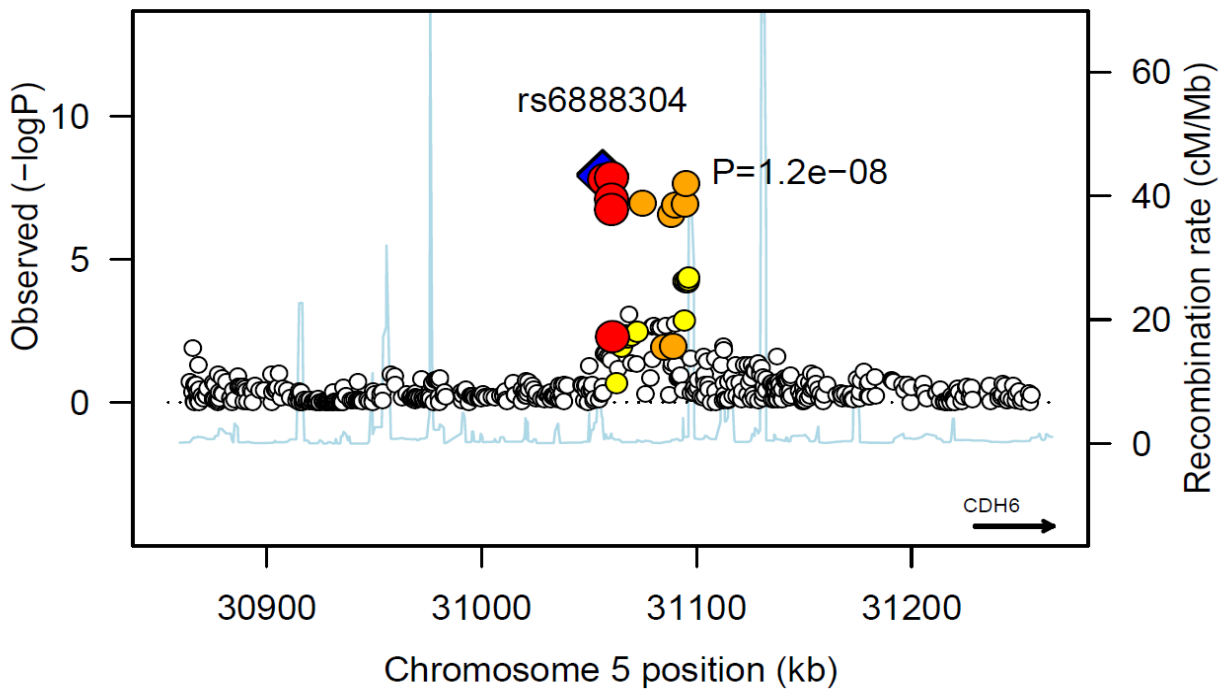

**Figure 3.11** Locus 5q11

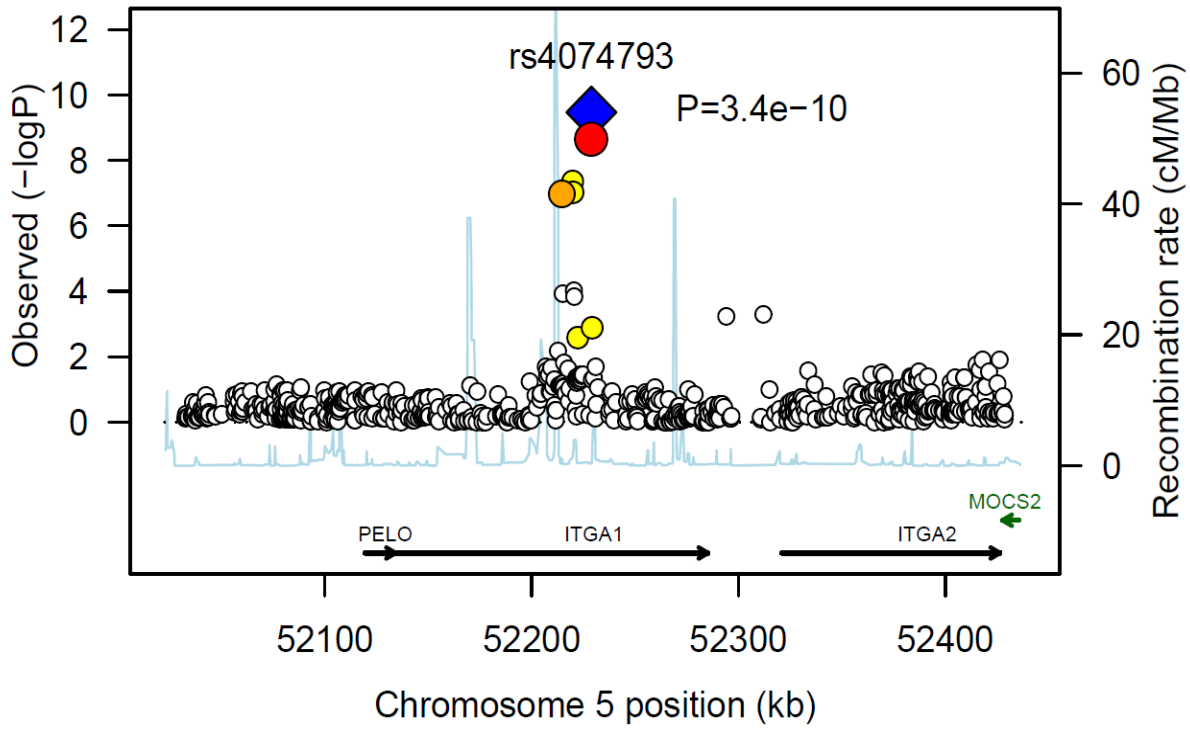

**Figure 3.12** Locus 6p12

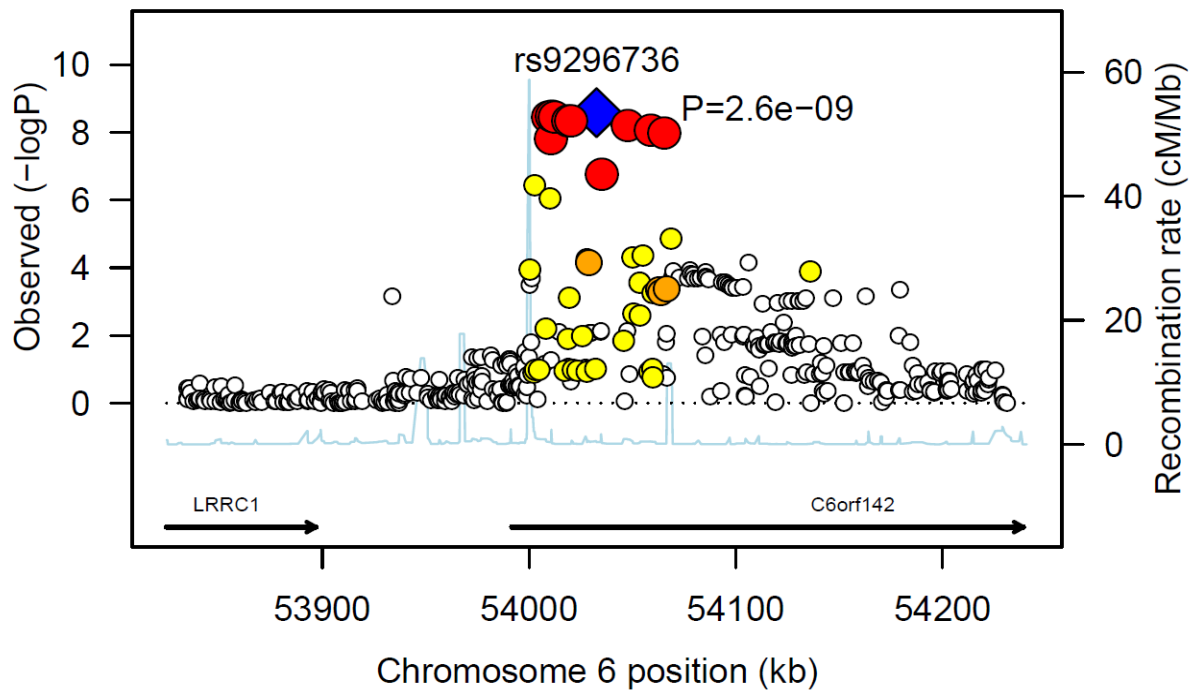

**Figure 3.13** Locus 7q11

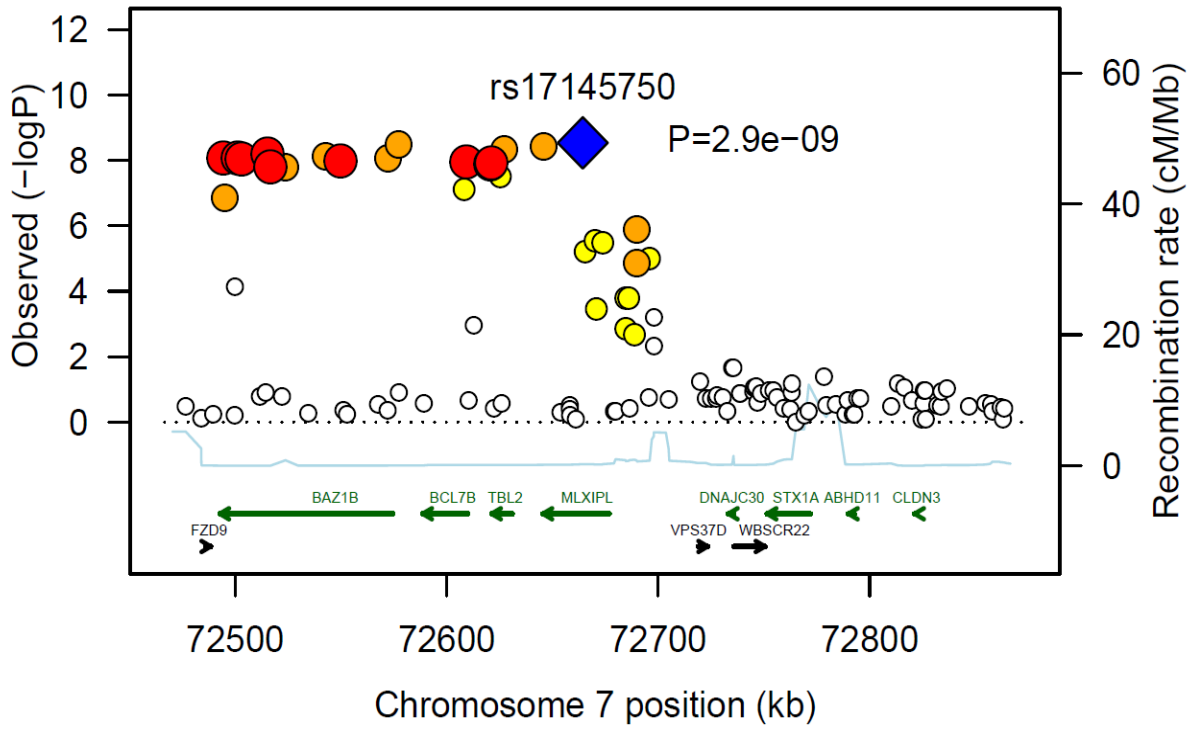

**Figure 3.14** Locus 10q23

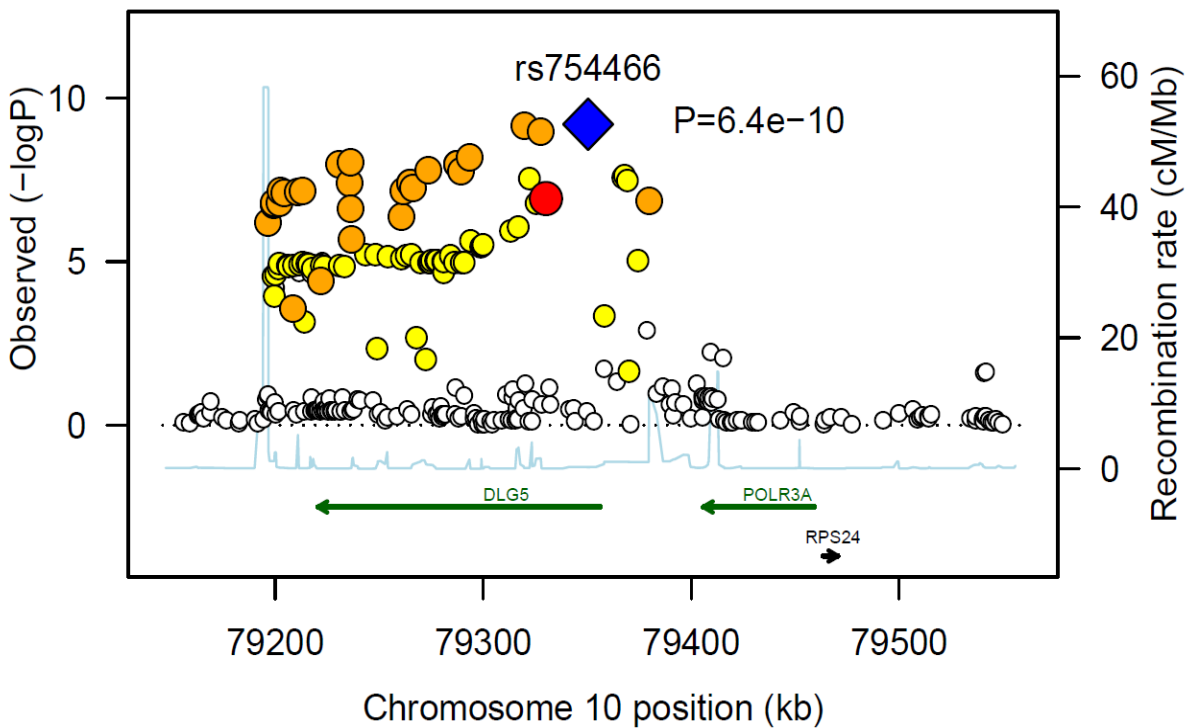

**Figure 3.15** Locus 12q24

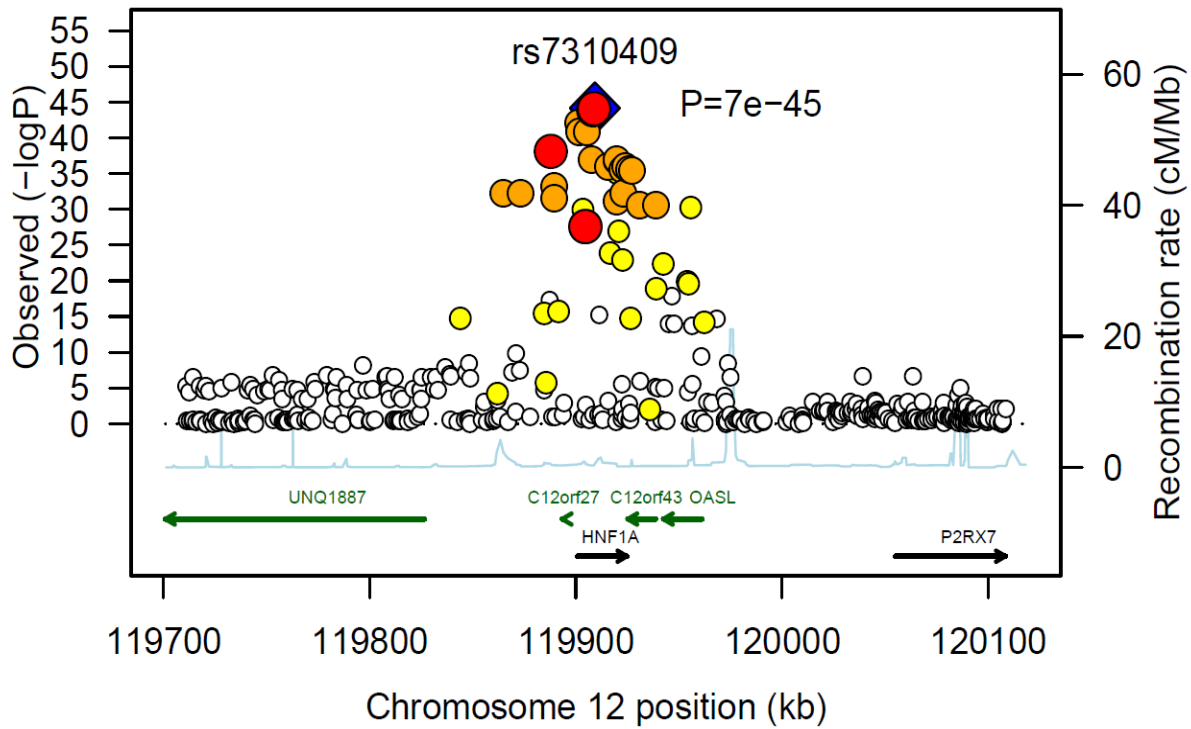

**Figure 3.16** Locus 14q32

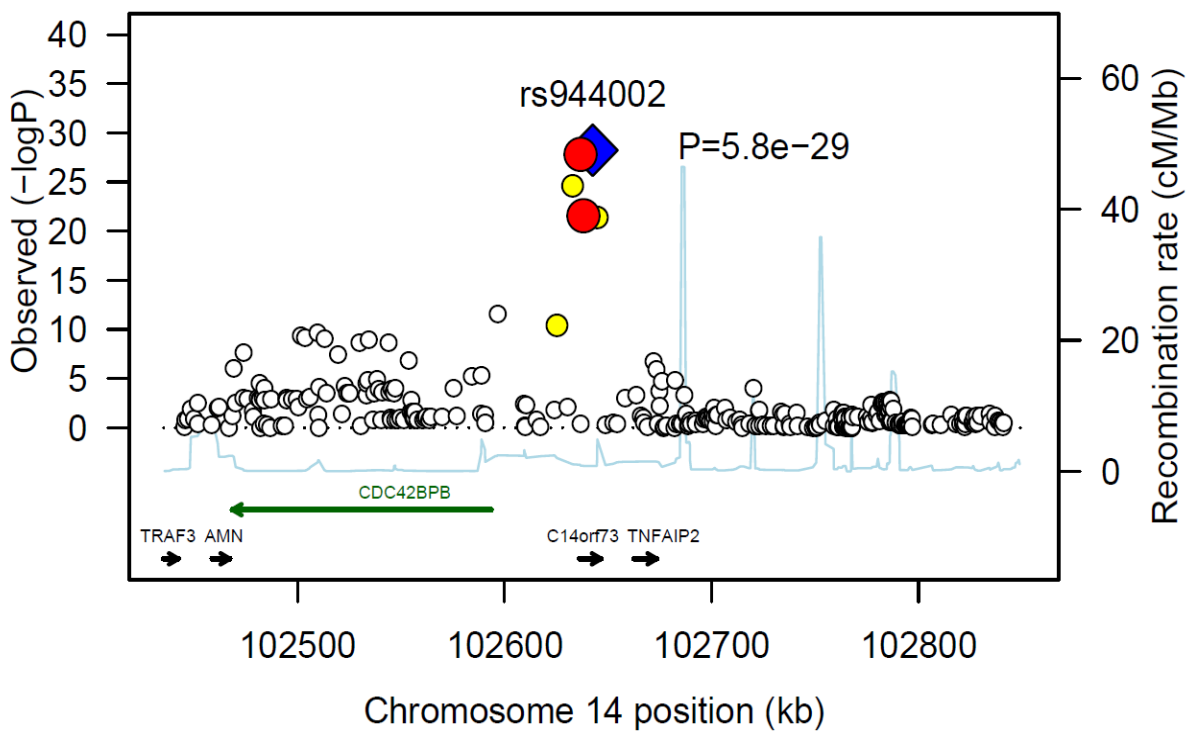

**Figure 3.17** Locus 15q21

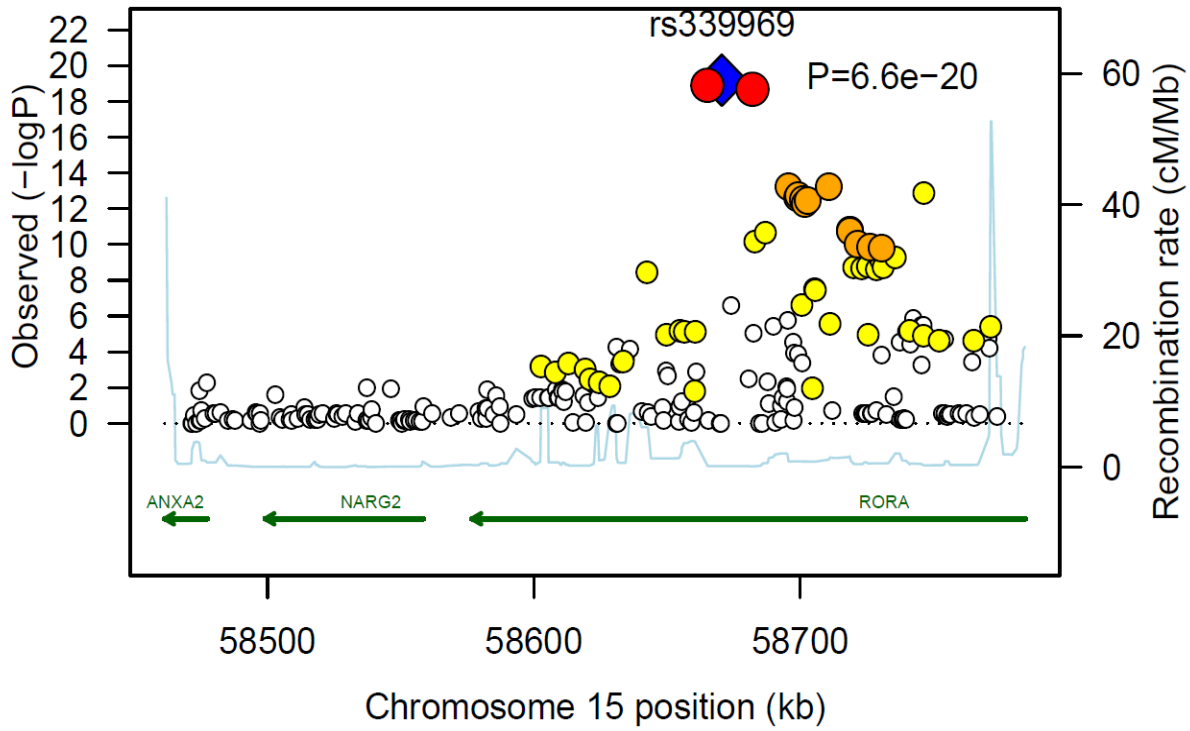

**Figure 3.18** Locus 15q23

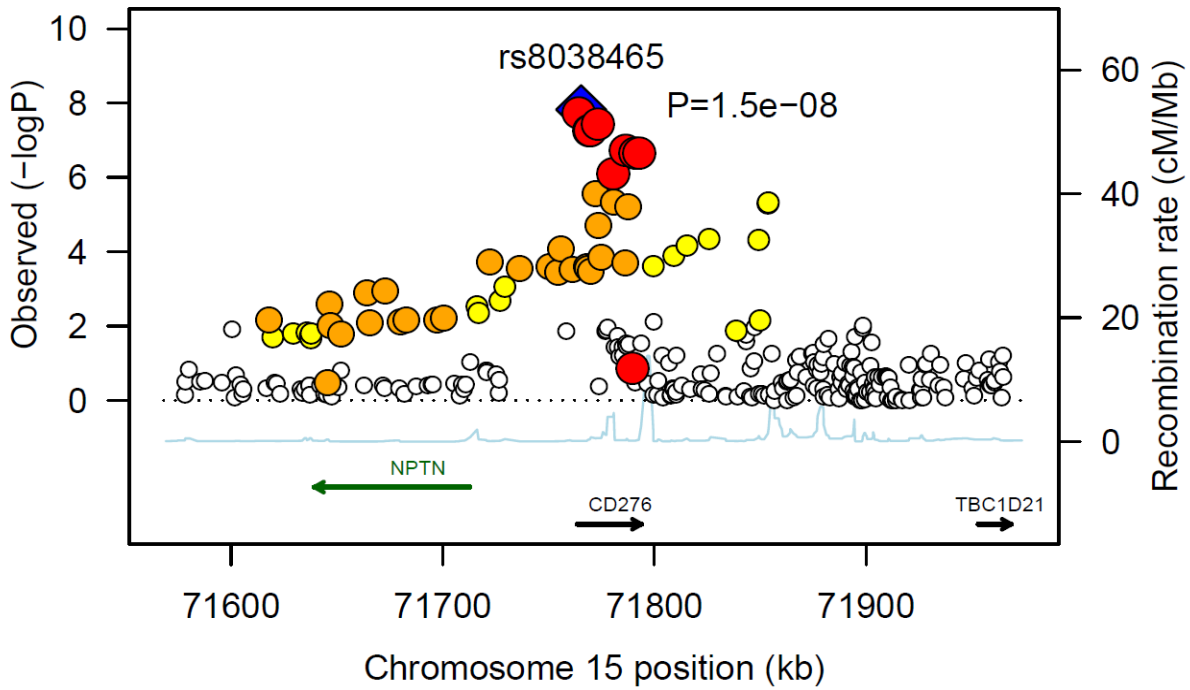

**Figure 3.19** Locus 16q23

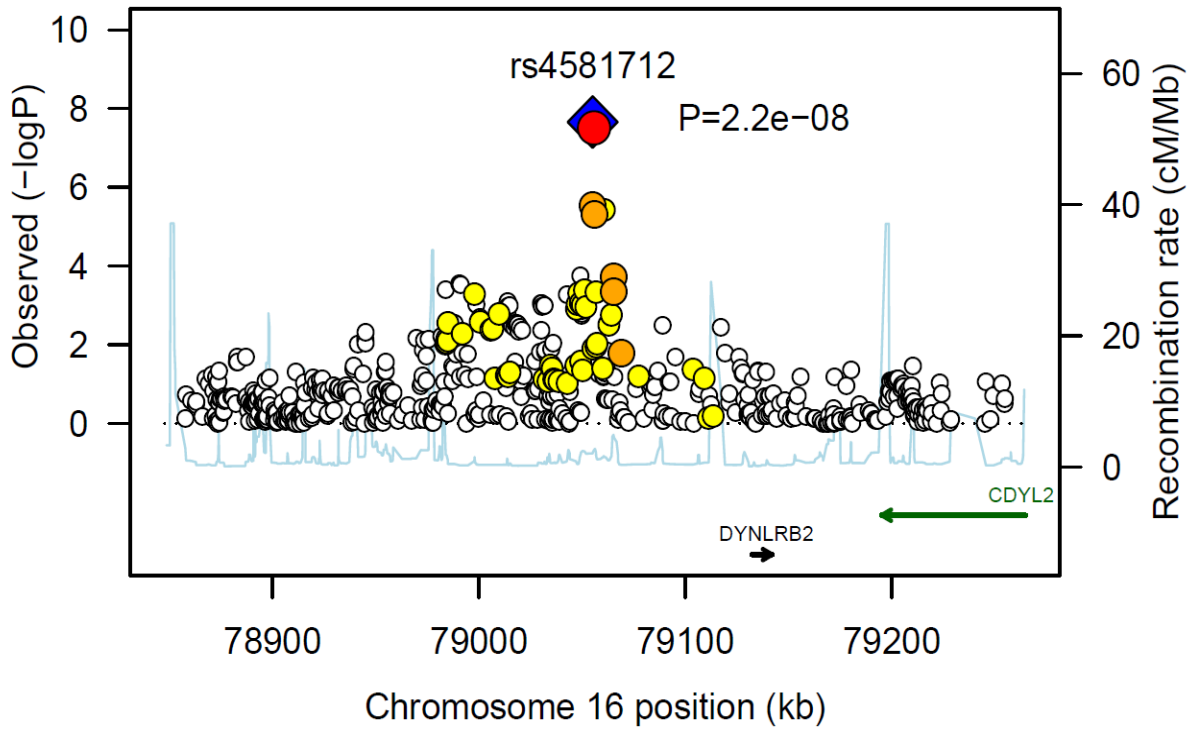

**Figure 3.20** Locus 17q24

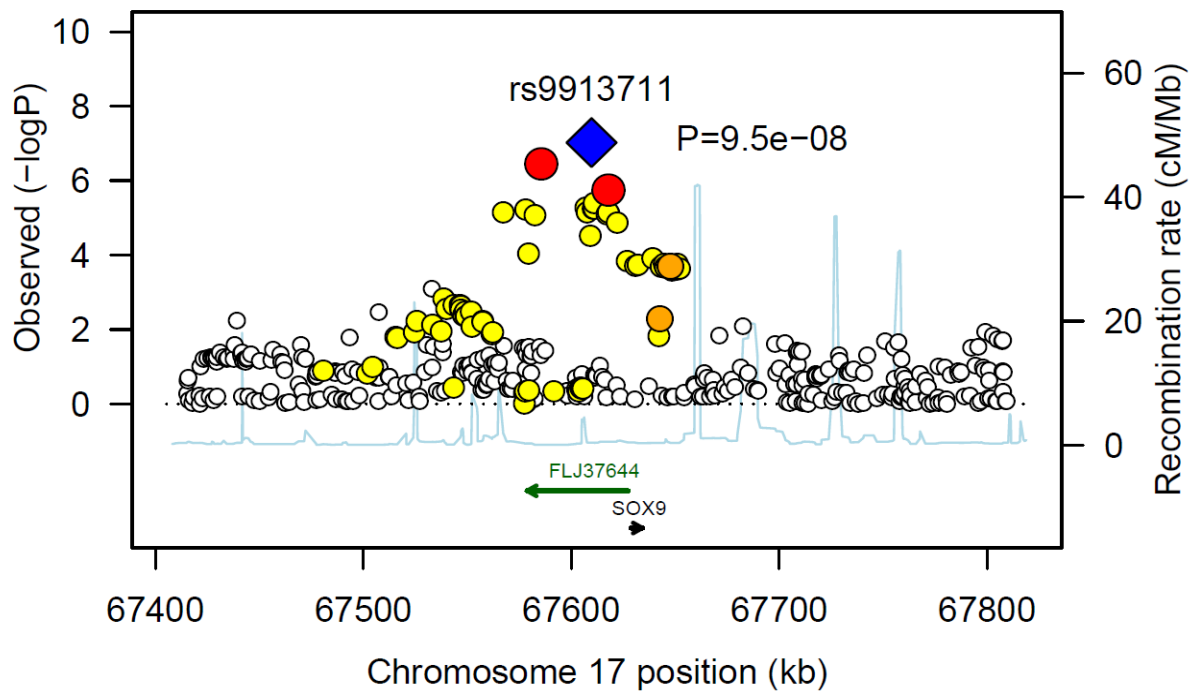



**Figure 3.21** Locus 18q21.31

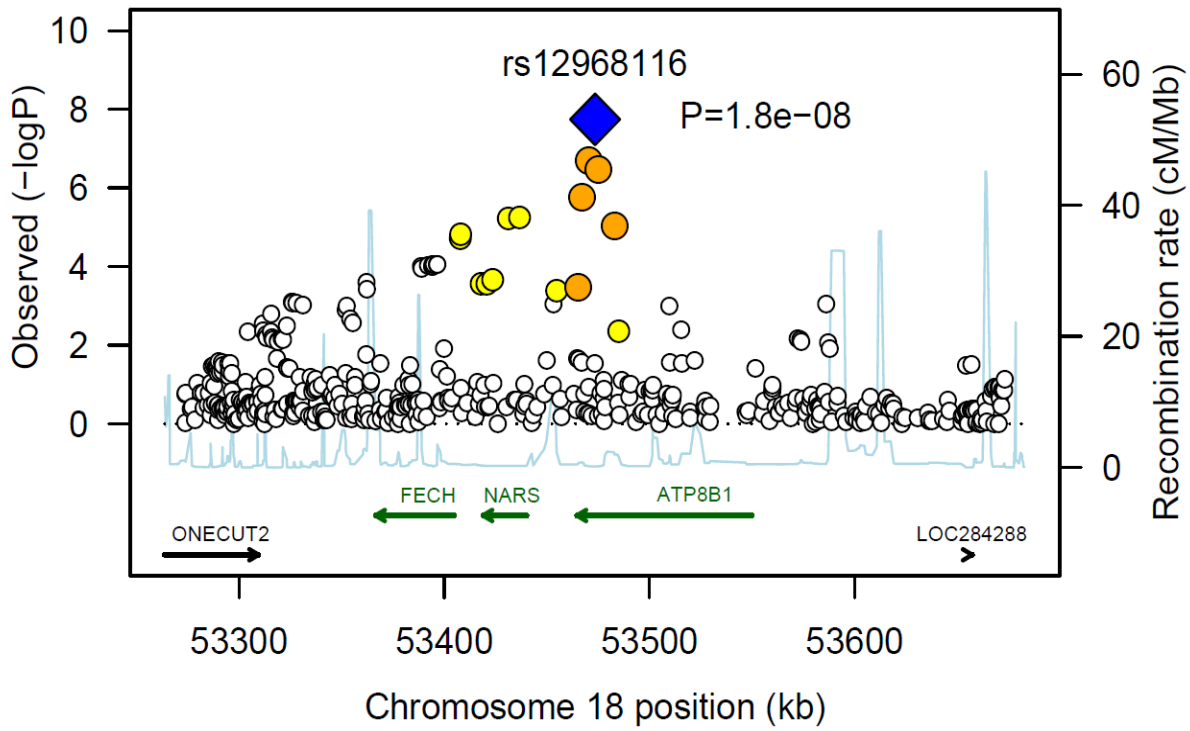

**Figure 3.22** Locus 18q21.32

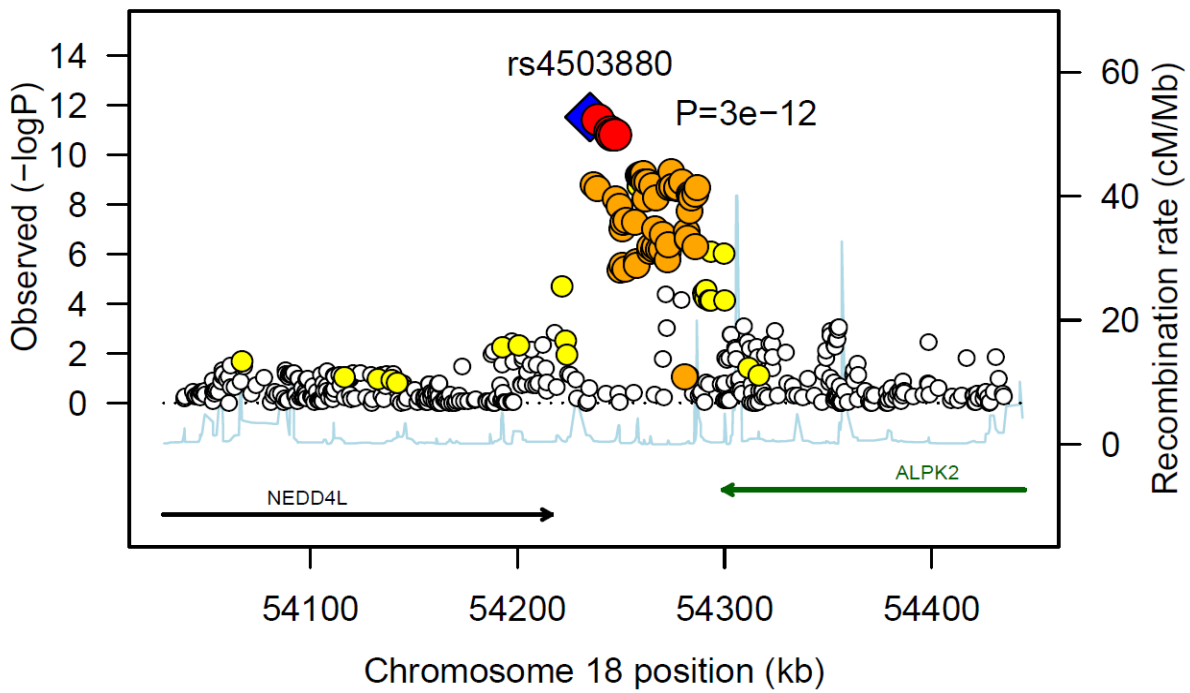

**Figure 3.23** Locus 19q13

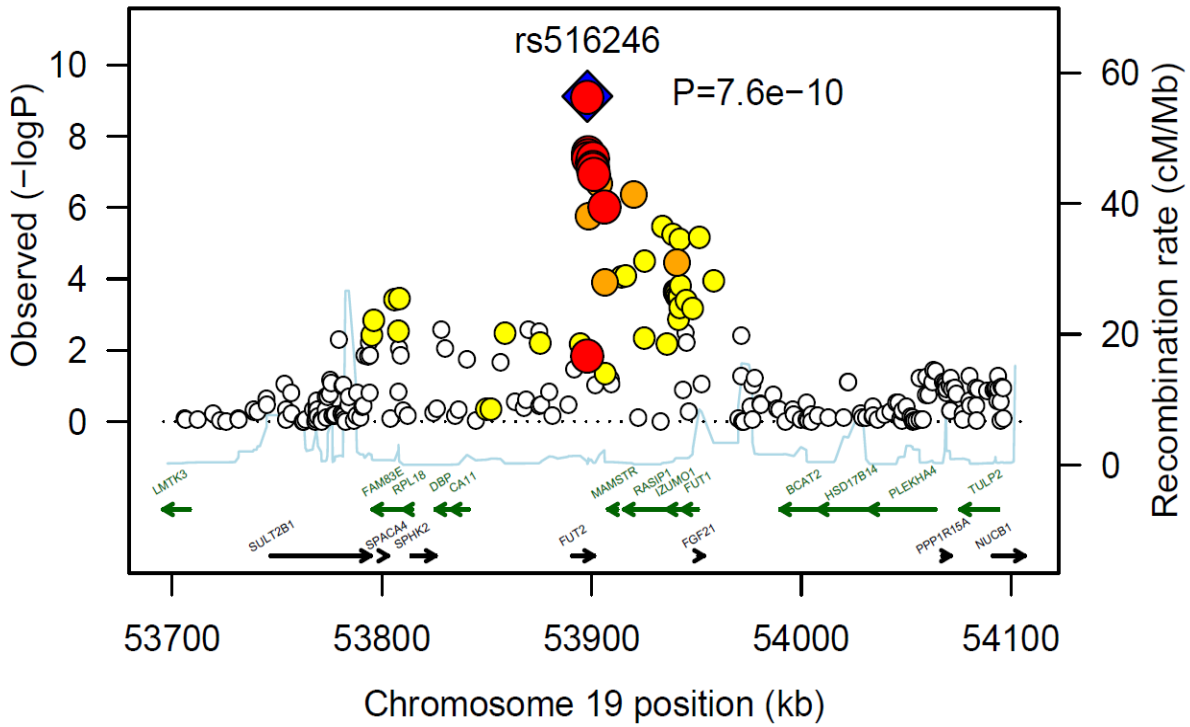

**Figure 3.24** Locus 22q11.21

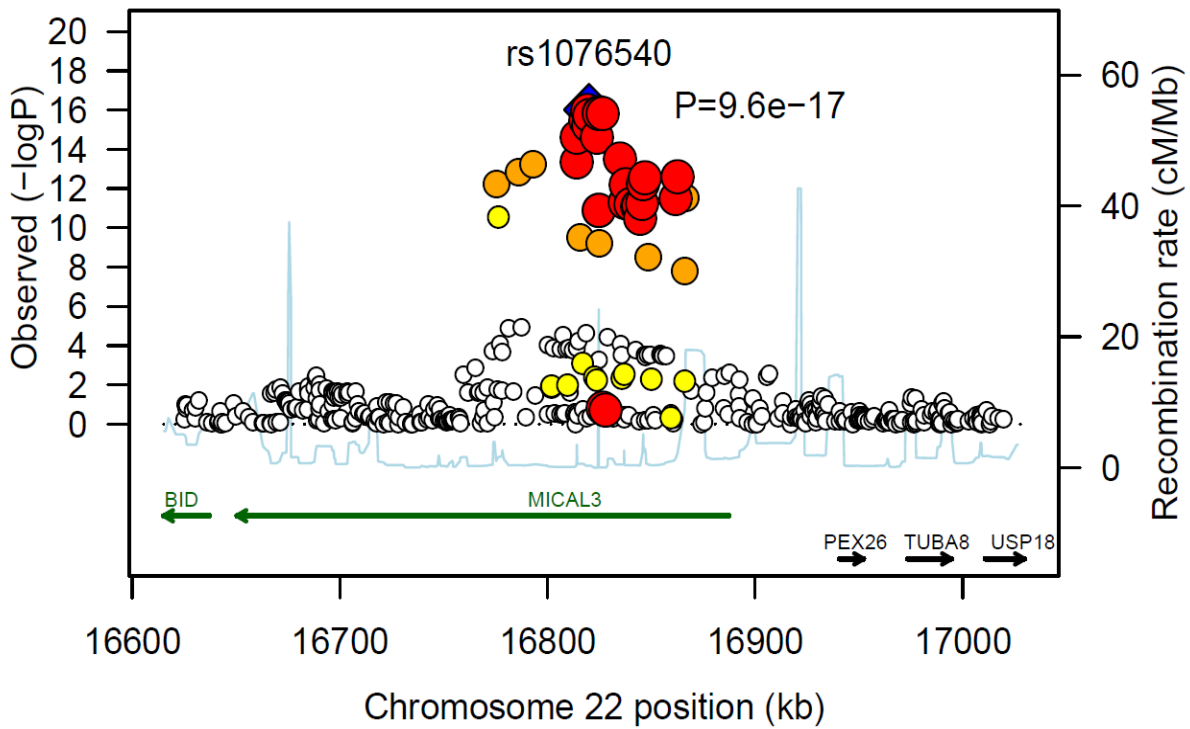

**Figure 3.25** Locus 22q11.23

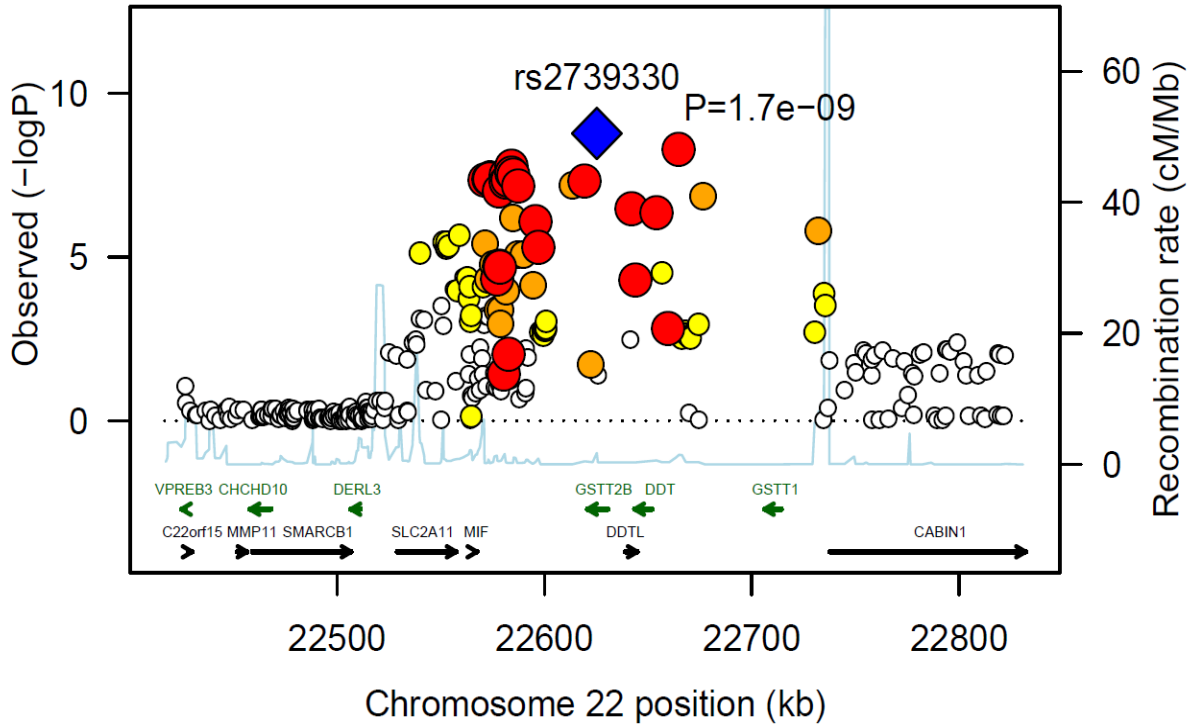

**Figure 3.26** Locus 22q11.23

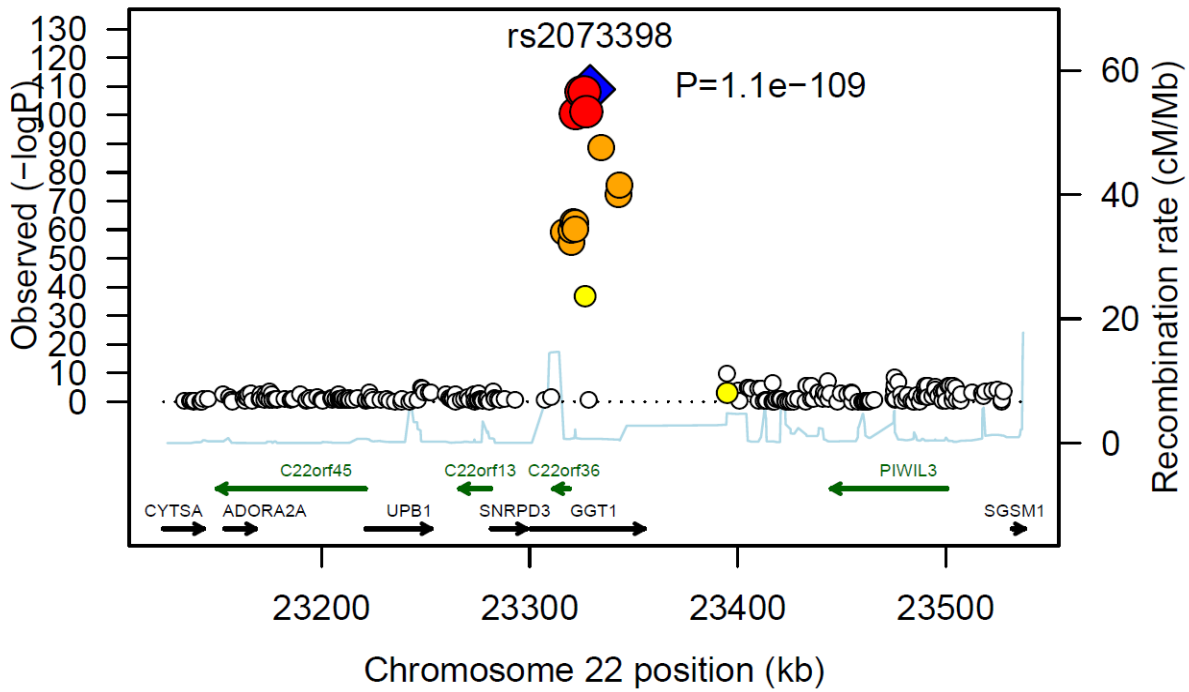

**Supplementary Figure 4.** Heatmap (4a) and venn diagram (4b) summarising the association of the 42 loci identified with liver markers in the genome-wide association study. In addition to associations at  $P < 1 \times 10^{-8}$  with respective discovery marker, 16 loci showed secondary associations with other liver markers at  $P < 6 \times 10^{-4}$  ( $P < 0.05$  after Bonferroni correction).

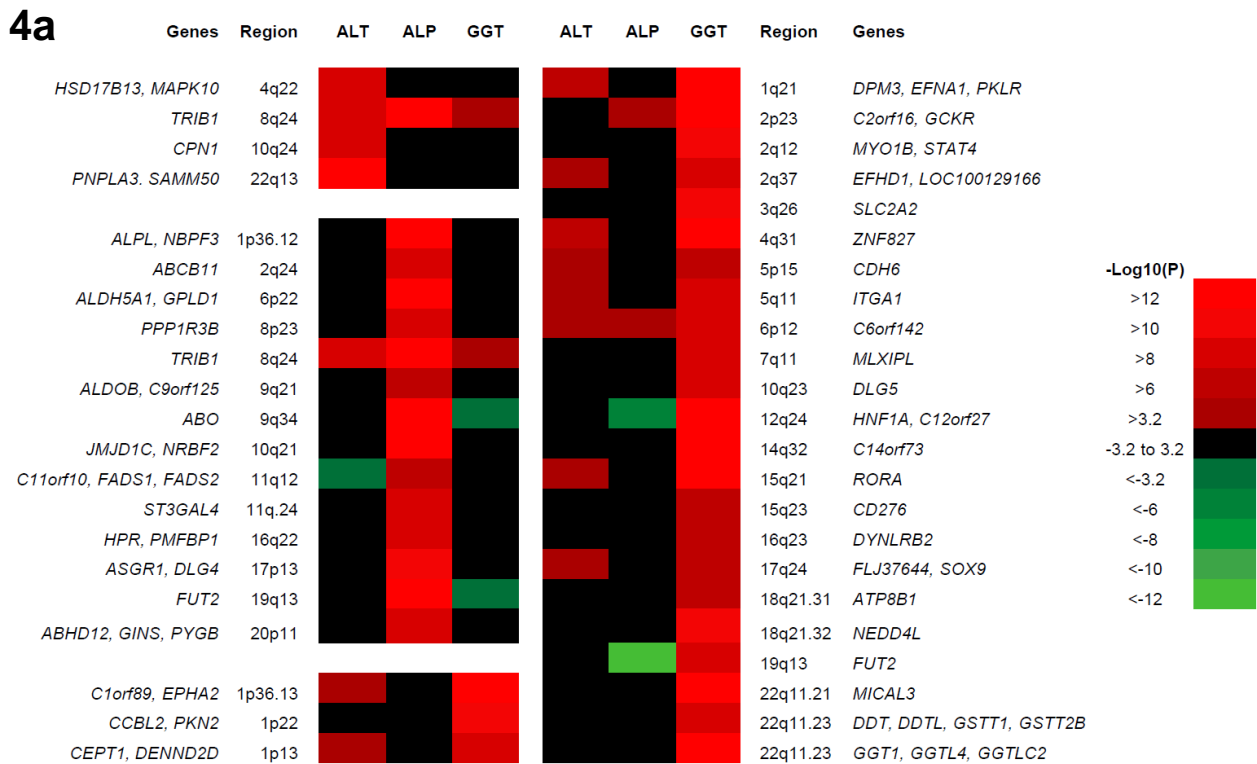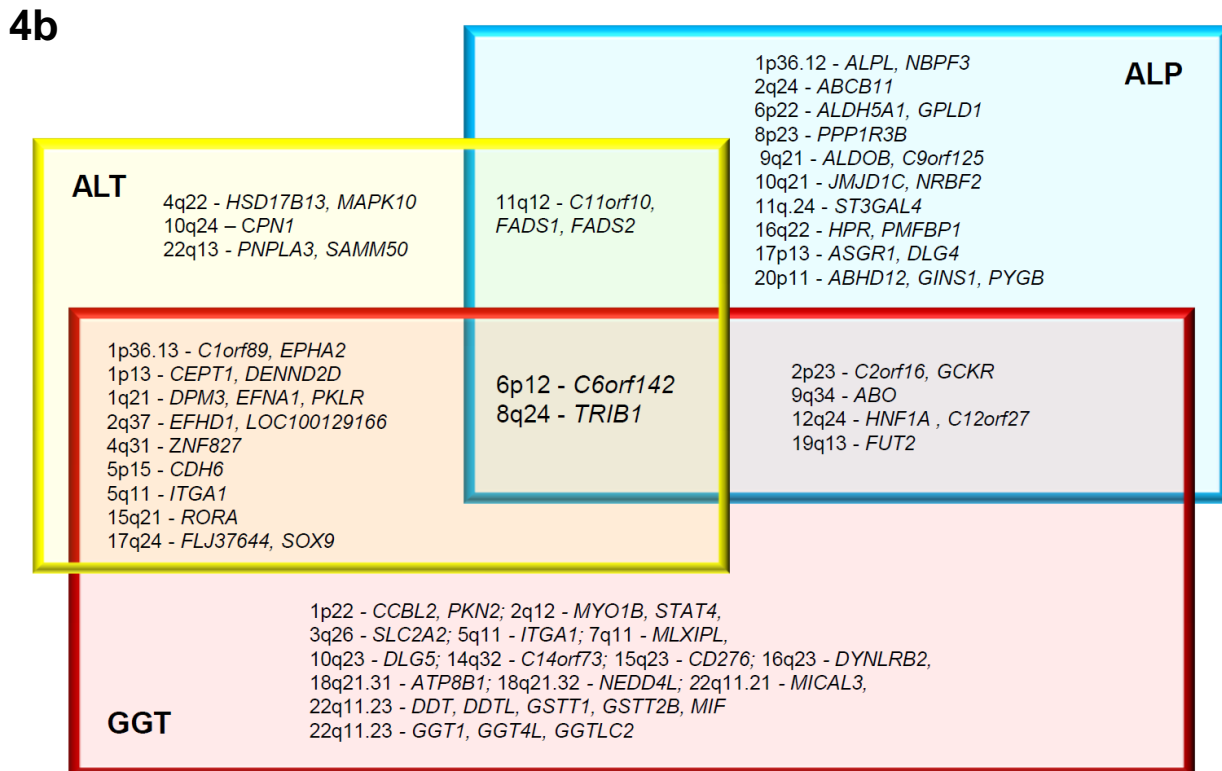

**Supplementary Figure 5.** Molecular models illustrating positions and predicted molecular changes of coding variants identified. Models generated using Phyre<sup>106</sup> and 3DLigandSite.<sup>107</sup>

**5a. ATP8B1.** Coding variant R952Q is located in the 5<sup>th</sup> transmembrane helix of this plasma membrane protein. The variation from arginine (larger, charged), to glutamine (smaller, uncharged) is non-conservative. The variant (highlighted red) is close to residues that are functionally important in homologous calcium transporters (highlighted orange).<sup>108</sup>

**5b. C14orf73.** R77W is a non-conservative change from a polar basic amino acid to a non-polar hydrophobic amino acid. The affected residue is in an alpha helix and the amino acid change to tryptophan is likely to disrupt tertiary structure of the protein. L185H is predicted to be conservative as both residues are polar and basic. The SNP residues are shown in stick and spacefill formats with the side chains of the two different amino acids displayed.

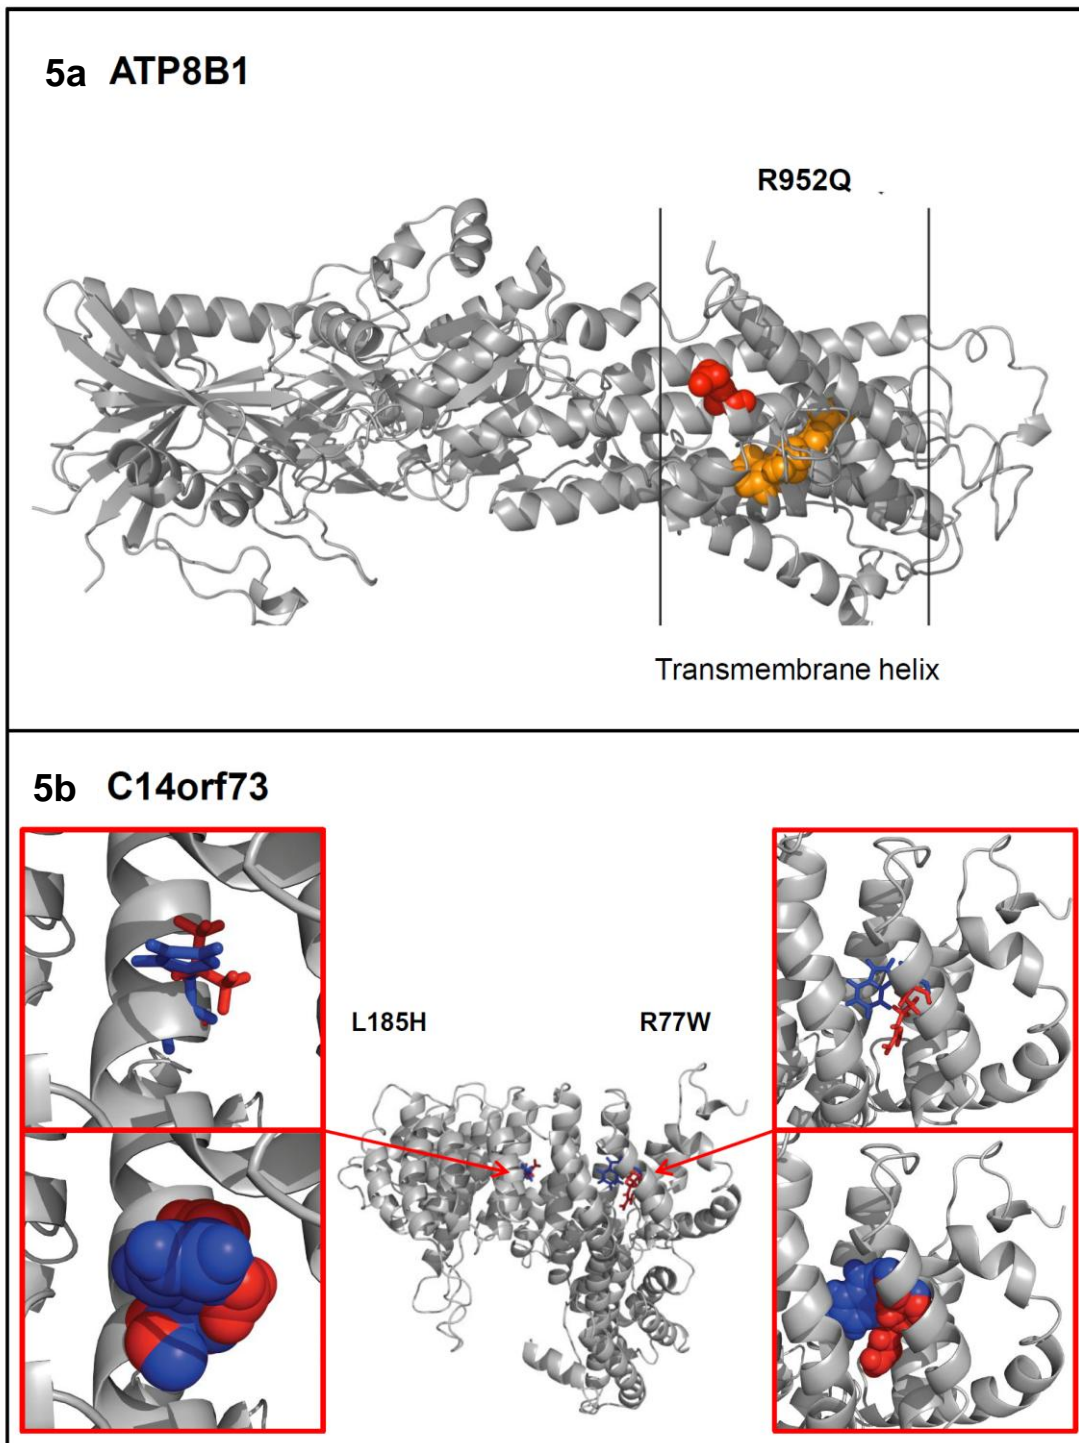



**Supplementary Figure 6.** Results of pathway analysis carried out for the 69 candidate genes identified at the 42 liver marker loci, using the Ingenuity Pathway Analysis tool (IPA, Ingenuity Systems, USA).

**6a.** Top network identified - IPA description "Lipid Metabolism, Small Molecule Biochemistry and Carbohydrate Metabolism". Candidate genes from liver marker loci are highlighted in red. Edge annotations are as follows: expression (E); protein-DNA binding (PD); protein-protein binding (PP); localisation (LO); activation (A); regulation of binding (RB); phosphorylation / dephosphorylation (P). Direct interactions are indicated by solid lines and indirect interactions by dashed lines.

**6b.** Symbols used to represent protein type/function.

**6c and 6d:** Canonical Pathways (**6c**) and Functions (**6d**) significant at  $P < 0.05$  after correction for multiple testing.

6a

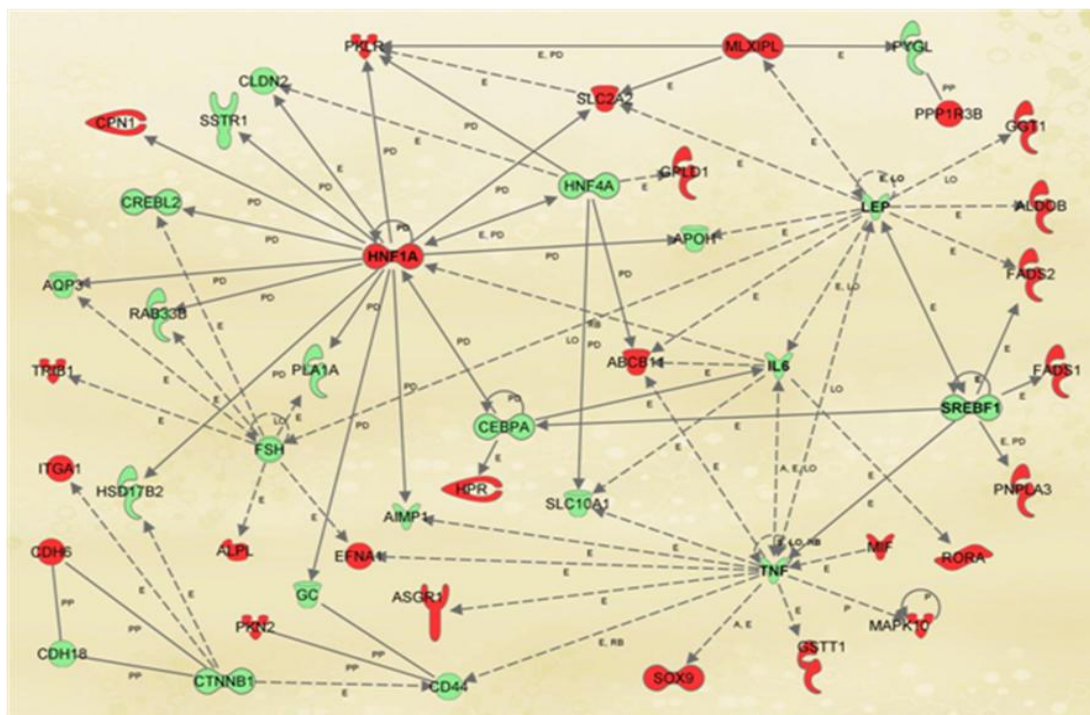

6b

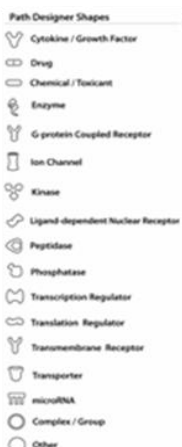

6c

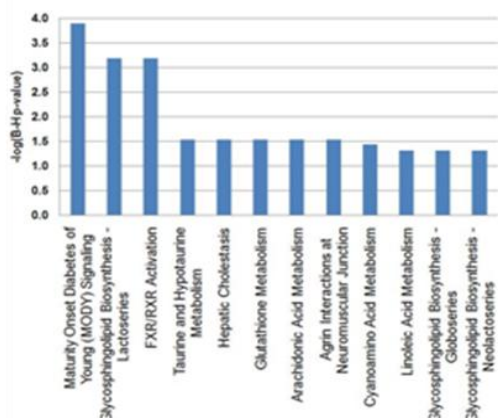

6d

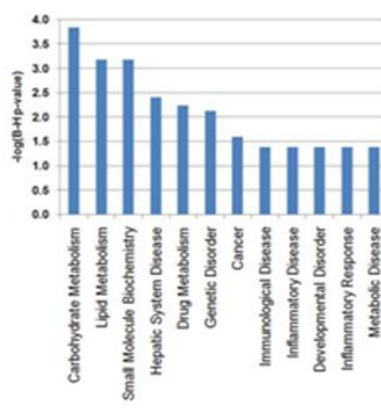

## Supplementary Note

### *Participating cohorts*

Genome-wide association was done amongst 61,089 participants from the following studies: the Australian Twin cohort (N=425) a study based on Australian twin pairs born before 1964 who participated in questionnaire- and interview-based studies on psychological and metabolic risk factors for psychiatric and cardiovascular disease; the British Genetics of Hypertension study (BRIGHT, N=1,955) comprising hypertensive probands from families with multiplex affected sibships or parent–offspring trios, of British ancestry and recruited through primary care practices; the Lausanne Cohort (CoLaus, N=5,636), a cross-sectional study of a random sample of European men and women, aged 35–75 yrs, living in Lausanne, Switzerland, deCODE genetics (N=12,572) is a population-based genomics study aiming to collate health records, genealogical information, and genetic data of the entire Icelandic population; the Fenland study (N=1,397), an ongoing population based cohort of men and women born between 1950 and 1975 and living in Eastern England; the Finnish Twin cohort study (FinnTwin N=32) which comprised MZ twin pairs, who were a subset of clinically assessed twins recruited from a population-based longitudinal study of five consecutive birth cohorts (1975–1979) of twins, their siblings and parents, identified through the national population registry of Finland; the Framingham Heart Study is a longitudinal observational, community-based cohort initiated in 1948 to prospectively investigate cardiovascular disease and its risk factors. (N=2,869); the Monica/KORA Augsburg study (KORA, N=1,809) an independent population-based sample from the general population living in the region of Augsburg, Southern Germany; the London Life Sciences Population study (LOLIPOP, N=10,338), a population based cohort of men and women, aged 35-75 years, living in West London, UK; the Northern Finland Birth Cohort 1966 (NFBC1966, N=4,562), a prospective birth cohort of persons born in 1966 in the two northernmost provinces of Finland; the Netherlands Study of Depression and Anxiety (NESDA, N=1,724) of men and women aged 18-65 years with depression, anxiety or at increased risk of psychiatric problems in the Netherlands population; the Netherlands Twin study (N=1,721) is a longitudinal study which began in 1986 and conducts longitudinal studies in cohorts of newborn, adolescent and adult twins and their family members; the Precocious coronary artery disease study (Procardis, N=1,239) is a multicenter case–control study aiming to discover novel susceptibility genes for coronary artery disease; the Rotterdam Study 1 (RS1, N=4,312), a prospective population-based cohort study investigating the determinants of chronic diseases among participants aged 55 years and older; the SardiNIA study (N=4,302) a longitudinal study of aging-related quantitative traits amongst individuals 14 years or older recruited from 4 towns in the Lanusei Valley of Sardinia; the Study of Health in Pomerania (SHIP, N=4,101) a population-based, cross-sectional study of German men and women aged 20 to 79 years; and the TwinsUK study (N=2,256), a population-based sample of British female twins, unselected for any disease or trait. Cohort characteristics are shown in **Supplementary Tables 1 & 2**.

### *Collaborators*

#### Members of DIAGRAM+ consortium

Benjamin F Voight, Laura J Scott, Valgerdur Steinthorsdottir, Andrew P Morris, Christian Dina, Ryan P Welch, Eleftheria Zeggini, Cornelia Huth, Yurii S Aulchenko, Gudmar Thorleifsson, Laura J McCulloch, Teresa Ferreira, Harald Grallert, Najaf Amin, Guanming Wu, Cristen J Willer, Soumya Raychaudhuri, Steve A McCarroll, Claudia Langenberg, Oliver M Hofmann, Josée Dupuis, Lu Qi, Ayellet V Segrè, Mandy van Hoek, Pau Navarro, Kristin Ardlie, Beverley Balkau, Rafn Benediktsson, Amanda J Bennett, Roza Blagieva, Eric Boerwinkle, Lori L Bonnycastle, Kristina Bengtsson Boström, Bert Bravenboer, Suzannah Bumpstead, Noël P Burt, Guillaume Charpentier, Peter S Chines, Marilyn Cornelis, David J Couper, Gabe Crawford, Alex SF Doney, Katherine S Elliott, Amanda L Elliott, Michael R Erdos, Caroline S Fox, Christopher S Franklin, Martha Ganser, Christian Gieger, Niels Grarup, Todd Green, Simon Griffin, Christopher J Groves, Candace Guiducci, Samy Hadjadj, Neelam Hassanali, Christian Herder, Bo Isomaa, Anne U Jackson, Paul RV Johnson, Torben Jørgensen, Wen HL Kao,

Norman Klopp, Augustine Kong, Peter Kraft, Johanna Kuusisto, Torsten Lauritzen, Man Li, Aloysius Lieverse, Cecilia M Lindgren, Valeriya Lyssenko, Michel Marre, Thomas Meitinger, Kristian Midthjell, Mario A Morken, Narisu Narisu, Peter Nilsson, Katharine R Owen, Felicity Payne, John RB Perry, Ann-Kristin Petersen, Carl Platou, Christine Proença, Inga Prokopenko, Wolfgang Rathmann, N William Rayner, Neil R Robertson, Ghislain Rocheleau, Michael Roden, Michael J Sampson, Richa Saxena, Beverley M Shields, Peter Shrader, Gunnar Sigurdsson, Thomas Sparsø, Klaus Strassburger, Heather M Stringham, Qi Sun, Amy J Swift, Barbara Thorand, Jean Tichet, Tiinamaija Tuomi, Rob M van Dam, Timon W van Haeften, Thijs van Herpt, Jana V van Vliet-Ostaptchouk, G Bragi Walters, Michael N Weedon, Cisca Wijmenga, Jacqueline Witteman, Richard N Bergman, Stephane Cauchi, Francis S Collins, Anna L Gloyn, Ulf Gyllensten, Torben Hansen, Winston A Hide, Graham A Hitman, Albert Hofman, David J Hunter, Kristian Hveem, Markku Laakso, Karen L Mohlke, Andrew D Morris, Colin NA Palmer, Peter P Pramstaller, Igor Rudan, Eric Sijbrands, Lincoln D Stein, Jaakko Tuomilehto, Andre Uitterlinden, Mark Walker, Nicholas J Wareham, Richard M Watanabe, Goncalo R Abecasis, Bernhard O Boehm, Harry Campbell, Mark J Daly, Andrew T Hattersley, Frank B Hu, James B Meigs, James S Pankow, Oluf Pedersen, H.-Erich Wichmann, Inês Barroso, Jose C Florez, Timothy M Frayling, Leif Groop, Rob Sladek, Unnur Thorsteinsdottir, James F Wilson, Thomas Illig, Philippe Froguel, Cornelia M van Duijn, Kari Stefansson, David Altshuler, Michael Boehnke, Mark I McCarthy.

#### Members of the GIANT consortium

Lango Allen H, Estrada K, Lettre G, Berndt SI, Weedon MN, Rivadeneira F, Willer CJ, Jackson AU, Vedantam S, Raychaudhuri S, Ferreira T, Wood AR, Weyant RJ, Segrè AV, Speliotes EK, Wheeler E, Soranzo N, Park JH, Yang J, Gudbjartsson D, Heard-Costa NL, Randall JC, Qi L, Vernon Smith A, Mägi R, Pastinen T, Liang L, Heid IM, Luan J, Thorleifsson G, Winkler TW, Goddard ME, Sin Lo K, Palmer C, Workalemahu T, Aulchenko YS, Johansson A, Zillikens MC, Feitosa MF, Esko T, Johnson T, Ketkar S, Kraft P, Mangino M, Prokopenko I, Absher D, Albrecht E, Ernst F, Glazer NL, Hayward C, Hottenga JJ, Jacobs KB, Knowles JW, Kutalik Z, Monda KL, Polasek O, Preuss M, Rayner NW, Robertson NR, Steinthorsdottir V, Tyrer JP, Voight BF, Wiklund F, Xu J, Hua Zhao J, Nyholt DR, Pellikka N, Perola M, Perry JR, Surakka I, Tammesoo ML, Altmaier EL, Amin N, Aspelund T, Bhangale T, Boucher G, Chasman DI, Chen C, Coin L, Cooper MN, Dixon AL, Gibson Q, Grundberg E, Hao K, Juhani Juntila M, Kaplan LM, Kettunen J, König IR, Kwan T, Lawrence RW, Levinson DF, Lorentzon M, McKnight B, Morris AP, Müller M, Suh Ngwa J, Purcell S, Rafelt S, Salem RM, Salvi E, Sanna S, Shi J, Sovio U, Thompson JR, Turchin MC, Vandenput L, Verlaan DJ, Vitart V, White CC, Ziegler A, Almgren P, Balmforth AJ, Campbell H, Citterio L, De Grandi A, Dominiczak A, Duan J, Elliott P, Elosua R, Eriksson JG, Freimer NB, Geus EJ, Glorioso N, Haiqing S, Hartikainen AL, Havulinna AS, Hicks AA, Hui J, Igl W, Illig T, Jula A, Kajantie E, Kilpeläinen TO, Koironen M, Kolcic I, Koskinen S, Kovacs P, Laitinen J, Liu J, Lokki ML, Marusic A, Maschio A, Meitinger T, Mulas A, Paré G, Parker AN, Peden JF, Petersmann A, Pichler I, Pietiläinen KH, Pouta A, Ridderstråle M, Rotter JI, Sambrook JG, Sanders AR, Oliver Schmidt C, Sinisalo J, Smit JH, Stringham HM, Bragi Walters G, Widen E, Wild SH, Willemsen G, Zagato L, Zgaga L, Zitting P, Alavere H, Farrall M, McArdle WL, Nelis M, Peters MJ, Ripatti S, van Meurs JB, Aben KK, Ardlie KG, Beckmann JS, Beilby JP, Bergman RN, Bergmann S, Collins FS, Cusi D, den Heijer M, Eiriksdottir G, Gejman PV, Hall AS, Hamsten A, Huikuri HV, Iribarren C, Kähönen M, Kaprio J, Kathiresan S, Kiemenev L, Kocher T, Launer LJ, Lehtimäki T, Melander O, Mosley TH Jr, Musk AW, Nieminen MS, O'Donnell CJ, Ohlsson C, Oostra B, Palmer LJ, Raitakari O, Ridker PM, Rioux JD, Rissanen A, Rivolta C, Schunkert H, Shuldiner AR, Siscovick DS, Stumvoll M, Tönjes A, Tuomilehto J, van Ommen GJ, Viikari J, Heath AC, Martin NG, Montgomery GW, Province MA, Kayser M, Arnold AM, Atwood LD, Boerwinkle E, Chanock SJ, Deloukas P, Gieger C, Grönberg H, Hall P, Hattersley AT, Hengstenberg C, Hoffman W, Mark Lathrop G, Salomaa V, Schreiber S, Uda M, Waterworth D, Wright AF, Assimes TL, Barroso I, Hofman A, Mohlke KL, Boomsma DI, Caulfield MJ, Adrienne Cupples L, Erdmann J, Fox CS, Gudnason V, Gyllensten U, Harris TB, Hayes RB, Jarvelin MR, Mooser V, Munroe PB, Ouwehand WH, Penninx BW, Pramstaller PP,



Quertermous T, Rudan I, Samani NJ, Spector TD, Völzke H, Watkins H, Wilson JF, Groop LC, Haritunians T, Hu FB, Kaplan RC, Metspalu A, North KE, Schlessinger D, Wareham NJ, Hunter DJ, O'Connell JR, Strachan DP, Wichmann HE, Borecki IB, van Duijn CM, Schadt EE, Thorsteinsdottir U, Peltonen L, Uitterlinden AG, Visscher PM, Chatterjee N, Loos RJ, Boehnke M, McCarthy MI, Ingelsson E, Lindgren CM, Abecasis GR, Stefansson K, Frayling TM, Hirschhorn JN

#### Members of Global Lipids Genetics Consortium

Teslovich TM, Musunuru K, Smith AV, Edmondson AC, Stylianou IM, Koseki M, Pirruccello JP, Ripatti S, Chasman DI, Willer CJ, Johansen CT, Fouchier SW, Isaacs A, Peloso GM, Barbalic M, Ricketts SL, Bis JC, Aulchenko YS, Thorleifsson G, Feitosa MF, Chambers J, Orho-Melander M, Melander O, Johnson T, Li X, Guo X, Li M, Shin Cho Y, Jin Go M, Jin Kim Y, Lee JY, Park T, Kim K, Sim X, Tzee-Hee Ong R, Croteau-Chonka DC, Lange LA, Smith JD, Song K, Hua Zhao J, Yuan X, Luan J, Lamina C, Ziegler A, Zhang W, Zee RY, Wright AF, Witteman JC, Wilson JF, Willemsen G, Wichmann HE, Whitfield JB, Waterworth DM, Wareham NJ, Waeber G, Vollenweider P, Voight BF, Vitart V, Uitterlinden AG, Uda M, Tuomilehto J, Thompson JR, Tanaka T, Surakka I, Stringham HM, Spector TD, Soranzo N, Smit JH, Sinisalo J, Silander K, Sijbrands EJ, Scuteri A, Scott J, Schlessinger D, Sanna S, Salomaa V, Saharinen J, Sabatti C, Ruokonen A, Rudan I, Rose LM, Roberts R, Rieder M, Psaty BM, Pramstaller PP, Pichler I, Perola M, Penninx BW, Pedersen NL, Pattaro C, Parker AN, Pare G, Oostra BA, O'Donnell CJ, Nieminen MS, Nickerson DA, Montgomery GW, Meitinger T, McPherson R, McCarthy MI, McArdle W, Masson D, Martin NG, Marroni F, Mangino M, Magnusson PK, Lucas G, Luben R, Loos RJ, Lokki ML, Lettre G, Langenberg C, Launer LJ, Lakatta EG, Laaksonen R, Kyvik KO, Kronenberg F, König IR, Khaw KT, Kaprio J, Kaplan LM, Johansson A, Jarvelin MR, Janssens AC, Ingelsson E, Igl W, Kees Hovingh G, Hottenga JJ, Hofman A, Hicks AA, Hengstenberg C, Heid IM, Hayward C, Havulinna AS, Hastie ND, Harris TB, Haritunians T, Hall AS, Gyllenstein U, Guiducci C, Groop LC, Gonzalez E, Gieger C, Freimer NB, Ferrucci L, Erdmann J, Elliott P, Ejebe KG, Döring A, Dominiczak AF, Demissie S, Deloukas P, de Geus EJ, de Faire U, Crawford G, Collins FS, Chen YD, Caulfield MJ, Campbell H, Burt NP, Bonnycastle LL, Boomsma DI, Boekholdt SM, Bergman RN, Barroso I, Bandinelli S, Ballantyne CM, Assimes TL, Quertermous T, Altshuler D, Seielstad M, Wong TY, Tai ES, Feranil AB, Kuzawa CW, Adair LS, Taylor HA Jr, Borecki IB, Gabriel SB, Wilson JG, Holm H, Thorsteinsdottir U, Gudnason V, Krauss RM, Mohlke KL, Ordovas JM, Munroe PB, Kooner JS, Tall AR, Hegele RA, Kastelein JJ, Schadt EE, Rotter JI, Boerwinkle E, Strachan DP, Mooser V, Stefansson K, Reilly MP, Samani NJ, Schunkert H, Cupples LA, Sandhu MS, Ridker PM, Rader DJ, van Duijn CM, Peltonen L, Abecasis GR, Boehnke M, Kathiresan S

#### Members of the GOLD Consortium

Elizabeth K. Speliotes, Laura M. Yerges-Armstrong, Jun Wu, Ruben Hernaez, Lauren J. Kim, Cameron D. Palmer, Vilmondur Gudnason, Gudny Eiriksdottir, Melissa E. Garcia, Lenore J. Launer, Michael A. Nalls, Jeanne M. Clark, Braxton D. Mitchell, Alan R. Shuldiner, Johannah L. Butler, Marta Tomas, Udo Hoffmann, Shih-Jen Hwang, Joseph M. Massaro, Christopher J. O'Donnell, Dushyant V. Sahani, Veikko Salomaa, Eric E. Schadt, Stephen M. Schwartz, David S. Siscovick, Benjamin F. Voight, J. Jeffrey Carr, Mary F. Feitosa, Tamara B. Harris, Caroline S. Fox, Albert V. Smith, W. H. Linda Kao, Joel N. Hirschhorn, Ingrid B. Borecki.

#### Members of the ICBP-GWAS

Georg B. Ehret, Patricia B. Munroe, Kenneth M. Rice, Murielle Bochud, Andrew D. Johnson, Daniel I. Chasman, Albert V. Smith, Martin D. Tobin, Germaine C. Verwoert, Shih-Jen Hwang, Vasyl Pihur, Peter Vollenweider, Paul F. O'Reilly, Najaf Amin, Jennifer L Bragg-Gresham, Alexander Teumer, Nicole L. Glazer, Lenore Launer, Jing Hua Zhao, Yurii Aulchenko, Simon Heath, Siim Sober, Afshin Parsa, Jian'an Luan, Pankaj Arora, Abbas Dehghan, Feng Zhang, Gavin Lucas, Andrew A. Hicks, Anne U. Jackson, John F Peden, Toshiko Tanaka, Sarah H. Wild, Igor Rudan, Wilmar Igl, Yuri Milaneschi, Alex N. Parker, Cristiano Fava, John C.

Chambers, Ervin R. Fox, Meena Kumari, Min Jin Go, Pim van der Harst, Wen Hong Linda Kao, Marketa Sjogren, D. G. Vinay, Myriam Alexander, Yasuharu Tabara, Sue Shaw-Hawkins, Peter H. Whincup, Yongmei Liu, Gang Shi, Johanna Kuusisto, Bamidele Tayo, Mark Seielstad, Xueling Sim, Khanh-Dung Hoang Nguyen, Terho Lehtimaki, Giuseppe Matullo, Ying Wu, Tom R. Gaunt, N. Charlotte Onland- Moret, Matthew N. Cooper, Carl G.P. Platou, Elin Org, Rebecca Hardy, Santosh Dahgam, Jutta Palmen, Veronique Vitart, Peter S. Braund, Tatiana Kuznetsova, Cuno S.P.M. Uiterwaal, Adebowale Adeyemo, Walter Palmas, Harry Campbell, Barbara Ludwig, Maciej Tomaszewski, Ioanna Tzoulaki, Nicholette D. Palmer, Thor Aspelund, Melissa Garcia, Yen-Pei C. Chang, Jeffrey R. O'Connell, Nanette I. Steinle, Diederick E. Grobbee, Dan E. Arking, Sharon L. Kardia, Alanna C. Morrison, Dena Hernandez, Samer Najjar, Wendy L. McArdle, David Hadley, Morris J. Brown, John M. Connell, Aroon D. Hingorani, Ian N.M. Day, Debbie A. Lawlor, John P. Beilby, Robert W. Lawrence, Robert Clarke, Rory Collins, Jemma C Hopewell, Halit Ongen, Albert W. Dreisbach, Yali Li, J H. Young, Joshua C. Bis, Mika Kahonen, Jorma Viikari, Linda S. Adair, Nanette R. Lee, Ming-Huei Chen, Matthias Olden, Cristian Pattaro, Judith A. Hoffman Bolton, Anna Kottgen, Sven Bergmann, Vincent Mooser, Nish Chaturvedi, Timothy M. Frayling, Muhammad Islam, Tazeen H. Jafar, Jeanette Erdmann, Smita R. Kulkarni, Stefan R. Bornstein, Jurgen Grasser, Leif Groop, Benjamin F. Voight, Johannes Kettunen, Philip Howard, Andrew Taylor, Simonetta Guarrera, Fulvio Ricceri, Valur Emilsson, Andrew Plump, Ines Barroso, Kay-Tee Khaw, Alan B. Weder, Steven C. Hunt, Yan V. Sun, Richard N. Bergman, Francis S. Collins, Lori L. Bonnycastle, Laura J. Scott, Heather M. Stringham, Leena Peltonen, Markus Perola, Erkki Vartiainen, Stefan-Martin Brand, Jan A. Staessen, Thomas J. Wang, Paul R. Burton, Maria Soler Artigas, Yanbin Dong, Harold Snieder, Xiaoling Wang, Haidong Zhu, Kurt K. Lohman, Megan E. Rudock, Susan R Heckbert, Nicholas L Smith, Kerri L Wiggins, Ayo Doumatey, Daniel Shriener, Gudrun Veldre, Margus Viigimaa, Sanjay Kinra, Dorairajan Prabhakaran, Vikal Tripathy, Carl D. Langefeld, Annika Rosengren, Dag S. Thelle, Anna Maria Corsi, Andrew Singleton, Terrence Forrester, Gina Hilton, Colin A. McKenzie, Tunde Salako, Naoharu Iwai, Yoshikuni Kita, Toshio Ogihara, Takayoshi Ohkubo, Tomonori Okamura, Hirotugu Ueshima, Satoshi Umemura, Susana Eyheramendy, Thomas Meitinger, H.-Erich Wichmann, Yoon Shin Cho, Hyung-Lae Kim, Jong-Young Lee, James Scott, Joban S. Sehmi, Weihua Zhang, Bo Hedblad, Peter Nilsson, George Davey Smith, Andrew Wong, Narisu Narisu, Alena Stančakova, Leslie J. Raffel, Jie Yao, Sekar Kathiresan, Chris O'Donnell, Steven M. Schwartz, M. Arfan Ikram, Will T. Longstreth Jr., Thomas H. Mosley, Sudha Seshadri, Nick R.G. Shrine, Louise V. Wain, Mario A. Morken, Amy J. Swift, Jaana Laitinen, Inga Prokopenko, Paavo Zitting, Jackie A. Cooper, Steve E. Humphries, John Danesh, Asif Rasheed, Anuj Goel, Anders Hamsten, Hugh Watkins, Stephan J.L. Bakker, Wiek H. van Gilst, Charles S. Janipalli, K. Radha Mani, Chittaranjan S. Yajnik, Albert Hofman, Francesco U.S. Mattace-Raso, Ben A. Oostra, Ayse Demirkan, Aaron Isaacs, Fernando Rivadeneira, Edward G Lakatta, Marco Orru, Angelo Scuteri, Mika Ala-Korpela, Antti J Kangas, Leo-Pekka Lyytikainen, Pasi Soininen, Taru Tukiainen, Peter Wurz, Rick Twee-Hee Ong, Marcus Dorr, Heyo K. Kroemer, Uwe Volker, Henry Volzke, Pilar Galan, Serge Hercberg, Mark Lathrop, Diana Zelenika, Panos Deloukas, Massimo Mangino, Tim D. Spector, Guangju Zhai, James F. Meschia, Michael A. Nalls, Pankaj Sharma, Janos Terzic, M. J. Kranthi Kumar, Matthew Denniff, Ewa Zukowska-Szczekowska, Lynne E. Wagenknecht, F. Gerald R. Fowkes, Fadi J. Charchar, Peter E.H. Schwarz, Caroline Hayward, Xiuqing Guo, Charles Rotimi, Michiel L. Bots, Eva Brand, Nilesh J. Samani, Ozren Polasek, Philippa J. Talmud, Fredrik Nyberg, Diana Kuh, Maris Laan, Kristian Hveem, Lyle J. Palmer, Yvonne T. van der Schouw, Juan P. Casas, Karen L. Mohlke, Paolo Vineis, Olli Raitakari, Santhi K. Ganesh, Tien Y. Wong, E Shyong Tai, Richard S. Cooper, Markku Laakso, Dabeeru C. Rao, Tamara B. Harris, Richard W. Morris, Anna F. Dominiczak, Mika Kivimaki, Michael G. Marmot, Tetsuro Miki, Danish Saleheen, Giriraj R. Chandak, Josef Coresh, Gerjan Navis, Veikko Salomaa, Bok-Ghee Han, Xiaofeng Zhu, Jaspal S. Kooner, Olle Melander, Paul M Ridker, Stefania Bandinelli, Ulf B. Gyllensten, Alan F. Wright, James F. Wilson, Luigi Ferrucci, Martin Farrall, Jaakko Tuomilehto, Peter P. Pramstaller, Roberto Elosua, Nicole Soranzo, Eric J.G. Sijbrands, David Altshuler, Ruth J.F. Loos, Alan R.

Shuldiner, Christian Gieger, Pierre Meneton, Andre G. Uitterlinden, Nicholas J. Wareham, Vilmundur Gudnason, Jerome I. Rotter, Rainer Rettig, Manuela Uda, David P. Strachan, Jacqueline C.M. Witteman, Anna-Liisa Hartikainen, Jacques S. Beckmann, Eric Boerwinkle, Ramachandran S. Vasani, Michael Boehnke, Martin G. Larson, Marjo-Riitta Jarvelin, Bruce M. Psaty, Goncalo R. Abecasis, Aravinda Chakravarti, Paul Elliott, Cornelia M. van Duijn, Christopher Newton-Cheh, Daniel Levy, Mark J. Caulfield, Toby Johnson.

#### Members of the MAGIC consortium

Dupuis J, Langenberg C, Prokopenko I, Saxena R, Soranzo N, Jackson AU, Wheeler E, Glazer NL, Bouatia-Naji N, Gloyn AL, Lindgren CM, Mägi R, Morris AP, Randall J, Johnson T, Elliott P, Rybin D, Thorleifsson G, Steinthorsdottir V, Henneman P, Grallert H, Dehghan A, Hottenga JJ, Franklin CS, Navarro P, Song K, Goel A, Perry JR, Egan JM, Lajunen T, Grarup N, Sparsø T, Doney A, Voight BF, Stringham HM, Li M, Kanoni S, Shrader P, Cavalcanti-Proença C, Kumari M, Qi L, Timpson NJ, Gieger C, Zabena C, Rocheleau G, Ingelsson E, An P, O'Connell J, Luan J, Elliott A, McCarroll SA, Payne F, Roccascaccia RM, Pattou F, Sethupathy P, Ardlie K, Ariyurek Y, Balkau B, Barter P, Beilby JP, Ben-Shlomo Y, Benediktsson R, Bennett AJ, Bergmann S, Bochud M, Boerwinkle E, Bonnefond A, Bonnycastle LL, Borch-Johnsen K, Böttcher Y, Brunner E, Bumpstead SJ, Charpentier G, Chen YD, Chines P, Clarke R, Coin LJ, Cooper MN, Cornelis M, Crawford G, Crisponi L, Day IN, de Geus EJ, Delplanque J, Dina C, Erdos MR, Fedson AC, Fischer-Rosinsky A, Forouhi NG, Fox CS, Frants R, Franzosi MG, Galan P, Goodarzi MO, Graessler J, Groves CJ, Grundy S, Gwilliam R, Gyllenstein U, Hadjadj S, Hallmans G, Hammond N, Han X, Hartikainen AL, Hassanali N, Hayward C, Heath SC, Hercberg S, Herder C, Hicks AA, Hillman DR, Hingorani AD, Hofman A, Hui J, Hung J, Isomaa B, Johnson PR, Jørgensen T, Jula A, Kaakinen M, Kaprio J, Kesaniemi YA, Kivimäki M, Knight B, Koskinen S, Kovacs P, Kyvik KO, Lathrop GM, Lawlor DA, Le Bacquer O, Lecoeur C, Li Y, Lyssenko V, Mahley R, Mangino M, Manning AK, Martínez-Larrad MT, McAteer JB, McCulloch LJ, McPherson R, Meisinger C, Melzer D, Meyre D, Mitchell BD, Morken MA, Mukherjee S, Naitza S, Narisu N, Neville MJ, Oostra BA, Orrù M, Pakyz R, Palmer CN, Paolisso G, Pattaro C, Pearson D, Peden JF, Pedersen NL, Perola M, Pfeiffer AF, Pichler I, Polasek O, Posthuma D, Potter SC, Pouta A, Province MA, Psaty BM, Rathmann W, Rayner NW, Rice K, Ripatti S, Rivadeneira F, Roden M, Rolandsson O, Sandbaek A, Sandhu M, Sanna S, Sayer AA, Scheet P, Scott LJ, Seedorf U, Sharp SJ, Shields B, Sigurdsson G, Sijbrands EJ, Silveira A, Simpson L, Singleton A, Smith NL, Sovio U, Swift A, Syddall H, Syvänen AC, Tanaka T, Thorand B, Tichet J, Tönjes A, Tuomi T, Uitterlinden AG, van Dijk KW, van Hoek M, Varma D, Visvikis-Siest S, Vitart V, Vogelzang N, Waeber G, Wagner PJ, Walley A, Walters GB, Ward KL, Watkins H, Weedon MN, Wild SH, Willemsen G, Witteman JC, Yarnell JW, Zeggini E, Zelenika D, Zethelius B, Zhai G, Zhao JH, Zillikens MC; DIAGRAM Consortium; GIANT Consortium; Global BPgen Consortium, Borecki IB, Loos RJ, Meneton P, Magnusson PK, Nathan DM, Williams GH, Hattersley AT, Silander K, Salomaa V, Smith GD, Bornstein SR, Schwarz P, Spranger J, Karpe F, Shuldiner AR, Cooper C, Dedoussis GV, Serrano-Ríos M, Morris AD, Lind L, Palmer LJ, Hu FB, Franks PW, Ebrahim S, Marmot M, Kao WH, Pankow JS, Sampson MJ, Kuusisto J, Laakso M, Hansen T, Pedersen O, Pramstaller PP, Wichmann HE, Illig T, Rudan I, Wright AF, Stumvoll M, Campbell H, Wilson JF; Anders Hamsten on behalf of Procardis Consortium; MAGIC investigators, Bergman RN, Buchanan TA, Collins FS, Mohlke KL, Tuomilehto J, Valle TT, Altshuler D, Rotter JI, Siscovick DS, Penninx BW, Boomsma DI, Deloukas P, Spector TD, Frayling TM, Ferrucci L, Kong A, Thorsteinsdottir U, Stefansson K, van Duijn CM, Aulchenko YS, Cao A, Scuteri A, Schlessinger D, Uda M, Ruukonen A, Jarvelin MR, Waterworth DM, Vollenweider P, Peltonen L, Mooser V, Abecasis GR, Wareham NJ, Sladek R, Froguel P, Watanabe RM, Meigs JB, Groop L, Boehnke M, McCarthy MI, Florez JC, Barroso

#### *Study specific acknowledgments*

**Australian Twin Cohort:** The SSAGA and SSAGA Blood studies were supported by the National Institutes of Health (AA007535), and genotyping was part of the GenomEUtwin project

supported by the European Commission under the programme “Quality of Life and Management of the Living Resources” of 5th Framework Programme (QLG2-CT-2002–01254).

**BRIGHT:** We thank the participants of the British Genetics of Hypertension (BRIGHT) Study. The BRIGHT study and current work are supported by the Medical Research Council of Great Britain (grant number; G9521010D) and the British Heart Foundation (grant number PG02/128). The Wellcome Trust Case Control Consortium was funded by the Wellcome Trust (grant number; 076113/B/04/Z). The Barts and The London Charity funded the Barts and The London Genome Centre. This work forms part of the research themes contributing to the translational research portfolio for Barts and the London Cardiovascular Biomedical Research Unit, which is supported and funded by the National Institute for Health Research. Profs Dominiczak and Samani are British Heart Foundation Chairholders. Chris Wallace was funded by the British Heart Foundation (grant number: FS/05/061/19501).

**CoLaus:** The CoLaus study was supported by GlaxoSmithKline, the Swiss National Science Foundation (Grant 33CSCO-122661) and the Faculty of Biology and Medicine, Lausanne, Switzerland. The authors would like to express their gratitude to the participants in the CoLaus study, to the investigators who have contributed to the recruitment, in particular Yolande Barreau, Anne-Lise Bastian, Binasa Ramic, Martine Moranville, Martine Baumer, Marcy Sagette, Jeanne Ecoffey and Sylvie Mermoud for data collection.

**deCODE:** We thank the Icelandic study participants whose contribution made this work possible. We would also like to acknowledge the staff at the Clinical Research Centre (Iceland) and the deCODE genetics biological materials and genotyping facilities for their work. The research performed at deCODE genetics was part funded through the European Community's Seventh Framework programme (FP7/2007-2013), ENGAGE project, grant agreement HEALTH-F4-2007- 201413.

**NHLBI Family Heart Study (FamHS):** This research was conducted using data and resources from the NHLBI Family Heart Study and Washington University School of Medicine. The work was partially supported by the NIDDK (5R01DK075681, Borecki, PI) and NHLBI (5R01HL087700, Province, PI).

**FENLAND:** The Fenland Study is funded by the Wellcome Trust and the Medical Research Council. We are grateful to all the volunteers for their time and help, and to the General Practitioners and practice staff for help with recruitment. We thank the Fenland Study co-ordination team and the Field Epidemiology team of the MRC Epidemiology Unit for recruitment and clinical testing. Serum liver assays were performed by the National Institute for Health Research, Cambridge Biomedical Research Centre, Core Biochemistry Assay Laboratory.

**FINNISH TWIN COHORT:** Support for this study was obtained from the Academy of Finland Centre of Excellence in Complex Disease Genetics, ENGAGE project grant agreement HEALTH-F4-2007-201413, and the following foundations: Novo Nordisk, Yrjö Jahnsson, Biomedicum Helsinki, Gyllenberg and Finnish Foundation for Cardiovascular Research. We acknowledge the contributions of Jaakko Kaprio, Aila Rissanen, Ida Surakka, Samuli Ripatti and Leena Peltonen.

**Framingham Heart Study:** This research was conducted in part using data and resources from the Framingham Heart Study of the National Heart Lung and Blood Institute of the National Institutes of Health and Boston University School of Medicine. The analyses reflect intellectual input and resource development from the Framingham Heart Study investigators participating in the SNP Health Association Resource (SHARe) project. This work was partially supported by the National Heart, Lung and Blood Institute's Framingham Heart Study (Contract No. N01-HC-25195) and its contract with Affymetrix, Inc for genotyping services (Contract No.

N02-HL-6-4278). A portion of this research utilized the Linux Cluster for Genetic Analysis (LinGA-II) funded by the Robert Dawson Evans Endowment of the Department of Medicine at Boston University School of Medicine and Boston Medical Center.

**KORA:** The MONICA/KORA Augsburg studies were financed by the Helmholtz Zentrum München, German Research Center for Environmental Health, Neuherberg, Germany and supported by grants from the German Federal Ministry of Education and Research (BMBF). Part of this work was financed by the German National Genome Research Network (NGFN) and supported within the Munich Center of Health Sciences (MC Health) as part of LMUinnovativ. We gratefully acknowledge the contribution of T. Meitinger (PI), P. Lichtner, G. Eckstein, T. Strom and all other members of the Helmholtz Zentrum München genotyping staff in generating and analyzing the SNP dataset and G. Fischer for data management. We thank all members of field staffs who were involved in the planning and conduct of the MONICA/KORA Augsburg studies.

**LIFELINES:** The LifeLines Cohort Study, and generation and management of genome-wide association genotype data for the LifeLines Cohort Study is supported by the Netherlands Organization of Scientific Research NWO (grant 175.010.2007.006), the Economic Structure Enhancing Fund (FES) of the Dutch government, the Ministry of Economic Affairs, the Ministry of Education, Culture and Science, the Ministry for Health, Welfare and Sports, the Northern Netherlands Collaboration of Provinces (SNN), the Province of Groningen, University Medical Center Groningen, the University of Groningen, Dutch Kidney Foundation and Dutch Diabetes Research Foundation. We thank Behrooz Alizadeh, Annemieke Boesjes, Marcel Bruinenberg, Noortje Festen, Ilja Nolte, Lude Franke, Mitra Valimohammadi for their help in creating the genome-wide association study database, and Rob Bieringa, Joost Keers, René Oostergo, Rosalie Visser, Judith Vonk for their work related to data-collection and validation. The authors are grateful to the study participants, the staff from the LifeLines Cohort Study and Medical Biobank Northern Netherlands, and the participating general practitioners and pharmacists.

**LOLIPOP:** The LOLIPOP study is supported by the National Institute for Health Research (NIHR) Comprehensive Biomedical Research Centre Imperial College Healthcare NHS Trust, the British Heart Foundation (SP/04/002), the Medical Research Council (G0700931), the Wellcome Trust (084723/Z/08/Z) and the NIHR (RP-PG-0407-10371). We thank the participants and research staff who made the study possible. PE is an NIHR Senior Investigator. GD was supported by the Chongqing Natural Science Foundation For Distinguished Young Scholars (grant no. CSTC2011JJJQ0015).

**NESDA:** The NESDA study was supported by the Geestkracht program of ZonMW [grant 10-000-1002]; the Center for Medical Systems Biology (CSMB, NWO Genomics), Biobanking and Biomolecular Resources Research Infrastructure (BBMRI –NL), Neuroscience Campus Amsterdam (NCA), matching funds from universities and mental health care institutes involved in NESDA (GGZ InGeest, Rivierduinen, University Medical Center Groningen, GGZ 25 Lentis, GGZ Friesland, GGZ Drenthe). Genotyping was funded by the Genetic Association Information Network (GAIN) of the Foundation for the US National Institutes of Health, and analysis was supported by grants from GAIN and the NIMH (MH081802). Genotype data were obtained from dbGaP (<http://www.ncbi.nlm.nih.gov/dbgap>, accession number phs000020.v1.p1). Statistical analyses were carried out on the Genetic Cluster Computer (<http://www.geneticcluster.org>), which is financially supported by the Netherlands Scientific Organization (NWO 480-05-003) along with a supplement from the Dutch Brain Foundation.

**Netherlands Twins Register:** Funding was obtained from the Netherlands Organization for Scientific Research (NWO: MagW/ZonMW grants 904-61-090, 985-10-002, 904-61-193, 480-04-004, 400-05-717, Addiction-31160008 Middelgroot-911-09-032, Spinozapremie 56-464-14192), Center for Medical Systems Biology (CSMB, NWO Genomics), NBIC/BioAssist/RK(2008.024),

Biobanking and Biomolecular Resources Research Infrastructure (BBMRI –NL), the VU University's Institute for Health and Care Research (EMGO+ ) and Neuroscience Campus Amsterdam (NCA), the European Science Foundation (ESF, EU/QLRT-2001-01254), the European Community's Seventh Framework Program (FP7/2007-2013), ENGAGE (HEALTH-F4-2007-201413); the European Science Council (ERC Advanced, 230374), Rutgers University Cell and DNA Repository (NIMH U24 MH068457-06), and the National Institutes of Health (NIH, R01D0042157-01A). Part of the genotyping and analyses were funded by the Genetic Association Information Network (GAIN) of the Foundation for the US National Institutes of Health, and by grants from GAIN and the NIMH (MH081802). These genotype data were obtained from dbGaP (<http://www.ncbi.nlm.nih.gov/dbgap>, accession number phs000020.v1.p1).

**Northern Finland Birth Cohort 1966:** We thank Professor Paula Rantakallio (launch of NFBC1966), Ms Outi Tornwall and Ms Minttu Jussila (DNA biobanking). Financial support was received from the Academy of Finland (project grants 104781, 120315, 129269, 139900, 1114194 and Center of Excellence in Complex Disease Genetics), University Hospital Oulu, Biocenter, University of Oulu, Finland, NHLBI grant 5R01HL087679-02 through the STAMPEED program (1RL1MH083268-01), ENGAGE project and grant agreement HEALTH-F4-2007-201413, the Medical Research Council (studentship grant G0500539, centre grant G0600705, SALVE/PrevMetSyn), the Wellcome Trust (project grant GR069224), UK. Dr Elina Hyppönen and the liver assays were funded by a Career Scientist Award from the Department of Health, UK. The DNA extractions, sample quality controls, biobank up-keeping and aliquotting were performed in the National Public Health Institute, Biomedicum Helsinki, Finland and supported financially by the Academy of Finland and Biocentrum Helsinki.

**PROCARDIS:** We are grateful to the participants and to the medical and nursing staff who assisted in this project. The PROCARDIS study was supported by the European Community Sixth Framework Program (LSHM-CT-2007-037273), AstraZeneca, the Wellcome Trust (090532/Z/09/Z), the Swedish Research Council, the Knut and Alice Wallenberg Foundation, the Swedish Heart-Lung Foundation, the Torsten and Ragnar Söderberg Foundation, the Strategic Cardiovascular Program of Karolinska Institutet and Stockholm County Council, the Foundation for Strategic Research and the Stockholm County Council (560283). M. Farrall and H. Watkins are supported by the Oxford British Heart Foundation Centre of Research Excellence.

**ROTTERDAM STUDY 1:** The generation and management of genome-wide association study genotype data for the Rotterdam Study is supported by the Netherlands Organisation of Scientific Research NWO Investments (nr. 175.010.2005.011, 911-03-012). This study is funded by the Research Institute for Diseases in the Elderly (014-93-015; RIDE2), the Netherlands Genomics Initiative (NGI)/Netherlands Organisation for Scientific Research (NWO) project nr. 050-060-810. The work of CMvD is supported by the NGI Center of Medical Systems Biology. We thank Pascal Arp, Mila Jhamai, Marijn Verkerk, Lizbeth Herrera and Marjolein Peters for their help in creating the genome-wide association study database, and Karol Estrada and Maksim V. Struchalin for their support in creation and analysis of imputed data. The Rotterdam Study is funded by Erasmus Medical Center and Erasmus University, Rotterdam, Netherlands Organization for the Health Research and Development (ZonMw), the Research Institute for Diseases in the Elderly (RIDE), the Ministry of Education, Culture and Science, the Ministry for Health, Welfare and Sports, the European Commission (DG XII), and the Municipality of Rotterdam. This Study is further supported by NWO (Vici 918.76.619). The authors are grateful to the study participants, the staff from the Rotterdam Study and the participating general practitioners and pharmacists.

**SardiNIA:** The SardiNIA project is supported by the Intramural Research Program of the NIH, National Institute on Aging (N01-AG-1-2109). The efforts of GRA was supported in part by research grants from the National Human Genome Research Institute, and the National Heart Lung and Blood Institute (Grant codes HG02651, HL084729). We also acknowledge the support

provided by a grant from the Italian Ministry of Economy and Finance to the CNR for the Project FaReBio di Qualita. We would like to thank SardiNIA study participants for their volunteerism and the local civil and religious authorities in SardiNIA for their support. Gonçalo Abecasis is a Pew Scholar in the Biomedical Sciences

**SHIP:** The SHIP authors are grateful to the contribution of Alexander Teumer and Anja Hoffmann in generating the SNP data. SHIP is part of the Community Medicine Research net of the University of Greifswald, Germany, which is funded by the Federal Ministry of Education and Research (grants no. 01ZZ9603, 01ZZ0103, and 01ZZ0403), the Ministry of Cultural Affairs as well as the Social Ministry of the Federal State of Mecklenburg-West Pomerania. Genome-wide data have been supported by the Federal Ministry of Education and Research (grant no. 03ZIK012) and a joint grant from Siemens Healthcare, Erlangen, Germany and the Federal State of Mecklenburg- West Pomerania. The University of Greifswald is a member of the 'Center of Knowledge Interchange' program of the Siemens AG.

**TwinsUK:** We thank the study participants and staff from TwinsUK. The authors acknowledge financial support from the Wellcome Trust, the Department of Health via the National Institute for Health Research (NIHR) comprehensive Biomedical Research Centre award to Guy's & St Thomas' NHS Foundation Trust in partnership with King's College London / Arthritis Research Campaign/ EC FP6 Programme Grant-512066 (LSHG-CT-2004)MOLPAGE// EC Framework 7 Health-2007-A ENGAGE) Biotechnology and biological Sciences Research Council (BBSRC). KRA is in part supported by a career development research fellowship from the Chronic Diseases Research Foundation (CDRF). NR is supported by a studentship from the CDRF.

**Canadian Primary Biliary Cirrhosis Genetics Study:** The primary biliary cirrhosis genome-wide association study was supported by grants from the Canadian Institutes for Health Research (MOP74621), Ontario Research Fund (RE01-061) and the Canadian Primary Biliary Cirrhosis Society. KAS is supported by a Canada Research Chair and the Sherman Family Chair in Genomic Medicine.

**GOLD consortium:** The GOLD study was supported in part by NIDDK grant 5R01DK075681 (Borecki, PI).

**NMR Metabonomics:** NMR studies were supported by the Academy of Finland (in the Responding to Public Health Challenges Research Programme to MJS and MAK; a post-doc position to PS, a grant 135973 to PW), the Finnish Cardiovascular Research Foundation (MJS and MAK), the Instrumentarium Science Foundation (PW), and the Jenny and Antti Wihuri Foundation (AJK).

#### *Supplementary reference List*

1. Horiguchi Y, Araki M, Motojima K. 17beta-Hydroxysteroid dehydrogenase type 13 is a liver-specific lipid droplet-associated protein. *Biochem Biophys Res Commun* 2008;370(2):235-238.
2. Turjanski AG, Vaque JP, Gutkind JS. MAP kinases and the control of nuclear events. *Oncogene* 2007;26(22):3240-3253.
3. Yamamoto M, Uematsu S, Okamoto T et al. Enhanced TLR-mediated NF-IL6 dependent gene expression by Trib1 deficiency. *J Exp Med* 2007;204(9):2233-2239.
4. Sung HY, Guan H, Czibula A et al. Human tribbles-1 controls proliferation and chemotaxis of smooth muscle cells via MAPK signaling pathways. *J Biol Chem* 2007;282(25):18379-18387.
5. Kathiresan S, Willer CJ, Peloso GM et al. Common variants at 30 loci contribute to polygenic dyslipidemia. *Nat Genet* 2009;41(1):56-65.

6. Matthews KW, Mueller-Ortiz SL, Wetsel RA. Carboxypeptidase N: a pleiotropic regulator of inflammation. *Mol Immunol* 2004;40(11):785-793.
7. Mathews KP, Pan PM, Amendola MA, Lewis FH. Plasma protease inhibitor and anaphylatoxin inactivator levels in chronic urticaria/angioedema and in patients experiencing anaphylactoid reactions to radiographic contrast media. *Int Arch Allergy Appl Immunol* 1986;79(2):220-223.
8. Calvo RM, Obregon MJ. Tri-iodothyronine upregulates adiponutrin mRNA expression in rat and human adipocytes. *Mol Cell Endocrinol* 2009;311(1-2):39-46.
9. Kotronen A, Johansson LE, Johansson LM et al. A common variant in PNPLA3, which encodes adiponutrin, is associated with liver fat content in humans. *Diabetologia* 2009;52(6):1056-1060.
10. Tian C, Stokowski RP, Kershenovich D, Ballinger DG, Hinds DA. Variant in PNPLA3 is associated with alcoholic liver disease. *Nat Genet* 2010;42(1):21-23.
11. Xie J, Marusich MF, Souda P, Whitelegge J, Capaldi RA. The mitochondrial inner membrane protein mitofilin exists as a complex with SAM50, metaxins 1 and 2, coiled-coil-helix coiled-coil-helix domain-containing protein 3 and 6 and DnaJC11. *FEBS Lett* 2007;581(18):3545-3549.
12. Crofton PM. Biochemistry of alkaline phosphatase isoenzymes. *Crit Rev Clin Lab Sci* 1982;16(3):161-194.
13. Vandepoele K, Van RN, Staes K, Speleman F, van RF. A novel gene family NBPF: intricate structure generated by gene duplications during primate evolution. *Mol Biol Evol* 2005;22(11):2265-2274.
14. Mefford HC, Sharp AJ, Baker C et al. Recurrent rearrangements of chromosome 1q21.1 and variable pediatric phenotypes. *N Engl J Med* 2008;359(16):1685-1699.
15. Sharp AJ, Hansen S, Selzer RR et al. Discovery of previously unidentified genomic disorders from the duplication architecture of the human genome. *Nat Genet* 2006;38(9):1038-1042.
16. Stefansson H, Rujescu D, Cichon S et al. Large recurrent microdeletions associated with schizophrenia. *Nature* 2008;455(7210):232-236.
17. Vandepoele K, Andries V, Van RN et al. A constitutional translocation t(1;17)(p36.2;q11.2) in a neuroblastoma patient disrupts the human NBPF1 and ACCN1 genes. *PLoS One* 2008;3(5):e2207.
18. Meza-Zepeda LA, Forus A, Lygren B et al. Positional cloning identifies a novel cyclophilin as a candidate amplified oncogene in 1q21. *Oncogene* 2002;21(14):2261-2269.
19. Noe J, Stieger B, Meier PJ. Functional expression of the canalicular bile salt export pump of human liver. *Gastroenterology* 2002;123(5):1659-1666.
20. van Mil SW, van der Woerd WL, van der Brugge G et al. Benign recurrent intrahepatic cholestasis type 2 is caused by mutations in ABCB11. *Gastroenterology* 2004;127(2):379-384.
21. Knisely AS, Strautnieks SS, Meier Y et al. Hepatocellular carcinoma in ten children under five years of age with bile salt export pump deficiency. *Hepatology* 2006;44(2):478-486.
22. Malaspina P, Picklo MJ, Jakobs C, Snead OC, Gibson KM. Comparative genomics of aldehyde dehydrogenase 5a1 (succinate semialdehyde dehydrogenase) and accumulation of gamma-hydroxybutyrate associated with its deficiency. *Hum Genomics* 2009;3(2):106-120.
23. Bekri S, Fossoud C, Plaza G et al. The molecular basis of succinic semialdehyde dehydrogenase deficiency in one family. *Mol Genet Metab* 2004;81(4):347-351.
24. Deeg MA, Bierman EL, Cheung MC. GPI-specific phospholipase D associates with an apoA-I- and apoA-IV-containing complex. *J Lipid Res* 2001;42(3):442-451.
25. LeBoeuf RC, Caldwell M, Guo Y et al. Mouse glycosylphosphatidylinositol-specific phospholipase D (Gpld1) characterization. *Mamm Genome* 1998;9(9):710-714.
26. Movahedi S, Hooper NM. Insulin stimulates the release of the glycosyl phosphatidylinositol-anchored membrane dipeptidase from 3T3-L1 adipocytes through the action of a phospholipase C. *Biochem J* 1997;326 ( Pt 2):531-537.



27. Montori-Grau M, Guitart M, Lerin C et al. Expression and glycogenic effect of glycogen-targeting protein phosphatase 1 regulatory subunit GL in cultured human muscle. *Biochem J* 2007;405(1):107-113.
28. Zibrova D, Grempler R, Streicher R, Kauschke SG. Inhibition of the interaction between protein phosphatase 1 glycogen-targeting subunit and glycogen phosphorylase increases glycogen synthesis in primary rat hepatocytes. *Biochem J* 2008;412(2):359-366.
29. Gasa R, Jensen PB, Berman HK, Brady MJ, DePaoli-Roach AA, Newgard CB. Distinctive regulatory and metabolic properties of glycogen-targeting subunits of protein phosphatase-1 (PTG, GL, GM/RGI) expressed in hepatocytes. *J Biol Chem* 2000;275(34):26396-26403.
30. Ostertag A, Jones A, Rose AJ et al. Control of adipose tissue inflammation through TRB1. *Diabetes* 2010;59(8):1991-2000.
31. Kiss-Toth E, Bagstaff SM, Sung HY et al. Human tribbles, a protein family controlling mitogen-activated protein kinase cascades. *J Biol Chem* 2004;279(41):42703-42708.
32. Yamamoto M, Uematsu S, Okamoto T et al. Enhanced TLR-mediated NF-IL6 dependent gene expression by Trib1 deficiency. *J Exp Med* 2007;204(9):2233-2239.
33. Munnich A, Besmond C, Darquy S et al. Dietary and hormonal regulation of aldolase B gene expression. *J Clin Invest* 1985;75(3):1045-1052.
34. Cross NC, de FR, Sebastio G et al. Molecular analysis of aldolase B genes in hereditary fructose intolerance. *Lancet* 1990;335(8685):306-309.
35. Ali M, Rellos P, Cox TM. Hereditary fructose intolerance. *J Med Genet* 1998;35(5):353-365.
36. Yamamoto F, Clausen H, White T, Marken J, Hakomori S. Molecular genetic basis of the histo-blood group ABO system. *Nature* 1990;345(6272):229-233.
37. Amundadottir L, Kraft P, Stolzenberg-Solomon RZ et al. Genome-wide association study identifies variants in the ABO locus associated with susceptibility to pancreatic cancer. *Nat Genet* 2009;41(9):986-990.
38. Edgren G, Hjalgrim H, Rostgaard K et al. Risk of gastric cancer and peptic ulcers in relation to ABO blood type: a cohort study. *Am J Epidemiol* 2010;172(11):1280-1285.
39. Yuan X, Waterworth D, Perry JR et al. Population-based genome-wide association studies reveal six loci influencing plasma levels of liver enzymes. *Am J Hum Genet* 2008;83(4):520-528.
40. Katoh M, Katoh M. Comparative integromics on JMJD1C gene encoding histone demethylase: conserved POU5F1 binding site elucidating mechanism of JMJD1C expression in undifferentiated ES cells and diffuse-type gastric cancer. *Int J Oncol* 2007;31(1):219-223.
41. Klose RJ, Kallin EM, Zhang Y. JmjC-domain-containing proteins and histone demethylation. *Nat Rev Genet* 2006;7(9):715-727.
42. Yasumo H, Masuda N, Furusawa T, Tsukamoto T, Sadano H, Osumi T. Nuclear receptor binding factor-2 (NRBF-2), a possible gene activator protein interacting with nuclear hormone receptors. *Biochim Biophys Acta* 2000;1490(1-2):189-197.
43. Schaeffer L, Gohlke H, Muller M et al. Common genetic variants of the FADS1 FADS2 gene cluster and their reconstructed haplotypes are associated with the fatty acid composition in phospholipids. *Hum Mol Genet* 2006;15(11):1745-1756.
44. Nakamura MT, Cho HP, Xu J, Tang Z, Clarke SD. Metabolism and functions of highly unsaturated fatty acids: an update. *Lipids* 2001;36(9):961-964.
45. Park EI, Mi Y, Unverzagt C, Gabius HJ, Baenziger JU. The asialoglycoprotein receptor clears glycoconjugates terminating with sialic acid alpha 2,6GalNAc. *Proc Natl Acad Sci U S A* 2005;102(47):17125-17129.
46. Sorensen AL, Rumjantseva V, Nayeb-Hashemi S et al. Role of sialic acid for platelet life span: exposure of beta-galactose results in the rapid clearance of platelets from the circulation by asialoglycoprotein receptor-expressing liver macrophages and hepatocytes. *Blood* 2009;114(8):1645-1654.
47. Ellies LG, Ditto D, Levy GG et al. Sialyltransferase ST3Gal-IV operates as a dominant modifier of hemostasis by concealing asialoglycoprotein receptor ligands. *Proc Natl Acad Sci U S A* 2002;99(15):10042-10047.

48. Nielsen MJ, Petersen SV, Jacobsen C et al. Haptoglobin-related protein is a high-affinity hemoglobin-binding plasma protein. *Blood* 2006;108(8):2846-2849.
49. Ludford-Menting MJ, Thomas SJ, Crimeen B et al. A functional interaction between CD46 and DLG4: a role for DLG4 in epithelial polarization. *J Biol Chem* 2002;277(6):4477-4484.
50. Wolpin BM, Kraft P, Xu M et al. Variant ABO blood group alleles, secretor status, and risk of pancreatic cancer: results from the pancreatic cancer cohort consortium. *Cancer Epidemiol Biomarkers Prev* 2010;19(12):3140-3149.
51. Ferrer-Admetlla A, Sikora M, Laayouni H et al. A natural history of FUT2 polymorphism in humans. *Mol Biol Evol* 2009;26(9):1993-2003.
52. Hazra A, Kraft P, Selhub J et al. Common variants of FUT2 are associated with plasma vitamin B12 levels. *Nat Genet* 2008;40(10):1160-1162.
53. Lindesmith L, Moe C, Marionneau S et al. Human susceptibility and resistance to Norwalk virus infection. *Nat Med* 2003;9(5):548-553.
54. Blankman JL, Simon GM, Cravatt BF. A comprehensive profile of brain enzymes that hydrolyze the endocannabinoid 2-arachidonoylglycerol. *Chem Biol* 2007;14(12):1347-1356.
55. Fiskerstrand T, H'mida-Ben BD, Johansson S et al. Mutations in ABHD12 cause the neurodegenerative disease PHARC: An inborn error of endocannabinoid metabolism. *Am J Hum Genet* 2010;87(3):410-417.
56. Kamada K, Kubota Y, Arata T, Shindo Y, Hanaoka F. Structure of the human GINS complex and its assembly and functional interface in replication initiation. *Nat Struct Mol Biol* 2007;14(5):388-396.
57. Diemel GA, Ball KK, Cruz NF. A glycogen phosphorylase inhibitor selectively enhances local rates of glucose utilization in brain during sensory stimulation of conscious rats: implications for glycogen turnover. *J Neurochem* 2007;102(2):466-478.
58. Gray RS, Abitua PB, Wlodarczyk BJ et al. The planar cell polarity effector Fuz is essential for targeted membrane trafficking, ciliogenesis and mouse embryonic development. *Nat Cell Biol* 2009;11(10):1225-1232.
59. Kullander K, Klein R. Mechanisms and functions of Eph and ephrin signalling. *Nat Rev Mol Cell Biol* 2002;3(7):475-486.
60. Dobrzanski P, Hunter K, Jones-Bolin S et al. Antiangiogenic and antitumor efficacy of EphA2 receptor antagonist. *Cancer Res* 2004;64(3):910-919.
61. Jun G, Guo H, Klein BE et al. EPHA2 is associated with age-related cortical cataract in mice and humans. *PLoS Genet* 2009;5(7):e1000584.
62. Han Q, Cai T, Tagle DA, Li J. Structure, expression, and function of kynurenine aminotransferases in human and rodent brains. *Cell Mol Life Sci* 2010;67(3):353-368.
63. Du F, Williamson J, Bertram E, Lothman E, Okuno E, Schwarcz R. Kynurenine pathway enzymes in a rat model of chronic epilepsy: immunohistochemical study of activated glial cells. *Neuroscience* 1993;55(4):975-989.
64. Muller N, Myint AM, Schwarz MJ. Kynurenine pathway in schizophrenia: pathophysiological and therapeutic aspects. *Curr Pharm Des* 2011;17(2):130-136.
65. Sas K, Robotka H, Toldi J, Vecsei L. Mitochondria, metabolic disturbances, oxidative stress and the kynurenine system, with focus on neurodegenerative disorders. *J Neurol Sci* 2007;257(1-2):221-239.
66. Yu W, Liu J, Morrice NA, Wettenhall RE. Isolation and characterization of a structural homologue of human PRK2 from rat liver. Distinguishing substrate and lipid activator specificities. *J Biol Chem* 1997;272(15):10030-10034.
67. Saxena R, Voight BF, Lyssenko V et al. Genome-wide association analysis identifies loci for type 2 diabetes and triglyceride levels. *Science* 2007;316(5829):1331-1336.
68. Chakravarthy MV, Lodhi IJ, Yin L et al. Identification of a physiologically relevant endogenous ligand for PPARalpha in liver. *Cell* 2009;138(3):476-488.
69. Ashida H, Maeda Y, Kinoshita T. DPM1, the catalytic subunit of dolichol-phosphate mannose synthase, is tethered to and stabilized on the endoplasmic reticulum membrane by DPM3. *J Biol Chem* 2006;281(2):896-904.

70. Lefeber DJ, Schonberger J, Morava E et al. Deficiency of Dol-P-Man synthase subunit DPM3 bridges the congenital disorders of glycosylation with the dystroglycanopathies. *Am J Hum Genet* 2009;85(1):76-86.
71. Wykosky J, Debinski W. The EphA2 receptor and ephrinA1 ligand in solid tumors: function and therapeutic targeting. *Mol Cancer Res* 2008;6(12):1795-1806.
72. Cui XD, Lee MJ, Yu GR et al. EFNA1 ligand and its receptor EphA2: potential biomarkers for hepatocellular carcinoma. *Int J Cancer* 2010;126(4):940-949.
73. Morrissey C, True LD, Roudier MP et al. Differential expression of angiogenesis associated genes in prostate cancer bone, liver and lymph node metastases. *Clin Exp Metastasis* 2008;25(4):377-388.
74. Ekman P, Dahlqvist U, Humble E, Engstrom L. Comparative kinetic studies on the L-type pyruvate kinase from rat liver and the enzyme phosphorylated by cyclic 3', 5'-AMP-stimulated protein kinase. *Biochim Biophys Acta* 1976;429(2):374-382.
75. Kanno H, Fujii H, Hirono A, Miwa S. cDNA cloning of human R-type pyruvate kinase and identification of a single amino acid substitution (Thr384----Met) affecting enzymatic stability in a pyruvate kinase variant (PK Tokyo) associated with hereditary hemolytic anemia. *Proc Natl Acad Sci U S A* 1991;88(18):8218-8221.
76. Hayward BE, Fantes JA, Warner JP et al. Co-localization of the ketohexokinase and glucokinase regulator genes to a 500-kb region of chromosome 2p23. *Mamm Genome* 1996;7(6):454-458.
77. Gloyn AL, Odili S, Zelent D et al. Insights into the structure and regulation of glucokinase from a novel mutation (V62M), which causes maturity-onset diabetes of the young. *J Biol Chem* 2005;280(14):14105-14113.
78. Teslovich TM, Musunuru K, Smith AV et al. Biological, clinical and population relevance of 95 loci for blood lipids. *Nature* 2010;466(7307):707-713.
79. Dupuis J, Langenberg C, Prokopenko I et al. New genetic loci implicated in fasting glucose homeostasis and their impact on type 2 diabetes risk. *Nat Genet* 2010;42(2):105-116.
80. Elliott P, Chambers JC, Zhang W et al. Genetic Loci associated with C-reactive protein levels and risk of coronary heart disease. *JAMA* 2009;302(1):37-48.
81. Yang Z, Wen J, Tao X et al. Genetic variation in the GCKR gene is associated with non-alcoholic fatty liver disease in Chinese people. *Mol Biol Rep* 2011;38(2):1145-1150.
82. Voight BF, Scott LJ, Steinthorsdottir V et al. Twelve type 2 diabetes susceptibility loci identified through large-scale association analysis. *Nat Genet* 2010;42(7):579-589.
83. Lewis JH, Lin T, Hokanson DE, Ostap EM. Temperature dependence of nucleotide association and kinetic characterization of myo1b. *Biochemistry* 2006;45(38):11589-11597.
84. Takeda K, Akira S. STAT family of transcription factors in cytokine-mediated biological responses. *Cytokine Growth Factor Rev* 2000;11(3):199-207.
85. Nakayama S, Kretsinger RH. Evolution of the EF-hand family of proteins. *Annu Rev Biophys Biomol Struct* 1994;23:473-507.
86. Tominaga M, Tomooka Y. Novel genes cloned from a neuronal cell line newly established from a cerebellum of an adult p53(-/-) mouse. *Biochem Biophys Res Commun* 2002;297(3):473-479.
87. Santer R, Schneppenheim R, Dombrowski A, Gotze H, Steinmann B, Schaub J. Mutations in GLUT2, the gene for the liver-type glucose transporter, in patients with Fanconi-Bickel syndrome. *Nat Genet* 1997;17(3):324-326.
88. Guillam MT, Hummler E, Schaerer E et al. Early diabetes and abnormal postnatal pancreatic islet development in mice lacking Glut-2. *Nat Genet* 1997;17(3):327-330.
89. Marsenic O. Glucose control by the kidney: an emerging target in diabetes. *Am J Kidney Dis* 2009;53(5):875-883.
90. Shimoyama Y, Takeda H, Yoshihara S, Kitajima M, Hirohashi S. Biochemical characterization and functional analysis of two type II classic cadherins, cadherin-6 and -14, and comparison with E-cadherin. *J Biol Chem* 1999;274(17):11987-11994.

91. Shimoyama Y, Takeda H, Yoshihara S, Kitajima M, Hirohashi S. Biochemical characterization and functional analysis of two type II classic cadherins, cadherin-6 and -14, and comparison with E-cadherin. *J Biol Chem* 1999;274(17):11987-11994.
92. Shimoyama Y, Gotoh M, Terasaki T, Kitajima M, Hirohashi S. Isolation and sequence analysis of human cadherin-6 complementary DNA for the full coding sequence and its expression in human carcinoma cells. *Cancer Res* 1995;55(10):2206-2211.
93. Zheng DL, Zhang L, Cheng N et al. Epigenetic modification induced by hepatitis B virus X protein via interaction with de novo DNA methyltransferase DNMT3A. *J Hepatol* 2009;50(2):377-387.
94. Hynes RO. Integrins: versatility, modulation, and signaling in cell adhesion. *Cell* 1992;69(1):11-25.
95. Kang L, Ayala JE, Lee-Young RS et al. Diet-Induced Muscle Insulin Resistance Is Associated With Extracellular Matrix Remodeling and Interaction With Integrin  $\alpha_2\beta_1$  in Mice. *Diabetes* 2011;60(2):416-426.
96. Baum S, Barzilay A, Huszar M, Greenberger S, Trau H, Bank I. Very late antigen-1 in psoriasis: an immunohistochemical study. *J Eur Acad Dermatol Venereol* 2008;22(3):283-289.
97. Dennis J, Meehan DT, Delimont D et al. Collagen XIII induced in vascular endothelium mediates  $\alpha_1\beta_1$  integrin-dependent transmigration of monocytes in renal fibrosis. *Am J Pathol* 2010;177(5):2527-2540.
98. Ostergaard K, Salter DM, Petersen J, Bendtzen K, Hvolris J, Andersen CB. Expression of alpha and beta subunits of the integrin superfamily in articular cartilage from macroscopically normal and osteoarthritic human femoral heads. *Ann Rheum Dis* 1998;57(5):303-308.
99. Ekholm E, Hankenson KD, Uusitalo H et al. Diminished callus size and cartilage synthesis in alpha 1 beta 1 integrin-deficient mice during bone fracture healing. *Am J Pathol* 2002;160(5):1779-1785.
100. Lee HJ, Kim SY, Koh JM et al. Polymorphisms and haplotypes of integrin  $\alpha_1$  (ITGA1) are associated with bone mineral density and fracture risk in postmenopausal Koreans. *Bone* 2007;41(6):979-986.
101. Cairo S, Merla G, Urbinati F, Ballabio A, Reymond A. WBSR14, a gene mapping to the Williams-Beuren syndrome deleted region, is a new member of the Mlx transcription factor network. *Hum Mol Genet* 2001;10(6):617-627.
102. Uyeda K, Repa JJ. Carbohydrate response element binding protein, ChREBP, a transcription factor coupling hepatic glucose utilization and lipid synthesis. *Cell Metab* 2006;4(2):107-110.
103. Kooner JS, Chambers JC, Aguilar-Salinas CA et al. Genome-wide scan identifies variation in MLXIPL associated with plasma triglycerides. *Nat Genet* 2008;40(2):149-151.
104. Wakabayashi M, Ito T, Mitsushima M et al. Interaction of Iq-dlg/KIAA0583, a membrane-associated guanylate kinase family protein, with vinexin and beta-catenin at sites of cell-cell contact. *J Biol Chem* 2003;278(24):21709-21714.
105. Friedrichs F, Henckaerts L, Vermeire S et al. The Crohn's disease susceptibility gene DLG5 as a member of the CARD interaction network. *J Mol Med* 2008;86(4):423-432.
106. Vaxillaire M, Boccio V, Philippi A et al. A gene for maturity onset diabetes of the young (MODY) maps to chromosome 12q. *Nat Genet* 1995;9(4):418-423.
107. Holter S, Pollett A, Zogopoulos G et al. Hepatic adenomas caused by somatic HNF1A mutations in children with biallelic mismatch repair gene mutations. *Gastroenterology* 2011;140(2):735-736.
108. Shin DM, Zhao XS, Zeng W, Mozhayeva M, Muallem S. The mammalian Sec6/8 complex interacts with Ca<sup>2+</sup> signaling complexes and regulates their activity. *J Cell Biol* 2000;150(5):1101-1112.
109. Delerive P, Monte D, Dubois G et al. The orphan nuclear receptor ROR alpha is a negative regulator of the inflammatory response. *EMBO Rep* 2001;2(1):42-48.
110. Genoux A, Dehondt H, Helleboid-Chapman A et al. Transcriptional regulation of apolipoprotein A5 gene expression by the nuclear receptor RORalpha. *Arterioscler Thromb Vasc Biol* 2005;25(6):1186-1192.

111. Sundvold H, Lien S. Identification of a novel peroxisome proliferator-activated receptor (PPAR) gamma promoter in man and transactivation by the nuclear receptor RORalpha1. *Biochem Biophys Res Commun* 2001;287(2):383-390.
112. Zhu Y, McAvoy S, Kuhn R, Smith DI. RORA, a large common fragile site gene, is involved in cellular stress response. *Oncogene* 2006;25(20):2901-2908.
113. Hamilton BA, Frankel WN, Kerrebrock AW et al. Disruption of the nuclear hormone receptor RORalpha in staggerer mice. *Nature* 1996;379(6567):736-739.
114. Lau P, Fitzsimmons RL, Pearen MA, Watt MJ, Muscat GE. Homozygous staggerer (sg/sg) mice display improved insulin sensitivity and enhanced glucose uptake in skeletal muscle. *Diabetologia* 2011.
115. Stapleton CM, Jaradat M, Dixon D et al. Enhanced susceptibility of staggerer (RORalpha<sup>sg/sg</sup>) mice to lipopolysaccharide-induced lung inflammation. *Am J Physiol Lung Cell Mol Physiol* 2005;289(1):L144-L152.
116. Chapoval AI, Ni J, Lau JS et al. B7-H3: a costimulatory molecule for T cell activation and IFN-gamma production. *Nat Immunol* 2001;2(3):269-274.
117. Hashiguchi M, Kobori H, Ritprajak P, Kamimura Y, Kozono H, Azuma M. Triggering receptor expressed on myeloid cell-like transcript 2 (TLT-2) is a counter-receptor for B7-H3 and enhances T cell responses. *Proc Natl Acad Sci U S A* 2008;105(30):10495-10500.
118. King SM. The dynein microtubule motor. *Biochim Biophys Acta* 2000;1496(1):60-75.
119. Jin Q, Gao G, Mulder KM. Requirement of a dynein light chain in TGFbeta/Smad3 signaling. *J Cell Physiol* 2009;221(3):707-715.
120. Zhou G, Zheng Q, Engin F et al. Dominance of SOX9 function over RUNX2 during skeletogenesis. *Proc Natl Acad Sci U S A* 2006;103(50):19004-19009.
121. Moreno-Mendoza N, Harley V, Merchant-Larios H. Cell aggregation precedes the onset of Sox9-expressing preSertoli cells in the genital ridge of mouse. *Cytogenet Genome Res* 2003;101(3-4):219-223.
122. Zehentner BK, Dony C, Burtscher H. The transcription factor Sox9 is involved in BMP-2 signaling. *J Bone Miner Res* 1999;14(10):1734-1741.
123. Zhou G, Lefebvre V, Zhang Z, Eberspaecher H, de CB. Three high mobility group-like sequences within a 48-base pair enhancer of the Col2a1 gene are required for cartilage-specific expression in vivo. *J Biol Chem* 1998;273(24):14989-14997.
124. Hsiao HP, Tsai LP, Chao MC, Tseng HI, Chang YC. Novel SOX9 gene mutation in campomelic dysplasia with autosomal sex reversal. *J Formos Med Assoc* 2006;105(12):1013-1016.
125. Folmer DE, van der Mark VA, Ho-Mok KS, Oude Elferink RP, Paulusma CC. Differential effects of progressive familial intrahepatic cholestasis type 1 and benign recurrent intrahepatic cholestasis type 1 mutations on canalicular localization of ATP8B1. *Hepatology* 2009;50(5):1597-1605.
126. Paulusma CC, Groen A, Kunne C et al. Atp8b1 deficiency in mice reduces resistance of the canalicular membrane to hydrophobic bile salts and impairs bile salt transport. *Hepatology* 2006;44(1):195-204.
127. Bull LN, van Eijk MJ, Pawlikowska L et al. A gene encoding a P-type ATPase mutated in two forms of hereditary cholestasis. *Nat Genet* 1998;18(3):219-224.
128. Zheng X, Morrison AC, Feingold E, Turner ST, Ferrell RE. Association between NEDD4L gene and sodium lithium countertransport. *Am J Hypertens* 2011;24(2):145-148.
129. Bron R, Vermeren M, Kokot N et al. Boundary cap cells constrain spinal motor neuron somal migration at motor exit points by a semaphorin-plexin mechanism. *Neural Dev* 2007;2:21.
130. Hung RJ, Yazdani U, Yoon J et al. Mical links semaphorins to F-actin disassembly. *Nature* 2010;463(7282):823-827.
131. Esumi N, Budarf M, Ciccarelli L, Sellinger B, Kozak CA, Wistow G. Conserved gene structure and genomic linkage for D-dopachrome tautomerase (DDT) and MIF. *Mamm Genome* 1998;9(9):753-757.
132. Calandra T, Roger T. Macrophage migration inhibitory factor: a regulator of innate immunity. *Nat Rev Immunol* 2003;3(10):791-800.

133. Pemble S, Schroeder KR, Spencer SR et al. Human glutathione S-transferase theta (GSTT1): cDNA cloning and the characterization of a genetic polymorphism. *Biochem J* 1994;300 ( Pt 1):271-276.
134. Josephy PD. Genetic variations in human glutathione transferase enzymes: significance for pharmacology and toxicology. *Hum Genomics Proteomics* 2010;2010:876940.
135. Heisterkamp N, Groffen J, Warburton D, Sneddon TP. The human gamma-glutamyltransferase gene family. *Hum Genet* 2008;123(4):321-332.
136. Paolicchi A, Dominici S, Pieri L, Maellaro E, Pompella A. Glutathione catabolism as a signaling mechanism. *Biochem Pharmacol* 2002;64(5-6):1027-1035.
137. Harding CO, Williams P, Wagner E et al. Mice with genetic gamma-glutamyl transpeptidase deficiency exhibit glutathionuria, severe growth failure, reduced life spans, and infertility. *J Biol Chem* 1997;272(19):12560-12567.
138. A haplotype map of the human genome. *Nature* 2005;437(7063):1299-1320.
139. Durbin RM, Abecasis GR, Altshuler DL et al. A map of human genome variation from population-scale sequencing. *Nature* 2010;467(7319):1061-1073.
140. Emilsson V, Thorleifsson G, Zhang B et al. Genetics of gene expression and its effect on disease. *Nature* 2008;452(7186):423-428.
141. Dixon AL, Liang L, Moffatt MF et al. A genome-wide association study of global gene expression. *Nat Genet* 2007;39(10):1202-1207.
142. Raychaudhuri S, Plenge RM, Rossin EJ et al. Identifying relationships among genomic disease regions: predicting genes at pathogenic SNP associations and rare deletions. *PLoS Genet* 2009;5(6):e1000534.
143. Schumann G, Coin LJ, Lourdasamy A et al. Genome-wide association and genetic functional studies identify autism susceptibility candidate 2 gene (AUTS2) in the regulation of alcohol consumption. *Proc Natl Acad Sci U S A* 2011;108(17):7119-7124.
144. Speliotes EK, Yerges-Armstrong LM, Wu J et al. Genome-wide Association Analysis Identifies Variants Associated with Nonalcoholic Fatty Liver Disease that have Distinct Effects on Metabolic Traits. *Proc Natl Acad Sci U S A* 2011.
145. Newton-Cheh C, Johnson T, Gateva V et al. Genome-wide association study identifies eight loci associated with blood pressure. *Nat Genet* 2009;41(6):666-676.
